# Supplementary material for: Enantioselective synthesis of 8-azabicyclo[3.2.1]octanes via asymmetric 1,3-dipolar cycloadditions of cyclic azomethine ylides using a dual catalytic system
Source: Royal Society of Chemistry journal article supplement (doi:10.1039/c8cc09224a), 2018-12-18

# Enantioselective Synthesis of 8-Azabicyclo[3.2.1]octanes via Asymmetric 1,3-Dipolar Cycloadditions of Cyclic Azomethine Ylides Using a Dual Catalytic System

*Hiroyuki Suga, \* Masahiro Yoshiwara, Takaaki Yamaguchi, Takashi Bando, Mizuki Taguchi, Ayno Inaba, Yuichi Goto, Ayaka Kikuchi, Kennosuke Itoh, Yasunori Toda*

Department of Materials Chemistry, Faculty of Engineering, Shinshu University  
4-17-1 Wakasato, Nagano 380-8553, Japan

## Table of Contents

|                                                                                                             |     |
|-------------------------------------------------------------------------------------------------------------|-----|
| Experimental section.....                                                                                   | S2  |
| Reactions of diazo <i>O</i> -methyloxime <b>1a</b> with acryloyloxazolidinone <b>S1</b> .....               | S34 |
| Optimization of conditions for asymmetric cycloadditions using <i>O</i> -methyloxime <b>1a</b> .....        | S36 |
| Optimization of chiral Lewis acids for asymmetric cycloadditions using diazo isoxazolines <b>4</b> .....    | S37 |
| X-ray crystallographic analysis of <b>5</b> .....                                                           | S38 |
| Determination of the absolute configuration of alcohol <b>S4</b> derived from <i>endo</i> - <b>5f</b> ..... | S39 |
| <sup>19</sup> F NMR of ( <i>S</i> )-MTPA- <b>S4</b> and ( <i>R</i> )-MTPA- <b>S4</b> .....                  | S40 |
| Proposed transition state models for the cyclic azomethine ylides.....                                      | S41 |
| References.....                                                                                             | S42 |
| NMR spectra.....                                                                                            | S43 |
| HPLC analyses.....                                                                                          | S72 |

## Experimental section

### **General.**

Melting points were determined on a Yanaco MP-13 melting point apparatus and are uncorrected. IR spectra were taken with a JASCO FT/IR-5300S spectrophotometer. <sup>1</sup>H NMR spectra were recorded on BRUKER AVANCE III Fourier 300 (300 MHz), Ascend 500 (500 MHz), or JEOL JNM-GX400 (400 MHz) spectrometers. Chemical shifts are expressed in parts per million downfield from tetramethylsilane as an internal standard. <sup>13</sup>C NMR spectra were recorded on BRUKER AVANCE III Fourier 300 (75 MHz), Ascend 500 (125 MHz), or JEOL JNM-GX400 (100 MHz) spectrometers using broadband proton decoupling. Chemical shifts are expressed in parts per million using the middle resonance of CDCl<sub>3</sub> (77.0 ppm), C<sub>6</sub>D<sub>6</sub> (128.06 ppm), CD<sub>3</sub>OD (49.00 ppm), and DMSO-*d*<sub>6</sub> (39.52 ppm) as an internal standard. Hydrogen multiplicity (C, CH, CH<sub>2</sub>, CH<sub>3</sub>) information was obtained from carbon DEPT spectra. High-resolution mass spectra were obtained on BRUKER micrOTOF II ESI-TOF or HITACHI M-80B spectrometers. Wakogel C-300HG (FUJIFILM Wako) were employed for preparative column chromatography. Unless otherwise noted, all reactions were carried out under an argon atmosphere in dried glassware.

### **Materials.**

2-(2-Diazoacetyl)benzaldehyde *O*-methyloxime (**1a**) and 2-acryloyl-5,5-dimethyl-3-pyrazolidinones **2a** and **2b** were prepared according to the literature.<sup>1,2</sup> Chiral binaphthylidimine ligands **A** – **D** were prepared by the reported procedure.<sup>3</sup> Ni(ClO<sub>4</sub>)<sub>2</sub>·6H<sub>2</sub>O, Co(ClO<sub>4</sub>)<sub>2</sub>·6H<sub>2</sub>O, Zn(ClO<sub>4</sub>)<sub>2</sub>·6H<sub>2</sub>O, Cu(ClO<sub>4</sub>)<sub>2</sub>·6H<sub>2</sub>O, and Cu(OTf)<sub>2</sub> are commercially available, and used without further purification. Powdered 4Å molecular sieves (MS 4A) was commercially available and dried in vacuo over 200 °C for 12 h before use.

**General procedure for the cycloaddition of the cyclic azomethine ylide generated from *O*-methyloxime **1**, exemplified by the reaction of 2-(2-diazoacetyl)benzaldehyde *O*-methyloxime (**1a**) with acryloylpyrazolidinone **2b**.** To a 30 mL two-necked flask equipped with a stir bar was added MS 4A (254.0 mg), Cu(OTf)<sub>2</sub> (36.2 mg, 0.10 mmol, 20 mol %), and ligand **E** (56.6 mg, 0.10 mmol, 20 mol %). After the flask was purged with oxygen, CHCl<sub>3</sub> (4.0 mL) was added, and then the mixture was stirred at 35 °C for 6 h. After the addition of Rh<sub>2</sub>(OAc)<sub>4</sub> (4.4 mg, 0.01 mmol, 2 mol %) and acryloylpyrazolidinone **2b** (308.2 mg, 1.0 mmol), a solution of *O*-methyloxime **1a** (101.6 mg, 0.50 mmol) in CHCl<sub>3</sub> (5.0 mL) was added dropwise over a period of 3 h at 35 °C using a syringe pump under an oxygen atmosphere. Subsequently, the syringe was washed with CHCl<sub>3</sub> (1.0 mL) and the wash was added to the reaction mixture. The mixture was filtered through a plug of silica gel-Celite (SiO<sub>2</sub>: 1.5 g), rinsed with a mixture of Hexane/EtOAc (25 mL/25 mL), and then concentrated. Flash column chromatography (SiO<sub>2</sub>: 30 g, Hexane:EtOAc = 85:15, v/v) yielded cycloadduct *exo*-**3b** (234.3 mg, 97%, *exo:endo* = >99:1).

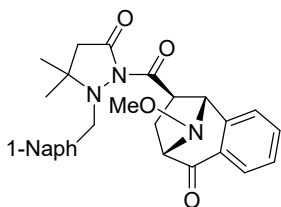

**(1R,9S,11R)-11-([5,5-Dimethyl-1-(1-naphthylmethyl)-3-oxo-2-pyrazolidinyl]carbonyl)-12-methoxy-8-oxo-12-azatricyclo[7.2.1.0<sup>2,7</sup>]dodeca-2,4,6-triene (*exo*-**3b**).** Colorless prisms; Mp. 183-185 °C; [ $\alpha$ ]<sub>D</sub><sup>25</sup> -10.2 (*c* 1.0, CHCl<sub>3</sub>, 99% ee); *R*<sub>f</sub> = 0.20 (Hexane:EtOAc = 70:30, v/v); <sup>1</sup>H NMR (300 MHz, C<sub>6</sub>D<sub>6</sub>)  $\delta$  0.73 (3H $\times$ 2/5, s), 0.76 (3H $\times$ 2/5, s), 0.767 (3H $\times$ 3/5, s), 0.774 (3H $\times$ 3/5, s), 1.75 (1H, m), 2.07 (1H $\times$ 3/5, d, *J* = 17.4 Hz), 2.09 (1H $\times$ 2/5, d, *J* = 16.8 Hz), 2.13 (1H $\times$ 2/5, d, *J* = 17.4 Hz), 2.26 (1H $\times$ 3/5, d, *J* = 16.8 Hz), 2.69 (1H $\times$ 2/5, ddd, *J* = 3.9, 8.2, 14.0 Hz), 3.12 (3H $\times$ 3/5, s), 3.20 (3H $\times$ 2/5, s), 3.43-3.53 (1H $\times$ 3/5+1H $\times$ 3/5, m), 3.62 (1H $\times$ 2/5, dd, *J* = 3.9, 10.3 Hz), 4.08 (1H $\times$ 2/5, d, *J* = 14.0 Hz), 4.18 (1H $\times$ 2/5, d, *J* = 14.0 Hz), 4.27 (1H $\times$ 3/5, d, *J* = 14.6 Hz), 4.28 (1H $\times$ 2/5, d, *J* = 8.2 Hz), 4.33 (1H $\times$ 3/5, d, *J* = 14.6 Hz), 4.54 (1H $\times$ 3/5, m), 4.90 (1H $\times$ 2/5, s), 5.16 (1H $\times$ 3/5, s), 6.98 (1H, m), 7.17-7.33 (3H, m), 7.38-7.48 (1H+1H $\times$ 2/5, m), 7.58 (1H, d, *J* = 8.1 Hz), 7.65 (1H, m), 7.79 (1H $\times$ 3/5+1H $\times$ 2/5, m), 7.98 (1H $\times$ 3/5, d, *J* = 6.9 Hz), 8.17 (1H $\times$ 3/5, dd, *J* = 1.3, 7.7 Hz), 8.22 (1H $\times$ 2/5, dd, *J* = 1.3, 7.7 Hz),

8.39 (1H×2/5, d,  $J = 8.4$  Hz), 8.47 (1H×3/5, d,  $J = 8.4$  Hz);  $^{13}\text{C}$  NMR (75 MHz,  $\text{C}_6\text{D}_6$ )  $\delta$  25.0 ( $\text{CH}_2$ ), 25.3 ( $\text{CH}_3$ ), 25.7 ( $\text{CH}_3$ ), 25.8 ( $\text{CH}_3$ ), 25.9 ( $\text{CH}_2$ ), 26.2 ( $\text{CH}_3$ ), 43.1 ( $\text{CH}_2$ ), 43.6 ( $\text{CH}_2$ ), 48.0 ( $\text{CH}$ ), 52.6 ( $\text{CH}$ ), 54.3 ( $\text{CH}_2$ ), 54.7 ( $\text{CH}_2$ ), 59.4 ( $\text{CH}_3$ ), 60.4 ( $\text{CH}_3$ ), 60.70 ( $\text{C}$ ), 60.74 ( $\text{C}$ ), 65.7 ( $\text{CH}$ ), 68.0 ( $\text{CH}$ ), 73.4 ( $\text{CH}$ ), 75.5 ( $\text{CH}$ ), 124.4 ( $\text{CH}$ ), 124.5 ( $\text{CH}$ ), 125.6 ( $\text{CH}$ ), 125.7 ( $\text{CH}$ ), 125.89 ( $\text{CH}$ ), 125.94 ( $\text{CH}$ ), 126.0 ( $\text{CH}$ ), 126.2 (2CH), 127.2 ( $\text{CH}$ ), 127.7 ( $\text{CH}$ ), 127.8 ( $\text{CH}$ ), 128.0 ( $\text{CH}$ ), 128.1 ( $\text{CH}$ ), 128.2 ( $\text{CH}$ ), 128.35 (2CH), 128.44 ( $\text{CH}$ ), 129.05 ( $\text{CH}$ ), 129.10 ( $\text{CH}$ ), 130.4 ( $\text{C}$ ), 131.1 ( $\text{C}$ ), 131.8 ( $\text{C}$ ), 132.1 ( $\text{C}$ ), 133.7 ( $\text{CH}$ ), 134.0 ( $\text{C}$ ), 134.1 ( $\text{CH}$ ), 134.28 ( $\text{C}$ ), 134.31 ( $\text{C}$ ), 134.6 ( $\text{C}$ ), 141.6 ( $\text{C}$ ), 145.4 ( $\text{C}$ ), 168.1 ( $\text{C}$ ), 168.6 ( $\text{C}$ ), 173.7 ( $\text{C}$ ), 173.8 ( $\text{C}$ ), 195.0 ( $\text{C}$ ), 196.6 ( $\text{C}$ ); IR (KBr) 3058, 2970, 2936, 1743, 1698, 1602, 1460, 1305, 1241, 1044, 800, 752  $\text{cm}^{-1}$ ; HRMS (ESI): Exact mass calcd for  $\text{C}_{29}\text{H}_{29}\text{N}_3\text{NaO}_4$   $[\text{M}+\text{Na}]^+$  506.2060, found 506.2047. The  $^1\text{H}$  and  $^{13}\text{C}$  NMR analysis showed that *exo*-**3b** exists as a 3:2 mixture of nitrogen invertomers at room temperature. The enantiomeric excess of *exo*-**3b** was determined by chiral-phase HPLC after hydrogenation.

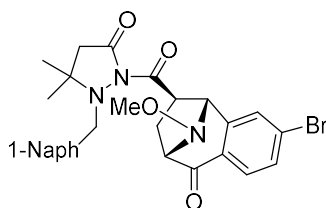

**(1R,9S,11R)-4-Bromo-11-{{[5,5-dimethyl-1-(1-naphthylmethyl)-3-oxo-2-pyrazolidinyl]carbonyl}-12-methoxy-8-oxo-12-azatricyclo[7.2.1.0<sup>2,7</sup>]dodeca-2,4,6-triene (*exo*-**3c**).** Isolated as colorless prisms (217.8 mg, 77%, *exo:endo* = >99:1) by silica gel column chromatography (30 g, Hexane:EtOAc = 85:15, v/v) following the general procedure using *O*-methyloxime **1b** (141.0 mg, 0.50 mmol). Mp. 172-173 °C;  $[\alpha]_{\text{D}}^{26}$  -8.44 ( $c$  1.0,  $\text{CHCl}_3$ , 95% ee);  $R_f = 0.20$  (Hexane:EtOAc = 70:30, v/v);  $^1\text{H}$  NMR (300 MHz,  $\text{C}_6\text{D}_6$ )  $\delta$  0.75 (3H×1/2, s), 0.77 (3H+3H×1/2, s), 1.63 (1H×1/2, ddd,  $J = 0.7, 9.5, 14.2$  Hz), 1.69 (1H×1/2, ddd,  $J = 10.5, 14.0$  Hz), 2.07 (1H×1/2, d,  $J = 17.5$  Hz), 2.10 (1H×1/2, d,  $J = 17.0$  Hz), 2.13 (1H×1/2, d,  $J = 17.5$  Hz), 2.21 (1H×1/2, d,  $J = 17.0$  Hz), 2.59 (1H×1/2, ddd,  $J = 4.1, 8.1, 14.0$  Hz), 3.11 (3H×1/2, s), 3.17 (3H×1/2, s), 3.20-3.46 (1H+1H×1/2, m), 4.04 (1H×1/2, d,  $J = 13.8$  Hz), 4.16 (1H×1/2, m), 4.17 (1H×1/2, d,  $J = 14.3$  Hz), 4.22 (1H×1/2, d,  $J = 13.8$  Hz), 4.30 (1H×1/2, d,  $J = 14.3$  Hz), 4.45 (1H×1/2, d,  $J = 8.0$  Hz), 4.69 (1H×1/2, s), 4.95 (1H×1/2, s), 7.09 (1H, dd,  $J = 1.8, 8.2$  Hz), 7.20-7.32 (2H, m), 7.41 (1H, m), 7.53-7.73 (1H×1/2+2H+1H×1/2, m), 7.76 (1H×1/2, d,  $J = 8.2$  Hz), 7.82 (1H×1/2, d,  $J = 8.2$

Hz), 7.87-8.00 (1H×1/2+1H×1/2, m), 8.35 (1H×1/2, d,  $J = 8.4$  Hz), 8.44 (1H×1/2, d,  $J = 8.5$  Hz);  $^{13}\text{C}$  NMR (75 MHz,  $\text{C}_6\text{D}_6$ )  $\delta$  24.9 (2CH<sub>2</sub>), 25.5 (CH<sub>3</sub>), 25.7 (CH<sub>3</sub>), 25.9 (CH<sub>3</sub>), 26.1 (CH<sub>3</sub>), 42.9 (CH<sub>2</sub>), 43.4 (CH<sub>2</sub>), 47.7 (CH), 52.2 (CH), 54.4 (CH<sub>2</sub>), 54.9 (CH<sub>2</sub>), 59.5 (CH<sub>3</sub>), 60.5 (CH<sub>3</sub>), 60.9 (C), 61.0 (C), 65.0 (CH), 68.0 (CH), 72.5 (CH), 75.3 (CH), 124.2 (CH), 124.3 (CH), 125.5 (CH), 125.7 (CH), 125.9 (CH), 126.0 (CH), 126.3 (CH), 127.7 (CH), 127.9 (CH), 128.2 (CH), 128.27 (CH), 128.33 (CH), 128.6 (CH), 128.7 (CH), 128.98 (C), 129.05 (CH, C), 129.1 (CH), 129.2 (C), 129.7 (C), 130.9 (2CH), 131.3 (CH), 131.7 (CH), 131.9 (C), 132.2 (C), 133.7 (C), 134.21 (C), 134.23 (C), 134.3 (C), 143.4 (C), 146.9 (C), 167.8 (C), 168.2 (C), 173.8 (C), 174.0 (C), 194.1(C), 195.9 (C); IR (KBr) 3063, 2968, 2933, 1744, 1702, 1590, 1308, 1240, 798, 778, 695  $\text{cm}^{-1}$ ; HRMS (ESI): Exact mass calcd for  $\text{C}_{29}\text{H}_{28}\text{BrN}_3\text{NaO}_4$   $[\text{M}+\text{Na}]^+$  584.1155, found 584.1151. The  $^1\text{H}$  and  $^{13}\text{C}$  NMR analysis showed that *exo*-**3c** exists as a 1:1 mixture of nitrogen invertomers at room temperature. The enantiomeric excess of *exo*-**3c** was determined by chiral-phase HPLC after hydrogenation.

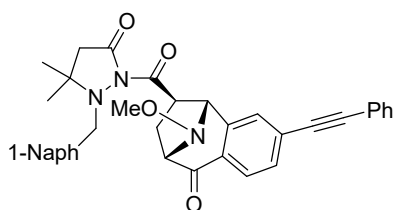

**(1R,9S,11R)-11-([5,5-Dimethyl-1-(1-naphthylmethyl)-3-oxo-2-pyrazolidinyl]carbonyl)-12-methoxy-8-oxo-4-phenylethynyl-12-azatricyclo[7.2.1.0<sup>2,7</sup>]dodeca-2,4,6-triene (*exo*-**3d**).** Isolated as colorless prisms (194.7 mg, 67%, *exo:endo* = >99:1) by silica gel column chromatography (30 g, Hexane:EtOAc = 85:15, v/v) following the general procedure (reaction temperature: 50 °C) using *O*-methyloxime **1c** (151.6 mg, 0.50 mmol),  $\text{Cu}(\text{OTf})_2$  (54.3 mg, 0.15 mmol), and ligand **E** (84.9 mg, 0.15 mmol). Mp. 105-106 °C;  $[\alpha]_{\text{D}}^{26}$  -71.1 ( $c$  1.0,  $\text{CHCl}_3$ , 91% ee);  $R_f$  = 0.20 (Hexane:EtOAc = 70:30, v/v);  $^1\text{H}$  NMR (300 MHz,  $\text{C}_6\text{D}_6$ )  $\delta$  0.75 (3H×1/2, s), 0.77 (3H×1/2, s), 0.79 (3H×1/2, s), 0.80 (3H×1/2, s), 1.74 (1H, m), 2.11 (1H×1/2, d,  $J = 17.1$  Hz), 2.15 (1H×1/2, d,  $J = 16.8$  Hz), 2.17 (1H×1/2, d,  $J = 17.1$  Hz), 2.25 (1H×1/2, d,  $J = 16.8$  Hz), 2.65 (1H×1/2, ddd,  $J = 4.0, 8.1, 13.7$  Hz), 3.15 (3H×1/2, s), 3.21 (3H×1/2, s), 3.31-3.66 (1H+1H×1/2, m), 4.07 (1H×1/2, d,  $J = 13.8$  Hz), 4.20 (1H×1/2, d,  $J = 13.8$  Hz), 4.23-4.30 (1H×1/2+1H×1/2, m), 4.34 (1H×1/2, d,  $J = 14.5$  Hz), 4.52 (1H×1/2, d,  $J = 7.7$  Hz), 4.83 (1H×1/2, s), 5.11 (1H×1/2, s), 6.96-7.07 (3H, m), 7.20-7.32 (2H, m), 7.34 (1H×1/2, d,  $J = 8.0$  Hz), 7.35

(1H×1/2, d,  $J = 8.0$  Hz), 7.37-7.52 (3H, m), 7.60 (1H×1/2, d,  $J = 8.2$  Hz), 7.61 (1H×1/2, d,  $J = 8.1$  Hz), 7.66 (1H, d,  $J = 8.2$  Hz), 7.69 (1H×1/2, s), 7.74 (1H×1/2, d,  $J = 7.1$  Hz), 7.94 (1H×1/2, d,  $J = 7.0$  Hz), 8.04 (1H×1/2, d,  $J = 8.0$  Hz), 8.07 (1H×1/2, s), 8.09 (1H×1/2, d,  $J = 7.9$  Hz), 8.37 (1H×1/2, d,  $J = 8.4$  Hz), 8.45 (1H×1/2, d,  $J = 8.5$  Hz);  $^{13}\text{C}$  NMR (75 MHz,  $\text{C}_6\text{D}_6$ )  $\delta$  25.1 ( $\text{CH}_2$ ), 25.5 ( $\text{CH}_3$ ), 25.6 ( $\text{CH}_3$ ), 26.0 ( $2\text{CH}_3$ ), 26.2 ( $\text{CH}_2$ ), 43.0 ( $\text{CH}_2$ ), 43.5 ( $\text{CH}_2$ ), 47.8 ( $\text{CH}$ ), 52.4 ( $\text{CH}$ ), 54.4 ( $\text{CH}_2$ ), 54.8 ( $\text{CH}_2$ ), 59.5 ( $\text{CH}_3$ ), 60.4 ( $\text{CH}_3$ ), 60.8 (C), 60.9 (C), 65.3 ( $\text{CH}$ ), 68.1 ( $\text{CH}$ ), 72.9 ( $\text{CH}$ ), 75.4 ( $\text{CH}$ ), 89.7 (C), 89.9 (C), 93.3 (C), 93.4 (C), 123.3 (C), 123.4 (C), 124.3 ( $\text{CH}$ ), 124.4 ( $\text{CH}$ ), 125.6 ( $\text{CH}$ ), 125.7 ( $\text{CH}$ ), 125.9 ( $\text{CH}$ ), 126.0 ( $\text{CH}$ ), 126.1 ( $\text{CH}$ ), 126.27 ( $\text{CH}$ ), 126.29 ( $\text{CH}$ ), 127.3 ( $\text{CH}$ ), 127.8 ( $\text{CH}$ ), 128.2 ( $\text{CH}$ ), 128.4 ( $\text{CH}$ ), 128.5 ( $\text{CH}$ ), 128.6 ( $\text{CH}$ ), 128.70 ( $\text{CH}$ ), 128.72 ( $\text{CH}$ ), 128.9 ( $\text{CH}$ ), 129.0 ( $\text{CH}$ ), 129.1 ( $\text{CH}$ , C), 129.4 (C), 129.7 (C), 130.3 (C), 130.9 ( $\text{CH}$ ), 131.1 ( $\text{CH}$ ), 131.2 ( $\text{CH}$ ), 131.5 ( $\text{CH}$ ), 131.9 (C), 132.1 ( $\text{CH}$ ), 132.2 ( $\text{CH}$ , C), 133.8 (C), 134.25 (C), 134.27 (C), 134.5 (C), 141.8 (C), 145.5 (C), 168.0 (C), 168.4 (C), 173.7 (C), 173.9 (C), 194.3 (C), 196.1 (C); IR (KBr) 3058, 2969, 2938, 2210, 1743, 1698, 1603, 1443, 1307, 1043, 798, 757, 691  $\text{cm}^{-1}$ ; HRMS (ESI): Exact mass calcd for  $\text{C}_{37}\text{H}_{33}\text{N}_3\text{NaO}_4$   $[\text{M}+\text{Na}]^+$  606.2362, found 606.2361. The  $^1\text{H}$  and  $^{13}\text{C}$  NMR analysis showed that *exo*-**3d** exists as a 1:1 mixture of nitrogen invertomers at room temperature. The enantiomeric excess of *exo*-**3d** was determined by chiral-phase HPLC analysis (Daicel Chiralpak AD-3, Hexane:*i*-PrOH = 90:10, v/v, detector: UV 254 nm, flow rate = 0.5 mL/min, 35 °C):  $t_{\text{minor}} = 41.9$  min,  $t_{\text{major}} = 53.6$  min.

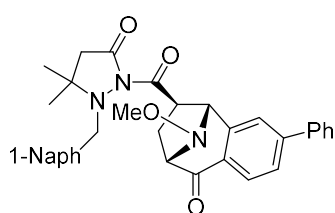

**(1R,9S,11R)-11-([5,5-Dimethyl-1-(1-naphthylmethyl)-3-oxo-2-pyrazolidinyl]carbonyl)-12-methoxy-8-oxo-4-phenyl-12-azatricyclo[7.2.1.0<sup>2,7</sup>]dodeca-2,4,6-triene (*exo*-**3e**)**. Isolated as colorless prisms (184.8 mg, 66%, *exo:endo* = >99:1) by silica gel column chromatography (30 g, Hexane:EtOAc = 85:15, v/v) following the general procedure (reaction temperature: 50 °C) using *O*-methyloxime **1d** (139.6 mg, 0.50 mmol),  $\text{Cu}(\text{OTf})_2$  (54.3 mg, 0.15 mmol), and ligand **E** (84.9 mg, 0.15 mmol). Mp. 235-237 °C;  $[\alpha]_{\text{D}}^{25} -51.4$  ( $c$  1.0,  $\text{CHCl}_3$ , 95% ee);  $R_f = 0.20$  (Hexane:EtOAc = 70:30, v/v);  $^1\text{H}$  NMR (300 MHz,  $\text{C}_6\text{D}_6$ )  $\delta$  0.71 (3H×2/5, s), 0.75 (3H+3H×3/5, s), 1.79 (1H×3/5, ddd,  $J = 0.8, 10.1, 14.2$  Hz), 1.85

(1H×2/5, dd,  $J = 10.2, 14.1$  Hz), 2.06 (1H×3/5, d,  $J = 17.4$  Hz), 2.08 (1H×2/5, d,  $J = 16.8$  Hz), 2.11 (1H×2/5, d,  $J = 17.4$  Hz), 2.21 (1H×3/5, d,  $J = 16.8$  Hz), 2.71 (1H×3/5, ddd,  $J = 3.9, 8.3, 14.2$  Hz), 3.16 (3H×3/5, s), 3.25 (3H×2/5, s), 3.41-3.57 (1H×3/5+1H×3/5, m), 3.62 (1H×2/5, m), 4.05 (1H×3/5, d,  $J = 14.0$  Hz), 4.18 (1H×3/5, d,  $J = 14.0$  Hz), 4.25 (1H×2/5, d,  $J = 14.5$  Hz), 4.32 (1H×2/5, m), 4.33 (1H×2/5, d,  $J = 14.5$  Hz), 4.58 (1H×3/5, m), 4.97 (1H×2/5, s), 5.22 (1H×3/5, s), 7.06-7.22 (3H, m), 7.22-7.34 (3H, m), 7.41 (1H, m), 7.46-7.66 (4H, m), 7.74 (1H×2/5, s), 7.75 (1H×2/5, d,  $J = 6.6$  Hz), 7.93 (1H×3/5, d,  $J = 7.0$  Hz), 8.10 (1H×3/5, s), 8.21 (1H×3/5, d,  $J = 8.0$  Hz), 8.27 (1H×2/5, d,  $J = 8.0$  Hz), 8.38 (1H×2/5, d,  $J = 8.6$  Hz), 8.49 (1H×3/5, d,  $J = 8.5$  Hz);  $^{13}\text{C}$  NMR (75 MHz,  $\text{C}_6\text{D}_6$ )  $\delta$  25.2 ( $\text{CH}_2$ ), 25.3 ( $\text{CH}_3$ ), 25.6 ( $\text{CH}_3$ ), 25.9 ( $\text{CH}_3$ ), 26.1 ( $\text{CH}_3$ ), 26.3 ( $\text{CH}_2$ ), 43.0 ( $\text{CH}_2$ ), 43.6 ( $\text{CH}_2$ ), 48.1 ( $\text{CH}$ ), 52.6 ( $\text{CH}$ ), 54.4 ( $\text{CH}_2$ ), 54.8 ( $\text{CH}_2$ ), 59.4 ( $\text{CH}_3$ ), 60.5 ( $\text{CH}_3$ ), 60.7 (C), 60.8 (C), 65.9 ( $\text{CH}$ ), 68.2 ( $\text{CH}$ ), 73.5 ( $\text{CH}$ ), 75.6 ( $\text{CH}$ ), 124.4 ( $\text{CH}$ ), 124.5 ( $\text{CH}$ ), 125.5 ( $\text{CH}$ ), 125.7 ( $\text{CH}$ ), 125.9 ( $\text{CH}$ ), 126.0 ( $\text{CH}$ ), 126.3 (2CH), 126.5 ( $\text{CH}$ ), 126.6 ( $\text{CH}$ ), 126.7 ( $\text{CH}$ ), 126.9 ( $\text{CH}$ ), 127.2 (2CH), 127.8 ( $\text{CH}$ ), 127.85 ( $\text{CH}$ ), 127.89 ( $\text{CH}$ ), 128.1 ( $\text{CH}$ ), 128.2 ( $\text{CH}$ ), 128.4 (2CH), 128.5 (C), 128.9 (C), 129.0 ( $\text{CH}$ ), 129.07 ( $\text{CH}$ ), 129.10 ( $\text{CH}$ ), 129.2 ( $\text{CH}$ ), 129.9 (C), 131.9 (C), 132.2 (C), 133.9 (C), 134.27 (C), 134.29 (C), 134.5 (C), 140.6 (C), 140.7 (C), 142.2 (C), 145.9 (C), 146.7 (C), 147.1 (C), 168.1 (C), 168.6 (C), 173.7 (C), 173.9 (C), 194.7 (C), 196.4 (C); IR (KBr) 3063, 2963, 2938, 1699, 1607, 1304, 1233, 801, 766, 699  $\text{cm}^{-1}$ ; HRMS (ESI): Exact mass calcd for  $\text{C}_{35}\text{H}_{33}\text{N}_3\text{NaO}_4$   $[\text{M}+\text{Na}]^+$  582.2347, found 582.2371. The  $^1\text{H}$  and  $^{13}\text{C}$  NMR analysis showed that *exo*-**3e** exists as a 3:2 mixture of nitrogen invertomers at room temperature. The enantiomeric excess of *exo*-**3e** was determined by chiral-phase HPLC after hydrogenation.

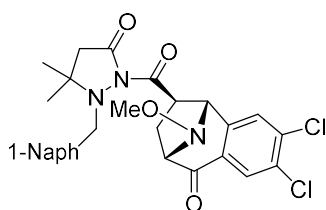

**(1R,9S,11R)-4,5-Dichloro-11-([5,5-dimethyl-1-(1-naphthylmethyl)-3-oxo-2-pyrazolidinyl]-carbonyl)-12-methoxy-8-oxo-12-azaticyclo[7.2.1.0<sup>2,7</sup>]dodeca-2,4,6-triene (*exo*-**3f**).** Isolated as colorless prisms (199.7 mg, 72%, *exo:endo* = >99:1) by silica gel column chromatography (30 g, Hexane:EtOAc = 85:15, v/v) following the general procedure using *O*-methyl oxime **1e** (136.0 mg, 0.50 mmol). Mp. 155-157 °C;  $[\alpha]_{\text{D}}^{26}$  -3.02 ( $c$  1.0,  $\text{CHCl}_3$ , 90% ee);  $R_f$  = 0.20 (Hexane:EtOAc = 70:30, v/v);

$^1\text{H}$  NMR (300 MHz,  $\text{C}_6\text{D}_6$ )  $\delta$  0.76 (3H+3H $\times$ 1/2, s), 0.78 (3H $\times$ 1/2, s), 1.64 (1H, m), 2.07 (1H $\times$ 1/2, d,  $J$  = 17.2 Hz), 2.10 (1H $\times$ 1/2, d,  $J$  = 16.9 Hz), 2.14 (1H $\times$ 1/2, d,  $J$  = 17.2 Hz), 2.20 (1H $\times$ 1/2, d,  $J$  = 16.9 Hz), 2.51 (1H $\times$ 1/2, m), 3.11 (3H $\times$ 1/2, s), 3.17 (3H $\times$ 1/2, s), 3.18-3.42 (1H+1H $\times$ 1/2, m), 3.99 (1H $\times$ 1/2, d,  $J$  = 13.6 Hz), 4.11 (1H $\times$ 1/2, d,  $J$  = 7.8 Hz), 4.18 (1H $\times$ 1/2, d,  $J$  = 13.6 Hz), 4.18 (1H $\times$ 1/2, d,  $J$  = 14.2), 4.30 (1H $\times$ 1/2, d,  $J$  = 14.2 Hz), 4.39 (1H $\times$ 1/2, d,  $J$  = 7.9 Hz), 4.62 (1H $\times$ 1/2, s), 4.87 (1H $\times$ 1/2, s), 7.20-7.31 (2H+1H $\times$ 1/2, m), 7.40 (1H, m), 7.55-7.75 (3H, m), 7.86 (1H $\times$ 1/2, brs), 8.00 (1H $\times$ 1/2, s), 8.07 (1H $\times$ 1/2, s), 8.31 (1H $\times$ 1/2, d,  $J$  = 8.4 Hz), 8.40 (1H $\times$ 1/2, d,  $J$  = 8.0 Hz);  $^{13}\text{C}$  NMR (75 MHz,  $\text{C}_6\text{D}_6$ )  $\delta$  25.0 ( $\text{CH}_2$ ), 25.5 ( $\text{CH}_3$ ), 25.6 ( $\text{CH}_3$ ), 25.9 ( $\text{CH}_3$ ), 26.1 ( $\text{CH}_3$ ), 26.3 ( $\text{CH}_2$ ), 42.9 ( $\text{CH}_2$ ), 43.4 ( $\text{CH}_2$ ), 47.6 ( $\text{CH}$ ), 52.1 ( $\text{CH}$ ), 54.5 ( $\text{CH}_2$ ), 55.0 ( $\text{CH}_2$ ), 59.5 ( $\text{CH}_3$ ), 60.5 ( $\text{CH}_3$ ), 60.9 (C), 61.0 (C), 64.3 ( $\text{CH}$ ), 67.7 ( $\text{CH}$ ), 71.8 ( $\text{CH}$ ), 75.0 ( $\text{CH}$ ), 124.1 ( $\text{CH}$ ), 124.2 ( $\text{CH}$ ), 125.5 ( $\text{CH}$ ), 125.7 ( $\text{CH}$ ), 125.95 ( $\text{CH}$ ), 126.02 ( $\text{CH}$ ), 126.3 ( $\text{CH}$ ), 126.4 ( $\text{CH}$ ), 127.9 ( $\text{CH}$ ), 128.4 ( $\text{CH}$ ), 128.6 (2 $\text{CH}$ ), 128.7 ( $\text{CH}$ ), 128.9 ( $\text{CH}$ ), 129.0 ( $\text{CH}$ ), 129.1 ( $\text{CH}$ ), 129.7 ( $\text{CH}$ ), 129.8 (C), 129.9 ( $\text{CH}$ ), 130.5 (C), 131.9 (C), 132.2 (C), 132.7 (C), 133.1 (C), 133.4 (C), 134.1 (C), 134.20 (C), 134.23 (C), 138.0 (C), 138.3 (C), 141.0 (C), 144.4 (C), 167.7 (C), 168.0 (C), 173.9 (C), 174.0 (C), 192.8 (C), 194.7 (C); IR (KBr) 3049, 2968, 2933, 1744, 1707, 1592, 1304, 1240, 1043, 907, 798, 779  $\text{cm}^{-1}$ ; HRMS (ESI): Exact mass calcd for  $\text{C}_{29}\text{H}_{27}\text{N}_3\text{NaO}_4$  [ $\text{M}+\text{Na}$ ] $^+$  574.1271, found 574.1250. The  $^1\text{H}$  and  $^{13}\text{C}$  NMR showed that compound *exo*-**3f** exists as a 1:1 mixture of nitrogen invertomers at room temperature. The enantiomeric excess of *exo*-**3f** was determined by chiral-phase HPLC analysis (Daicel Chiralpak AD-3, Hexane:*i*-PrOH = 90:10, v/v, detector: UV 254 nm, flow rate = 0.5 mL/min, 35  $^\circ\text{C}$ )  $t_{\text{minor}}$  = 33.6 min,  $t_{\text{major}}$  = 42.1 min.

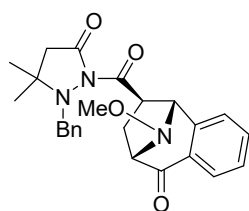

**(1R,9S,11R)-11-[(1-Benzyl-5,5-dimethyl-3-oxo-2-pyrazolidinyl)carbonyl]-12-methoxy-8-oxo-12-azatricyclo[7.2.1.0<sup>2,7</sup>]dodeca-2,4,6-triene (*exo*-**3a**)**. Isolated as colorless prisms (154.0 mg, 71%, *exo:endo* = 98:2) by silica gel column chromatography (15 g, Hexane:EtOAc = 85:15 – 70:30, v/v) following the general procedure (reaction temperature: 26  $^\circ\text{C}$ , under an argon atmosphere) using *O*-methyloxime **1a** (101.6 mg, 0.50 mmol), acryloylpyrazolidinone **2a** (258.3 mg, 1.0 mmol),



Ni(ClO<sub>4</sub>)<sub>2</sub>•6H<sub>2</sub>O (36.6 mg, 0.10 mmol), and ligand **A** (59.1 mg, 0.10 mmol). Mp. 210-211 °C; [ $\alpha$ ]<sub>D</sub><sup>25</sup> -22.9 (*c* 1.0, CHCl<sub>3</sub>, *exo:endo* = 82:18, 63% ee (*exo*)); R<sub>f</sub> = 0.43 (Hexane:EtOAc = 50:50, v/v); <sup>1</sup>H NMR (400 MHz, CDCl<sub>3</sub>)  $\delta$  1.25 (3H×3/5, s), 1.26 (3H×2/5, s), 1.28 (3H×3/5, s), 1.29 (3H×2/5, s), 1.86 (1H×3/5, dd, *J* = 9.4, 13.9 Hz), 1.98 (1H×2/5, dd, *J* = 10.3, 14.1 Hz), 2.55 (1H×3/5, d, *J* = 16.8 Hz), 2.59 (1H×2/5, d, *J* = 16.8 Hz), 2.67 (1H×2/5, d, *J* = 16.8 Hz), 2.70 (1H×2/5, ddd, *J* = 4.1, 7.6, 14.1 Hz), 2.74 (1H×3/5, d, *J* = 16.8 Hz), 3.35 (1H×3/5, ddd, *J* = 4.1, 8.2, 13.9 Hz), 3.47 (3H, s), 3.58 (1H×3/5, dd, *J* = 4.1, 9.4 Hz), 3.67 (1H×2/5, dd, *J* = 4.1, 10.3 Hz), 4.11 (1H×3/5, d, *J* = 14.5 Hz), 4.13 (1H×2/5, d, *J* = 13.7 Hz), 4.17 (1H×2/5, d, *J* = 13.7 Hz), 4.18 (1H×2/5, d, *J* = 7.6 Hz), 4.20 (1H×3/5, d, *J* = 14.5 Hz), 4.44 (1H×3/5, d, *J* = 8.2 Hz), 4.75 (1H×2/5, s), 5.03 (1H×3/5, s), 7.22-7.35 (3H, m), 7.38-7.44 (1H+1H×2/5, m), 7.48-7.54 (2H, m), 7.60 (1H, m), 7.67 (1H×3/5, m), 7.99 (1H, m); <sup>13</sup>C NMR (100 MHz, CDCl<sub>3</sub>)  $\delta$  24.6 (CH<sub>2</sub>), 25.5 (CH<sub>2</sub>), 25.7 (CH<sub>3</sub>), 25.8 (CH<sub>3</sub>), 26.6 (CH<sub>3</sub>), 26.8 (CH<sub>3</sub>), 43.5 (CH<sub>2</sub>), 43.9 (CH<sub>2</sub>), 47.1 (CH), 51.6 (CH), 56.2 (CH<sub>2</sub>), 56.5 (CH<sub>2</sub>), 59.8 (CH<sub>3</sub>), 60.7 (CH<sub>3</sub>), 60.8 (2CH), 64.7 (CH, C), 67.4 (CH), 72.5 (CH), 74.8 (CH), 125.4 (CH), 126.8 (CH), 127.15 (2CH), 127.22 (CH), 127.3 (CH), 127.7 (CH), 128.0 (CH), 128.1 (2CH), 128.6 (CH), 128.7 (CH), 129.2 (C), 129.8 (C), 133.9 (CH), 134.4 (CH), 137.3 (C), 137.9 (C), 140.8 (C), 144.6 (C), 168.0 (C), 168.3 (C), 174.2 (2C), 195.4 (C), 197.2 (C); IR (KBr) 1736, 1696, 1373, 1335, 1263, 1238, 1200, 1179, 1049 cm<sup>-1</sup>; MS (EI) *m/z* 345 (M<sup>+</sup>), 232, 189, 170. Anal. calcd for C<sub>25</sub>H<sub>27</sub>N<sub>3</sub>O<sub>4</sub>: C, 69.27; H, 6.28; N, 9.73 %, found: C, 69.48; H, 6.18; N, 9.58 %. The <sup>1</sup>H and <sup>13</sup>C NMR showed that compound *exo-3a* exists as a 3:2 mixture of nitrogen invertomers at room temperature. The enantiomeric excess of *exo-3a* was determined by chiral-phase HPLC after hydrogenation.

**General procedure for the cycloaddition of the cyclic azomethine ylide generated from diazo isoxazoline 4, exemplified by the reaction of 3-[2-(2-diazoacetyl)phenyl]-4,4-diphenyl-2-isoxazoline (4e) with acryloylpyrazolidinone 2b.** To a 30 mL two-necked flask equipped with a stir bar was added MS 4A (254.0 mg), Ni(BF<sub>4</sub>)<sub>2</sub>•6H<sub>2</sub>O (34.0 mg, 0.10 mmol, 20 mol %), and ligand **A** (56.2 mg, 0.10 mmol, 20 mol %). After the flask was purged with argon, CHCl<sub>3</sub> (4.0 mL) was added, and then the mixture was stirred at 26 °C for 6 h. After the addition of Rh<sub>2</sub>(OAc)<sub>4</sub> (4.4 mg, 0.01 mmol, 2 mol %) and acryloylpyrazolidinone **2b** (308.4 mg, 1.0 mmol), a solution of isoxazoline **4e** (183.7 mg, 0.50 mmol) in

CHCl<sub>3</sub> (5.0 mL) was added dropwise over a period of 3 h at 50 °C using a syringe pump under an argon atmosphere. Subsequently, the syringe was washed with CHCl<sub>3</sub> (1.0 mL) and the wash was added to the reaction mixture. The mixture was filtered through a plug of silica gel-Celite (SiO<sub>2</sub>: 1.5 g), rinsed with a mixture of Hexane/EtOAc (25 mL/25 mL), and then concentrated. Flash column chromatography (SiO<sub>2</sub>: 20 g, Hexane:EtOAc = 85:15, v/v) yielded cycloadduct *endo*-**5e** (234.3 mg, 60%, *endo:exo* = >99:1).

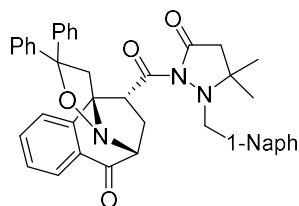

**(3a*S*,9*R*,11*R*)-11- $\{[5,5$ -Dimethyl-1-(1-naphthylmethyl)-3-oxo-2-pyrazolidinyl]carbonyl $\}$ -2,2-diphenyl-8-oxo-3,3a,8,9-tetrahydro-2*H*-3a,9-ethanoisoxazolo[2,3-*a*]isoquinoline (*endo*-**5e**).**

Colorless amorphous;  $[\alpha]_D^{25} = +61.0$  (*c* 1.0, CHCl<sub>3</sub>, 89% ee);  $R_f = 0.30$  (Hexane:EtOAc = 75:25, v/v); <sup>1</sup>H NMR (300 MHz, C<sub>6</sub>D<sub>6</sub>)  $\delta$  0.58 (3H, s), 0.60 (3H, s), 1.99 (1H, d, *J* = 17.0 Hz), 2.20 (1H, d, *J* = 17.0 Hz), 2.32 (1H, dd, *J* = 2.8, 12.4 Hz), 2.73 (1H, ddd, *J* = 7.2, 10.0, 12.4 Hz), 3.50 (1H, d, *J* = 12.2 Hz), 3.57 (1H, d, *J* = 14.5 Hz), 3.88 (1H, d, *J* = 14.5 Hz), 4.62 (1H, dd, *J* = 2.8, 10.0 Hz), 4.76 (1H, d, *J* = 12.2 Hz), 4.86 (1H, d, *J* = 7.2 Hz), 6.63 (1H, m), 6.88-6.98 (3H, m), 7.06-7.14 (4H, m), 7.25 (1H, m), 7.29-7.38 (3H, m), 7.47 (1H, d, *J* = 8.2 Hz), 7.58-7.65 (2H, m), 7.65-7.72 (2H, m), 7.82-7.88 (2H, m), 7.96 (1H, d, *J* = 7.7 Hz), 8.10 (1H, d, *J* = 8.4 Hz); <sup>13</sup>C NMR (75 MHz, C<sub>6</sub>D<sub>6</sub>)  $\delta$  25.1 (CH<sub>3</sub>), 26.0 (CH<sub>3</sub>), 32.1 (CH<sub>2</sub>), 43.4 (CH<sub>2</sub>), 49.8 (CH<sub>2</sub>), 52.3 (CH), 53.7 (CH<sub>2</sub>), 59.8 (C), 75.8 (CH), 81.9 (C), 88.1 (C), 123.9 (CH), 124.6 (CH), 125.7 (CH), 125.8 (CH), 126.0 (CH), 126.2 (CH), 126.79 (CH), 126.84 (CH), 127.4 (CH), 127.5 (CH), 127.6 (CH), 128.0 (CH), 128.4 (CH), 128.5 (CH), 128.6 (CH), 129.1 (CH), 131.5 (C), 132.7 (C), 133.1 (CH), 134.08 (C), 134.14 (C), 143.3 (C), 145.1 (C), 149.4 (C), 168.7 (C), 173.3 (C), 193.9 (C); IR (KBr) 2972, 1745, 1699, 1600, 1306, 1227, 800, 754, 700 cm<sup>-1</sup>; HRMS (ESI): Exact mass calcd for C<sub>42</sub>H<sub>37</sub>N<sub>3</sub>NaO<sub>4</sub> [M+Na]<sup>+</sup> 670.2676, found 670.2688. The enantiomeric excess of *endo*-**5e** was determined by chiral-phase HPLC analysis (Daicel Chiralpak AD-3, Hexane:*i*-PrOH = 90:10, v/v, detector: UV 254 nm, flow rate = 0.5 mL/min, 35 °C):  $t_{\text{major}} = 38.1$  min,  $t_{\text{minor}} = 45.5$  min.

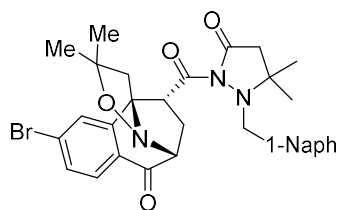

**(3a*S*,9*R*,11*R*)-5-Bromo-2,2-dimethyl-11-([5,5-dimethyl-1-(1-naphthylmethyl)-3-oxo-2-pyrazolidinyl]carbonyl)-8-oxo-3,3a,8,9-tetrahydro-2*H*-3a,9-ethanoisoxazolo[2,3-*a*]isoquinoline (*endo*-**5a**).** Isolated as colorless amorphous (200.8 mg, 67%, *endo:exo* = >99:1) by silica gel column chromatography (30 g, Toluene:EtOAc = 96:4, v/v) following the general procedure using diazo isoxazoline **4a** (161.0 mg, 0.50 mmol).  $[\alpha]_D^{22} +95.2$  (*c* 1.0, CHCl<sub>3</sub>, 96% ee);  $R_f = 0.35$  (Toluene:EtOAc = 90:10, v/v); <sup>1</sup>H NMR (300 MHz, C<sub>6</sub>D<sub>6</sub>)  $\delta$  0.59 (3H, s), 0.79 (3H, s), 1.37 (3H, s), 1.65 (3H, s), 2.03 (1H, d, *J* = 17.1 Hz), 2.12 (1H, d, *J* = 17.1 Hz), 2.15 (1H, d, *J* = 11.7 Hz), 2.26 (1H, dd, *J* = 4.2, 13.1 Hz), 2.67 (1H, ddd, *J* = 7.4, 10.3, 13.1 Hz), 3.14 (1H, d, *J* = 11.7 Hz), 3.90 (1H, d, *J* = 14.2 Hz), 4.04 (1H, d, *J* = 14.2 Hz), 4.64 (1H, d, *J* = 7.4 Hz), 5.07 (1H, dd, *J* = 4.2, 10.3 Hz), 6.78 (1H, dd, *J* = 1.8, 8.2 Hz), 7.18-7.30 (3H, m), 7.39 (1H, m), 7.51 (1H, d, *J* = 8.2 Hz), 7.62 (1H, d, *J* = 8.0 Hz), 7.71-7.75 (2H, m), 8.33 (1H, d, *J* = 8.5 Hz); <sup>13</sup>C NMR (75 MHz, CDCl<sub>3</sub>)  $\delta$  25.5 (CH<sub>3</sub>), 26.1 (CH<sub>3</sub>), 27.2 (CH<sub>3</sub>), 29.8 (CH<sub>3</sub>), 31.4 (CH<sub>2</sub>), 44.0 (CH<sub>2</sub>), 47.7 (CH<sub>2</sub>), 51.3 (CH), 53.8 (CH<sub>2</sub>), 60.3 (C), 74.1 (CH), 81.1 (C), 81.2 (C), 123.5 (CH), 125.3 (CH), 125.6 (CH), 126.1 (CH), 127.8 (CH), 128.08 (CH), 128.13 (CH), 128.4 (C), 128.65 (CH), 128.72 (CH), 130.1 (C), 131.3 (C), 131.4 (CH), 132.7 (C), 133.6 (C), 145.2 (C), 169.1 (C), 174.3 (C), 193.4 (C); IR (KBr) 2974, 1742, 1702, 1592, 1308, 1227, 887, 791, 680, 616 cm<sup>-1</sup>; HRMS (ESI): Exact mass calcd for C<sub>32</sub>H<sub>32</sub>BrN<sub>3</sub>NaO<sub>4</sub> [M+Na]<sup>+</sup> 624.1468, found 624.1479. The enantiomeric excess of *endo*-**5a** was determined by chiral-phase HPLC analysis (Daicel Chiralpak AD-3, Hexane:*i*-PrOH = 90:10, v/v, detector: UV 254 nm, flow rate = 0.5 mL/min, 35 °C):  $t_{\text{major}} = 30.2$  min,  $t_{\text{minor}} = 51.5$  min.

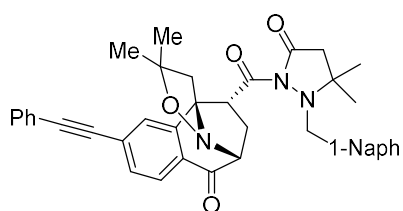

**(3a*S*,9*R*,11*R*)-2,2-Dimethyl-11-([5,5-dimethyl-1-(1-naphthylmethyl)-3-oxo-2-**

**pyrazolidinyl]carbonyl}-5-phenylethynyl-8-oxo-3,3a,8,9-tetrahydro-2H-3a,9-ethanoisoxazolo[2,3-a]isoquinoline (*endo*-5b).** Isolated as colorless prisms (212.6 mg, 68%, *endo:exo* = >99:1) by silica gel column chromatography (25 g, Toluene:EtOAc = 95:5, v/v) following the general procedure using diazo isoxazoline **4b** (171.7 mg, 0.50 mmol). Mp. 186-188 °C;  $[\alpha]_D^{26} +57.8$  (*c* 1.0, CHCl<sub>3</sub>, 94% ee);  $R_f = 0.56$  (Hexane:EtOAc = 75:25, v/v); <sup>1</sup>H NMR (300 MHz, C<sub>6</sub>D<sub>6</sub>)  $\delta$  0.58 (3H, s), 0.75 (3H, s), 1.43 (3H, s), 1.69 (3H, s), 1.98 (1H, d, *J* = 16.9 Hz), 2.13 (1H, d, *J* = 16.9 Hz), 2.31 (1H, d, *J* = 11.7 Hz), 2.40 (1H, dd, *J* = 4.2, 13.2 Hz), 2.73 (1H, ddd, *J* = 7.0, 10.2, 13.2 Hz), 3.33 (1H, d, *J* = 11.7 Hz), 3.93 (1H, d, *J* = 14.2 Hz), 4.12 (1H, d, *J* = 14.2 Hz), 4.70 (1H, d, *J* = 7.0 Hz), 5.13 (1H, dd, *J* = 4.2, 10.2 Hz), 6.97-7.05 (4H, m), 7.10-7.30 (3H, m), 7.36-7.48 (4H, m), 7.58 (1H, m), 7.80 (1H, d, *J* = 7.4 Hz), 7.96 (1H, d, *J* = 8.2 Hz), 8.35 (1H, d, *J* = 8.5 Hz); <sup>13</sup>C NMR (75 MHz, CDCl<sub>3</sub>)  $\delta$  25.1 (CH<sub>3</sub>), 26.4 (CH<sub>3</sub>), 27.2 (CH<sub>3</sub>), 29.9 (CH<sub>3</sub>), 31.3 (CH<sub>2</sub>), 44.1 (CH<sub>2</sub>), 47.8 (CH<sub>2</sub>), 51.3 (CH), 53.5 (CH<sub>2</sub>), 60.2 (C), 74.3 (CH), 81.2 (C), 81.3 (C), 88.6 (C), 93.1 (C), 122.5 (C), 123.4 (CH), 125.3 (CH), 125.4 (CH), 126.0 (CH), 127.1 (CH), 127.6 (CH), 127.8 (CH), 127.9 (CH), 128.1 (C), 128.3 (C), 128.4 (CH), 128.6 (CH), 128.9 (CH), 130.6 (C), 131.2 (CH), 131.7 (CH), 133.0 (C), 133.5 (C), 143.5 (C), 169.1 (C), 174.2 (C), 193.6 (C); IR (KBr) 2968, 2217, 1740, 1691, 1604, 1309, 1240, 802, 758, 688, 616 cm<sup>-1</sup>; HRMS (ESI): Exact mass calcd for C<sub>40</sub>H<sub>37</sub>N<sub>3</sub>NaO<sub>4</sub> [M+Na]<sup>+</sup> 646.2676, found 646.2677. The enantiomeric excess of *endo*-5b was determined by chiral-phase HPLC analysis (Daicel Chiralpak AD-3, Hexane:*i*-PrOH = 90:10, v/v, detector: UV 254 nm, flow rate = 0.5 mL/min, 35 °C):  $t_{\text{major}} = 27.0$  min,  $t_{\text{minor}} = 49.2$  min.

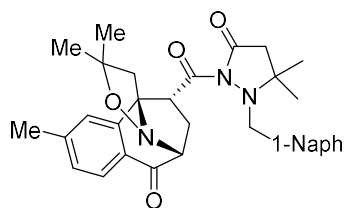

**(3a*S*,9*R*,11*R*)-2,2-Dimethyl-5-methyl-11-([5,5-dimethyl-1-(1-naphthylmethyl)-3-oxo-2-pyrazolidinyl]carbonyl)-8-oxo-3,3a,8,9-tetrahydro-2H-3a,9-ethanoisoxazolo[2,3-a]isoquinoline (*endo*-5c).** Isolated as colorless amorphous (144.7 mg, 54%, *endo:exo* = >99:1) by silica gel column chromatography (25 g, Hexane:EtOAc = 90:10, v/v and then 40 g, Toluene:EtOAc = 98:2, v/v) following the general procedure using diazo isoxazoline **4c** (128.6 mg, 0.50 mmol).  $R_f = 0.35$  (Hexane:EtOAc = 60:40, v/v); <sup>1</sup>H NMR (300 MHz, C<sub>6</sub>D<sub>6</sub>)  $\delta$  0.59 (3H, s), 0.67 (3H, s), 1.44 (3H, s), 1.73

(3H, s), 1.83 (3H, s), 2.03 (1H, d,  $J = 17.0$  Hz), 2.20 (1H, d,  $J = 17.0$  Hz), 2.37 (1H, dd,  $J = 4.3, 13.0$  Hz), 2.40 (1H, d,  $J = 11.6$  Hz), 2.72 (1H, ddd,  $J = 7.4, 10.3, 13.0$  Hz), 3.32 (1H, d,  $J = 11.6$  Hz), 3.85 (1H, d,  $J = 14.3$  Hz), 4.03 (1H, d,  $J = 14.3$  Hz), 4.72 (1H, d,  $J = 7.4$  Hz), 5.16 (1H, dd,  $J = 4.3, 10.3$  Hz), 6.51 (1H, dd,  $J = 0.9, 7.8$  Hz), 6.76 (1H, s), 7.15 (1H, m), 7.25 (1H, m), 7.35 (1H, m), 7.49 (1H, d,  $J = 8.1$  Hz), 7.60 (1H, d,  $J = 8.1$  Hz), 7.67 (1H, d,  $J = 7.0$  Hz), 8.07 (1H, d,  $J = 7.8$  Hz), 8.28 (1H, d,  $J = 8.6$  Hz);  $^{13}\text{C}$  NMR (75 MHz,  $\text{CDCl}_3$ )  $\delta$  21.7 ( $\text{CH}_3$ ), 25.2 ( $\text{CH}_3$ ), 26.5 ( $\text{CH}_3$ ), 27.2 ( $\text{CH}_3$ ), 29.8 ( $\text{CH}_3$ ), 31.2 ( $\text{CH}_2$ ), 43.9 ( $\text{CH}_2$ ), 47.7 ( $\text{CH}_2$ ), 51.1 (CH), 54.1 ( $\text{CH}_2$ ), 60.2 (C), 74.3 (CH), 81.0 (C), 81.5 (C), 123.3 (CH), 125.3 (CH), 125.5 (CH), 126.0 (CH), 127.2 (CH), 127.7 (CH), 128.0 (CH), 128.1 (C), 128.3 (CH), 128.7 (CH), 128.9 (CH), 131.2 (C), 132.8 (C), 133.6 (C), 143.5 (C), 144.2 (C), 169.3 (C), 174.1 (C), 194.1 (C); IR (KBr) 2970, 1697, 1609, 1226, 954, 888, 862, 803, 615  $\text{cm}^{-1}$ ; HRMS (ESI): Exact mass calcd for  $\text{C}_{33}\text{H}_{36}\text{N}_3\text{O}_4$   $[\text{M}+\text{H}]^+$  538.2700, found 538.2692. The enantiomeric excess of *endo*-**5c** was determined by chiral-phase HPLC analysis (Daicel Chiralpak AD-3, Hexane:*i*-PrOH = 93:7, v/v, detector: UV 254 nm, flow rate = 0.5 mL/min, 35 °C):  $t_{\text{major}} = 41.9$  min,  $t_{\text{minor}} = 88.3$  min.

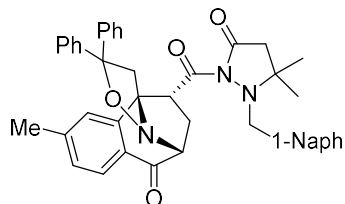

**(3a*S*,9*R*,11*R*)-5-Methyl-11-{{[5,5-dimethyl-1-(1-naphthylmethyl)-3-oxo-2-pyrazolidinyl]carbonyl}-2,2-diphenyl-8-oxo-3,3a,8,9-tetrahydro-2*H*-3a,9-ethanoisoxazolo[2,3-*a*]isoquinoline (*endo*-**5d**).** Isolated as colorless amorphous (185.2 mg, 56%, *endo:exo* = >99:1) by silica gel column chromatography (30 g, Toluene:EtOAc = 95:5 and then Hexane:EtOAc = 85:15, v/v) following the general procedure using diazo isoxazoline **4d** (190.7 mg, 0.50 mmol).  $[\alpha]_{\text{D}}^{25} +70.3$  ( $c$  1.0,  $\text{CHCl}_3$ , 88% ee);  $R_f = 0.33$  (Hexane:EtOAc = 60:40, v/v);  $^1\text{H}$  NMR (300 MHz,  $\text{C}_6\text{D}_6$ )  $\delta$  0.53 (3H, s), 0.56 (3H, s), 1.82 (3H, s), 1.96 (1H, d,  $J = 17.0$  Hz), 2.15 (1H, d,  $J = 17.0$  Hz), 2.40 (1H, dd,  $J = 3.2, 12.8$  Hz), 2.77 (1H, ddd,  $J = 7.0, 10.1, 12.8$  Hz), 3.52 (1H, d,  $J = 12.1$  Hz), 3.62 (1H, d,  $J = 14.3$  Hz), 3.85 (1H, d,  $J = 14.3$  Hz), 4.66 (1H, dd,  $J = 3.2, 10.1$  Hz), 4.78 (1H, d,  $J = 12.1$  Hz), 4.88 (1H, d,  $J = 6.9$  Hz), 6.42 (1H, dd,  $J = 0.8, 7.8$  Hz), 6.80 (1H, s), 6.95 (1H, m), 7.08-7.17 (4H, m), 7.23 (1H, m), 7.30-7.36 (3H, m), 7.46 (1H, d,  $J = 8.2$  Hz), 7.56-7.65 (2H, m), 7.68-7.73 (2H, m), 7.84-7.89 (2H, m), 7.95

(1H, d,  $J = 7.8$  Hz), 8.17 (1H, d,  $J = 8.4$  Hz);  $^{13}\text{C}$  NMR (75 MHz,  $\text{CDCl}_3$ )  $\delta$  21.8 ( $\text{CH}_3$ ), 25.3 ( $\text{CH}_3$ ), 26.3 ( $\text{CH}_3$ ), 31.4 ( $\text{CH}_2$ ), 43.5 ( $\text{CH}_2$ ), 49.2 ( $\text{CH}_2$ ), 51.7 ( $\text{CH}$ ), 53.9 ( $\text{CH}_2$ ), 60.4 (C), 74.6 ( $\text{CH}$ ), 80.9 (C), 87.3 (C), 123.2 ( $\text{CH}$ ), 125.2 ( $\text{CH}$ ), 125.4 (2CH), 125.5 ( $\text{CH}$ ), 125.8 ( $\text{CH}$ ), 126.1 ( $\text{CH}$ ), 126.6 ( $\text{CH}$ ), 127.06 ( $\text{CH}$ ), 127.11 ( $\text{CH}$ ), 128.1 ( $\text{CH}$ ), 128.15 (2CH), 128.22 ( $\text{CH}$ ), 128.7 ( $\text{CH}$ ), 129.0 ( $\text{CH}$ ), 129.2 (C), 131.3 (C), 132.4 (C), 133.5 (C), 143.0 (C), 144.1 (C), 144.7 (C), 148.3 (C), 169.0 (C), 173.5 (C), 194.0 (C); IR (KBr) 1721, 1439, 1271, 1106, 912, 835, 784, 758, 703  $\text{cm}^{-1}$ ; HRMS (ESI): Exact mass calcd for  $\text{C}_{43}\text{H}_{40}\text{N}_3\text{O}_4$   $[\text{M}+\text{H}]^+$  662.3013, found 662.3039. The enantiomeric excess of *endo*-**5d** was determined by chiral-phase HPLC analysis (Daicel Chiralcel OZ-3, Hexane:*i*-PrOH = 90:10, v/v, detector: UV 254 nm, flow rate = 0.5 mL/min, 35 °C):  $t_{\text{major}} = 82.2$  min,  $t_{\text{minor}} = 70.6$  min.

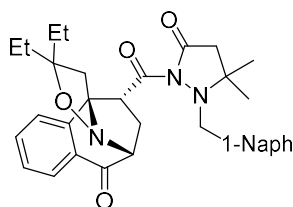

**(3a*S*,9*R*,11*R*)-2,2-Diethyl-11-([5,5-dimethyl-1-(1-naphthylmethyl)-3-oxo-2-pyrazolidinyl]-carbonyl)-8-oxo-3,3a,8,9-tetrahydro-2*H*-3a,9-ethanoisoxazolo[2,3-*a*]isoquinoline (*endo*-**5f**).** Isolated as colorless amorphous (154.5 mg, 56%, *endo:exo* = >99:1) by silica gel column chromatography (30 g,  $\text{CH}_2\text{Cl}_2$ :EtOAc = 98:2 – 97:3, v/v) following the general procedure using diazo isoxazoline **4f** (135.7 mg, 0.50 mmol).  $[\alpha]_{\text{D}}^{22} = +112.9$  ( $c$  1.0,  $\text{CHCl}_3$ , 89% ee);  $R_f = 0.31$  (Hexane:EtOAc = 75:25, v/v);  $^1\text{H}$  NMR (300 MHz,  $\text{C}_6\text{D}_6$ )  $\delta$  0.63 (3H, s), 0.68 (3H, s), 0.91 (3H, t,  $J = 7.4$  Hz), 1.10 (3H, t,  $J = 7.4$  Hz), 1.56 (1H, m), 1.94-2.15 (3H, m), 2.04 (1H, d,  $J = 17.0$  Hz), 2.20 (1H, d,  $J = 17.0$  Hz), 2.30 (1H, dd,  $J = 4.0, 12.7$  Hz), 2.32 (1H, d,  $J = 11.8$  Hz), 2.70 (1H, m), 3.41 (1H, d,  $J = 11.8$  Hz), 3.78 (1H, d,  $J = 14.3$  Hz), 4.01 (1H, d,  $J = 14.3$  Hz), 4.70 (1H, d,  $J = 6.7$  Hz), 5.04 (1H, dd,  $J = 4.0, 10.3$  Hz), 6.70 (1H, m), 6.87-6.98 (2H, m), 7.15 (1H, m), 7.26 (1H, m), 7.37 (1H, m), 7.49 (1H, d,  $J = 8.1$  Hz), 7.59-7.70 (2H, m), 8.09 (1H, dd,  $J = 0.9, 7.7$  Hz), 8.21 (1H, d,  $J = 8.4$  Hz);  $^{13}\text{C}$  NMR (125 MHz,  $\text{CDCl}_3$ )  $\delta$  8.2 ( $\text{CH}_3$ ), 9.1 ( $\text{CH}_3$ ), 25.2 ( $\text{CH}_3$ ), 26.8 ( $\text{CH}_3$ ), 28.4 ( $\text{CH}_2$ ), 30.0 ( $\text{CH}_2$ ), 31.4 ( $\text{CH}_2$ ), 43.8 ( $\text{CH}_2$ ), 45.4 ( $\text{CH}_2$ ), 51.5 ( $\text{CH}$ ), 54.3 ( $\text{CH}_2$ ), 60.4 (C), 74.3 ( $\text{CH}$ ), 80.9 (C), 86.6 (C), 123.2 ( $\text{CH}$ ), 124.5 ( $\text{CH}$ ), 125.4 ( $\text{CH}$ ), 125.6 ( $\text{CH}$ ), 126.1 ( $\text{CH}$ ), 127.1 ( $\text{CH}$ ), 128.0 (2CH), 128.2 ( $\text{CH}$ ), 128.8 ( $\text{CH}$ ), 131.3 (C), 131.4 (C), 132.5 (C), 133.2 ( $\text{CH}$ ), 133.6 (C), 143.6 (C), 169.5 (C), 174.0 (C), 194.5 (C); IR (KBr) 2969, 1742, 1698, 1602,

1458, 1305, 1227, 914, 770, 732  $\text{cm}^{-1}$ ; HRMS (ESI): Exact mass calcd for  $\text{C}_{34}\text{H}_{37}\text{N}_3\text{NaO}_4$   $[\text{M}+\text{Na}]^+$  574.2676, found 574.2671. The enantiomeric excess of *endo*-**5f** was determined by chiral-phase HPLC analysis (Daicel Chiralpak AD-3, Hexane:*i*-PrOH = 90:10, v/v, detector: UV 254 nm, flow rate = 0.5 mL/min, 35 °C):  $t_{\text{major}} = 20.1$  min,  $t_{\text{minor}} = 116.6$  min.

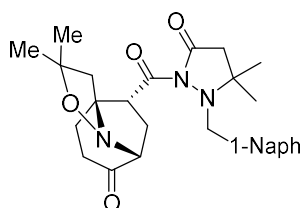

**(3a*S*,7*R*,9*R*)-2,2-Dimethyl-9-([5,5-dimethyl-1-(1-naphthylmethyl)-3-oxo-2-pyrazolidinyl]-carbonyl)-6-oxo-3,3a-dihydro-2*H*-3a,7-ethanoisoxazolo[2,3-*a*]piperidine (*endo*-**5g**).** Isolated as colorless amorphous (144.3 mg, 63%, *endo:exo* = >99:1) by silica gel column chromatography (20 g, Hexane:EtOAc = 85:15, v/v) following the general procedure using diazo isoxazoline **4g** (97.6 mg, 0.50 mmol).  $[\alpha]_{\text{D}}^{26} = +20.6$  ( $c$  1.0,  $\text{CHCl}_3$ , 63% ee);  $R_f = 0.29$  (Hexane:EtOAc = 60:40, v/v);  $^1\text{H}$  NMR ( $\text{C}_6\text{D}_6$ , 500 MHz)  $\delta$  0.68 (3H, s), 0.82 (3H, s), 1.30-1.34 (2H, m), 1.41 (3H, s), 1.58 (1H, d,  $J = 12.0$  Hz), 1.60 (3H, s), 1.93-2.01 (2H, m), 2.08 (1H, d,  $J = 17.3$  Hz), 2.12 (1H, d,  $J = 17.3$  Hz), 2.42 (1H, m), 2.56 (1H, d,  $J = 12.0$  Hz), 2.77 (1H, dt,  $J = 18.1, 9.9$  Hz), 3.99 (1H, d,  $J = 13.9$  Hz), 4.10 (1H, d,  $J = 13.9$  Hz), 4.22 (1H, d,  $J = 7.1$  Hz), 4.86 (1H, m), 7.23 (1H, m), 7.28 (1H, m), 7.42 (1H, m), 7.55 (1H, d,  $J = 8.2$  Hz), 7.63 (1H, d,  $J = 8.0$  Hz), 7.71 (1H, d,  $J = 7.1$  Hz), 8.30 (1H, d,  $J = 8.5$  Hz);  $^{13}\text{C}$  NMR (75 MHz,  $\text{CDCl}_3$ )  $\delta$  25.3 ( $\text{CH}_3$ ), 26.8 ( $\text{CH}_3$ ), 27.1 ( $\text{CH}_3$ ), 28.6 ( $\text{CH}_2$ ), 29.6 ( $\text{CH}_3$ ), 32.5 ( $\text{CH}_2$ ), 33.2 ( $\text{CH}_2$ ), 43.5 ( $\text{CH}_2$ ), 48.7 (CH), 51.2 ( $\text{CH}_2$ ), 55.1 ( $\text{CH}_2$ ), 61.0 (C), 74.2 (CH), 78.0 (C), 81.4 (C), 123.6 (CH), 125.2 (CH), 125.9 (CH), 126.5 (CH), 128.6 (CH), 128.8 (2CH), 131.9 (C), 132.1 (C), 133.7 (C), 171.5 (C), 174.9 (C), 205.8 (C); IR (KBr) 2972, 1743, 1723, 1511, 1455, 1365, 1302, 1225, 803, 755  $\text{cm}^{-1}$ ; HRMS (ESI): Exact mass calcd for  $\text{C}_{28}\text{H}_{33}\text{N}_3\text{NaO}_4$   $[\text{M}+\text{Na}]^+$  498.2363, found 498.2381. The enantiomeric excess of *endo*-**5g** was determined by chiral-phase HPLC analysis (Daicel Chiralpak AD-3, Hexane:*i*-PrOH = 90:10, v/v, detector: UV 254 nm, flow rate = 0.5 mL/min, 35 °C)  $t_{\text{major}} = 25.8$  min,  $t_{\text{minor}} = 31.9$  min.

**General procedure for the hydrogenation of cycloadducts *exo-3* exemplified by the reaction of *exo-3b*.** To a solution of *exo-3b* (48.3 mg, 0.10 mmol) in MeOH (2.0 mL) was added Pd(OH)<sub>2</sub>/C (20%, 10.0 mg, 0.02 mmol). After the flask was purged with hydrogen, the mixture was stirred at 26 °C for 18 h under a hydrogen atmosphere with a balloon of hydrogen (1 atm). The mixture was filtered through a plug of Celite, rinsed with MeOH (50 mL), and then concentrated. Flash column chromatography (SiO<sub>2</sub>: 10 g, EtOAc) yielded alcohol **6** (31.1 mg, 90%). The reactions of *exo-3a* and *exo-3c* by the same procedure also gave alcohol **6**.

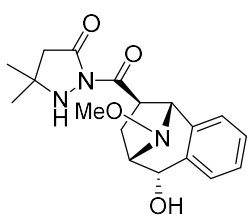

**(1*R*,9*S*,8*S*,11*R*)-8-Hydroxy-11-[(5,5-dimethyl-3-oxo-2-pyrazolidinyl)carbonyl]-12-methoxy-12-azatricyclo[7.2.1.0<sup>2,7</sup>]dodeca-2,4,6-triene (**6**).** Colorless needles; Mp. 152-153 °C; [ $\alpha$ ]<sub>D</sub><sup>25</sup> -6.33 (*c* 0.6, CHCl<sub>3</sub>, 99% ee); *R*<sub>f</sub> = 0.20 (EtOAc); <sup>1</sup>H NMR (300 MHz, CD<sub>3</sub>OD)  $\delta$  1.295 (3H $\times$ 1/10, s), 1.304 (3H $\times$ 1/10, s), 1.33 (3H $\times$ 9/10, s), 1.35 (3H $\times$ 9/10, s), 2.18 (1H $\times$ 9/10, ddd, *J* = 1.1, 9.5, 13.9 Hz), 2.26-2.47 (2H $\times$ 1/10, m), 2.59 (1H $\times$ 1/10, d, *J* = 16.8 Hz), 2.65 (1H $\times$ 1/10, d, *J* = 16.8 Hz), 2.65 (2H $\times$ 9/10, s), 2.78 (1H $\times$ 9/10, ddd, *J* = 3.6, 7.7, 13.9 Hz), 3.39 (1H, dd, *J* = 3.6, 9.5 Hz), 3.47 (3H $\times$ 9/10, s), 3.49 (3H $\times$ 1/10, s), 3.84 (1H $\times$ 1/10, m), 4.08 (1H $\times$ 9/10, m), 4.50 (1H $\times$ 1/10, s), 4.83 (1H $\times$ 9/10, s), 5.07 (1H $\times$ 9/10, d, *J* = 5.4 Hz), 5.23 (1H $\times$ 1/10, d, *J* = 4.9 Hz), 7.18-7.32 (2H, m), 7.39-7.52 (2H, m); <sup>13</sup>C NMR (75 MHz, CD<sub>3</sub>OD)  $\delta$  22.1 (CH<sub>2</sub>), 22.6 (CH<sub>2</sub>), 25.4 (CH<sub>3</sub>), 25.60 (CH<sub>3</sub>), 25.62 (CH<sub>3</sub>), 25.8 (CH<sub>3</sub>), 48.2 (CH<sub>2</sub>), 48.3 (CH<sub>2</sub>), 55.0 (2CH), 56.7 (C), 56.9 (C), 59.3 (CH<sub>3</sub>), 60.5 (CH<sub>3</sub>), 61.7 (CH), 65.8 (CH), 67.1 (CH), 70.9 (CH), 71.8 (CH), 72.4 (CH), 127.2 (2CH), 127.6 (CH), 128.1 (CH), 128.4 (CH), 128.55 (CH), 128.64 (CH), 128.9 (CH), 136.8 (C), 138.1 (C), 138.2 (C), 139.3 (C), 171.8 (C), 172.6 (C), 175.8 (C), 176.2 (C); IR (KBr) 3552, 3338, 3210, 2981, 2966, 1727, 1708, 1467, 1309, 1256, 1037, 941, 755, 682 cm<sup>-1</sup>; HRMS (ESI): Exact mass calcd for C<sub>18</sub>H<sub>23</sub>N<sub>3</sub>NaO<sub>4</sub> [*M*+Na]<sup>+</sup> 368.1581, found 368.1571. The <sup>1</sup>H and <sup>13</sup>C NMR analysis showed that compound **6** exists as a 9:1 mixture of nitrogen invertomers at room temperature. The enantiomeric excess of **6** was determined by chiral-phase HPLC analysis (Daicel Chiralpak AD-H, Hexane:*i*-PrOH = 86:14, v/v, detector: UV 254 nm, flow rate = 0.5 mL/min, 35 °C):



$t_{\text{major}} = 49.1 \text{ min}$ ,  $t_{\text{minor}} = 56.1 \text{ min}$ .

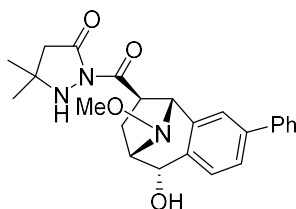

**(1R,9S,8S,11R)-8-Hydroxy-11-[(5,5-dimethyl-3-oxo-2-pyrazolidinyl)carbonyl]-12-methoxy-4-phenyl-12-azatricyclo[7.2.1.0<sup>2,7</sup>]dodeca-2,4,6-triene.** Isolated as colorless needles (33.4 mg, 79%) by silica gel column chromatography (10 g, EtOAc:Hexane = 90:10, v/v) following the general procedure (reaction time: 10 h) using *exo*-**3f** (56.0 mg, 0.10 mmol). Mp. 120-122 °C;  $[\alpha]_{\text{D}}^{25} -55.3$  ( $c$  0.4, CHCl<sub>3</sub>, 95% ee);  $R_f = 0.10$  (EtOAc:Hexane = 90:10, v/v); <sup>1</sup>H NMR (300 MHz, CD<sub>3</sub>OD)  $\delta$  1.29 (3H×1/13, s), 1.30 (3H×1/13, s), 1.32 (3H×12/13, s), 1.35 (3H×12/13, s), 2.20 (1H×12/13, ddd,  $J = 0.8, 9.4, 13.7$  Hz), 2.38 (1H×1/13, m), 2.46 (1H×1/13, m), 2.60 (1H×1/13, d,  $J = 16.6$  Hz), 2.66 (2H×12/13, s), 2.67 (1H×1/13, d,  $J = 16.6$  Hz), 2.83 (1H×12/13, ddd,  $J = 3.5, 7.7, 13.7$  Hz), 3.45 (1H×1/13, dd,  $J = 3.5, 9.4$  Hz), 3.48 (3H×12/13, s), 3.51 (1H×1/13, m), 3.54 (1H×1/13, s), 3.88 (1H×1/13, m), 4.11 (1H×12/13, m), 4.56 (1H×1/13, s), 4.89 (1H×12/13, s), 5.11 (1H×12/13, d,  $J = 5.4$  Hz), 5.27 (1H×1/13, d,  $J = 4.8$  Hz), 7.32 (1H, m), 7.38-7.46 (2H, m), 7.49-7.57 (2H, m), 7.58-7.67 (2H, m), 7.74 (1H, brs); <sup>13</sup>C NMR (75 MHz, CD<sub>3</sub>OD)  $\delta$  22.0 (CH<sub>2</sub>), 22.3 (CH<sub>2</sub>), 25.5 (CH<sub>3</sub>), 25.6 (CH<sub>3</sub>), 25.7 (CH<sub>3</sub>), 25.8 (CH<sub>3</sub>), 48.2 (CH<sub>2</sub>), 48.3 (CH<sub>2</sub>), 53.2 (CH), 55.1 (CH), 56.9 (C), 57.9 (C), 59.4 (CH<sub>3</sub>), 60.6 (CH<sub>3</sub>), 61.7 (CH), 66.2 (CH), 66.9 (CH), 71.0 (CH), 71.6 (CH), 72.7 (CH), 124.6 (CH), 125.7 (CH), 126.3 (CH), 126.9 (CH), 127.4 (CH), 127.5 (CH), 127.9 (CH), 128.3 (CH), 128.4 (CH), 128.6 (CH), 129.1 (CH), 129.9 (CH), 135.8 (C), 137.3 (C), 138.7 (C), 139.8 (C), 141.5 (C), 141.6 (C), 142.0 (C), 142.2 (C), 171.7 (C), 172.5 (C), 175.8 (C), 176.1 (C); IR (KBr) 3430, 2961, 2924, 2851, 1765, 1744, 1686, 1307, 1253, 1039, 867, 761, 700 cm<sup>-1</sup>; HRMS (ESI): Exact mass calcd for C<sub>24</sub>H<sub>27</sub>N<sub>3</sub>NaO<sub>4</sub> [M+Na]<sup>+</sup> 444.1894, found 444.1877. The <sup>1</sup>H and <sup>13</sup>C NMR analysis showed that this compound exists as a 9:1 mixture of nitrogen invertomers at room temperature. The enantiomeric excess of this compound was determined by chiral-phase HPLC analysis (Daicel Chiralpak AD-H, Hexane:*i*-PrOH = 75:25, v/v, detector: UV 254 nm, flow rate = 0.5 mL/min, 35 °C):  $t_{\text{major}} = 28.3 \text{ min}$ ,  $t_{\text{minor}} = 57.6 \text{ min}$ .

**Conversion of alcohol 6 to *p*-bromobenzoate 7.** To a solution of **6** (34.6 mg, 0.10 mmol) in CH<sub>2</sub>Cl<sub>2</sub> (1.0 mL) were added 4-bromobenzoic acid (24.2 mg, 0.12 mmol), DCC (32.8 mg, 0.16 mmol), and DMAP (18.4 mg, 0.15 mmol) successively, and then the mixture was stirred at 26 °C for 24 h. The mixture was filtered through a plug of Celite, rinsed with Et<sub>2</sub>O (30 mL), and then concentrated. Flash column chromatography (SiO<sub>2</sub>: 10 g, Hexane:EtOAc = 50:50, v/v) yielded **7** (45.1 mg, 84%).

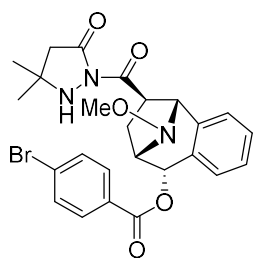

**(1*R*,9*S*,8*S*,11*R*)-8-*p*-Bromobenzoyloxy-11-[(5,5-dimethyl-3-oxo-2-pyrazolidinyl)carbonyl]-12-methoxy-12-azatricyclo[7.2.1.0<sup>2,7</sup>]dodeca-2,4,6-triene (**7**).** Colorless needles; Mp. 93-95 °C; [ $\alpha$ ]<sub>D</sub><sup>25</sup> +31.2 (*c* 0.5, CHCl<sub>3</sub>); *R*<sub>f</sub> = 0.20 (EtOAc:Hexane = 80:20, v/v); <sup>1</sup>H NMR (300 MHz, C<sub>6</sub>D<sub>6</sub>)  $\delta$  0.70 (3H $\times$ 1/6, s), 0.72 (3H $\times$ 5/6+3H $\times$ 1/6, m), 0.82 (3H $\times$ 5/6, s), 1.88 (1H $\times$ 1/6, d, *J* = 16.6 Hz), 1.90 (1H $\times$ 5/6, d, *J* = 16.6 Hz), 1.95 (1H $\times$ 1/6, d, *J* = 16.6 Hz), 2.00 (1H $\times$ 5/6, d, *J* = 16.6 Hz), 2.32 (1H $\times$ 5/6, ddd, *J* = 1.0, 9.5, 13.8 Hz), 2.55 (1H $\times$ 1/6, ddd, *J* = 1.0, 9.9, 13.9 Hz), 2.67 (1H $\times$ 1/6, ddd, *J* = 3.6, 7.4, 13.9 Hz), 3.28 (1H $\times$ 5/6, ddd, *J* = 3.3, 7.7, 13.8 Hz), 3.38 (3H $\times$ 5/6, s), 3.43 (3H $\times$ 1/6, s), 3.78 (1H $\times$ 4/5, dd, *J* = 3.3, 9.5 Hz), 3.79 (1H $\times$ 1/6, m), 4.38 (1H $\times$ 1/6, m), 4.52 (1H $\times$ 1/6, s), 4.63 (1H $\times$ 5/6, m), 4.65 (1H $\times$ 5/6, s), 4.92 (1H $\times$ 1/6, s), 5.12 (1H $\times$ 5/6, s), 6.75 (1H $\times$ 5/6, d, *J* = 5.5 Hz), 7.03 (1H, m), 7.07-7.29 (4H+1H $\times$ 1/6, m), 7.50 (1H $\times$ 1/6, m), 7.74-7.81 (2H, m), 7.86 (1H $\times$ 5/6, m); <sup>13</sup>C NMR (75 MHz, C<sub>6</sub>D<sub>6</sub>)  $\delta$  22.9 (2CH<sub>2</sub>), 25.4 (CH<sub>3</sub>), 25.67 (CH<sub>3</sub>), 25.69 (CH<sub>3</sub>), 26.0 (CH<sub>3</sub>), 47.2 (CH<sub>2</sub>), 47.4 (CH<sub>2</sub>), 49.3 (CH), 54.5 (CH), 54.8 (C), 54.9 (C), 57.9 (CH), 59.5 (CH<sub>3</sub>), 60.5 (CH<sub>3</sub>), 65.4 (CH), 67.0 (CH), 71.5 (CH), 71.9 (CH), 74.2 (CH), 127.3 (CH), 127.7 (CH), 127.8 (CH), 128.0 (CH), 128.2 (CH), 128.4 (CH), 128.5 (CH), 128.6 (CH), 129.4 (C), 129.6 (C), 131.6 (2CH), 132.0 (CH), 132.1 (CH), 132.2 (C), 133.4 (C), 138.2 (C), 139.7 (C), 165.4 (C), 165.8 (C), 168.3 (C), 169.3 (C), 171.5 (C), 171.8 (C), two quaternary carbons of the product are overlapped in C<sub>6</sub>D<sub>6</sub> signals; IR (KBr) 2963, 1720, 1589, 1308, 1260, 1101, 1011, 848, 755, 683 cm<sup>-1</sup>; HRMS (ESI): Exact mass calcd for C<sub>25</sub>H<sub>26</sub>BrN<sub>3</sub>O<sub>5</sub> [M+Na]<sup>+</sup> 550.0948, found 550.0948.

**Hydrogenation of *endo*-5f.** To a solution of *endo*-5f (55.2 mg, 0.10 mmol) in MeOH (0.5 mL) was added Pd(OH)<sub>2</sub>/C (20%, 10.1 mg, 0.02 mmol). After the flask was purged with hydrogen, the mixture was stirred at 26 °C for 12 h with a balloon of hydrogen (1 atm). The mixture was filtered through a plug of Celite, rinsed with MeOH (50 mL), and then concentrated. Flash column chromatography (SiO<sub>2</sub>: 12 g, CHCl<sub>3</sub>:MeOH = 98:2, v/v) yielded the corresponding alcohol (33.0 mg, 79%).

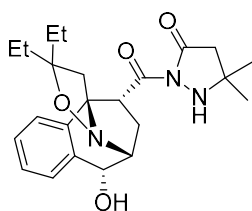

**(3a*S*,8*R*,9*R*,11*R*)-2,2-Diethyl-8-hydroxy-11-[(5,5-dimethyl-3-oxo-2-pyrazolidinyl)carbonyl]-3,3a,8,9-tetrahydro-2*H*-3a,9-ethanoisoxazolo[2,3-*a*]isoquinoline.** Colorless amorphous;  $[\alpha]_{\text{D}}^{26} +120.5$  (*c* 0.2, CHCl<sub>3</sub>);  $R_f = 0.30$  (Hexane:EtOAc = 67:33, v/v); <sup>1</sup>H NMR (300 MHz, C<sub>6</sub>D<sub>6</sub>)  $\delta$  0.59 (3H, s), 0.68 (3H, s), 0.94 (3H, t, *J* = 7.4 Hz), 1.11 (3H, t, *J* = 7.6 Hz), 1.60 (1H, dq, *J* = 7.4, 14.7 Hz), 1.89 (1H, d, *J* = 16.7 Hz), 1.95 (1H, d, *J* = 16.7 Hz), 1.97-2.09 (3H, m), 2.28 (1H, d, *J* = 12.0 Hz), 2.63 (1H, ddd, *J* = 6.5, 10.6, 13.3 Hz), 2.92 (1H, dd, *J* = 3.0, 13.3 Hz), 3.45 (1H, d, *J* = 12.0 Hz), 3.83 (1H, brs), 4.25 (1H, brs), 4.41 (1H, t, *J* = 6.5 Hz), 4.77 (1H, dd, *J* = 3.0, 10.6 Hz), 5.41 (1H, m), 6.74 (1H, dd, *J* = 1.1, 7.6 Hz), 6.95 (1H, m), 7.06 (1H, dt, *J* = 1.1, 7.6 Hz), 7.59 (1H, d, *J* = 7.6 Hz); <sup>13</sup>C NMR (75 MHz, CD<sub>3</sub>OD)  $\delta$  8.7 (CH<sub>3</sub>), 9.3 (CH<sub>3</sub>), 25.4 (CH<sub>3</sub>), 25.4 (CH<sub>3</sub>), 26.1 (CH<sub>3</sub>), 28.2 (CH<sub>2</sub>), 29.0 (CH<sub>2</sub>), 31.1 (CH<sub>2</sub>), 46.2 (CH<sub>2</sub>), 47.5 (CH<sub>2</sub>), 53.8 (CH), 53.9 (C), 69.5 (CH), 71.8 (CH), 81.0 (C), 86.2 (C), 123.1 (CH), 127.1 (CH), 128.2 (CH), 128.7 (CH), 139.0 (C), 139.1 (C), 170.7 (C), 170.8 (C); IR (KBr) 3443, 2972, 2361, 1731, 1454, 1200, 1159, 1081, 761, 702 cm<sup>-1</sup>; HRMS (ESI): Exact mass calcd for C<sub>23</sub>H<sub>30</sub>N<sub>3</sub>O<sub>4</sub> [M-H]<sup>-</sup> 412.2242, found 412.2226.

## Preparation of diazo compounds 1b – 1e

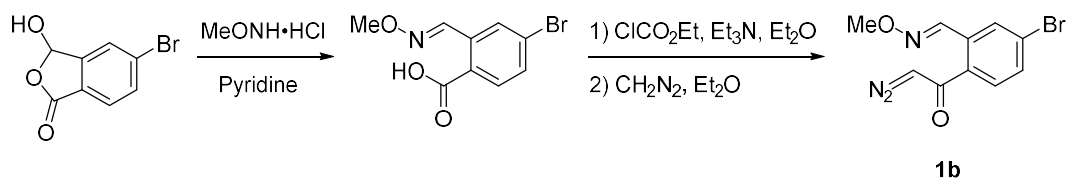

**4-Bromo-2-methoxyiminomethylbenzoic acid.** To a solution of 5-bromo-3-hydroxyphthalide<sup>4</sup> (1.49 g, 6.50 mmol) in pyridine (20 mL) was added MeONH<sub>2</sub>·HCl (1.03 g, 12.4 mmol). The mixture was stirred at room temperature for 18 h, and then concentrated. After adding 1 M H<sub>3</sub>PO<sub>4</sub> aq (30 mL), the mixture was extracted with EtOAc (40 mL×3). The combined EtOAc extracts were dried over Na<sub>2</sub>SO<sub>4</sub>. After evaporation of the solvent under reduced pressure, the residue was recrystallized from CH<sub>2</sub>Cl<sub>2</sub> (50 mL) to give 4-bromo-2-methoxyiminomethylbenzoic acid (1.12 g, 67%) as colorless needles. Mp. 191-193 °C; *R<sub>f</sub>* = 0.20 (Hexane:EtOAc = 50:50, v/v); <sup>1</sup>H NMR (300 MHz, DMSO-*d*<sub>6</sub>) δ 3.93 (3H, s), 7.74 (1H, dd, *J* = 2.1, 8.4 Hz), 7.86 (1H, d, *J* = 8.4 Hz), 7.93 (1H, d, *J* = 2.1 Hz), 8.78 (1H, s); <sup>13</sup>C NMR (75 MHz, DMSO-*d*<sub>6</sub>) δ 62.0 (CH<sub>3</sub>), 125.9 (C), 129.1 (CH), 129.2 (C), 132.5 (CH), 132.7 (CH), 134.3 (C), 147.0 (CH), 167.0 (C); IR (KBr) 2936, 1689, 1551, 1304, 1272, 1051, 934, 802 cm<sup>-1</sup>; HRMS (ESI): Exact mass calcd for C<sub>9</sub>H<sub>7</sub>BrNO<sub>3</sub> [M-H]<sup>-</sup> 255.9615, found 255.9601.

**2-Diazoacetyl-5-bromobenzaldehyde O-methyloxime (1b).** To a solution of 4-bromo-2-methoxyiminomethylbenzoic acid (1.00 g, 3.80 mmol) in Et<sub>2</sub>O (30 mL) were added methyl chloroformate (0.30 mL, 4.20 mmol) and Et<sub>3</sub>N (0.60 mL, 4.20 mmol) successively. The mixture was stirred for 2 h at room temperature, and then filtered to remove Et<sub>3</sub>N·HCl. The filtrate was diluted with Et<sub>2</sub>O (15 mL), and then the diluted filtrate was added at 0 °C over a period of 30 min to a solution of CH<sub>2</sub>N<sub>2</sub> in Et<sub>2</sub>O. The mixture was stirred at room temperature for 1 day, and then concentrated. Silica gel column chromatography (60 g, Hexane:EtOAc = 95:5, v/v) yielded **1b** (393.1 mg, 36%) as yellow prisms. Mp. 163-164 °C; *R<sub>f</sub>* = 0.23 (Hexane:EtOAc = 80:20, v/v); <sup>1</sup>H NMR (300 MHz, CDCl<sub>3</sub>) δ 3.99 (3H, s), 5.62 (1H, s), 7.32 (1H, d, *J* = 8.3 Hz), 7.53 (1H, dd, *J* = 2.0, 8.3 Hz), 8.10 (1H, d, *J* = 2.0 Hz), 8.51 (1H, s); <sup>13</sup>C NMR (75 MHz, CDCl<sub>3</sub>) δ 57.2 (CH), 62.3 (CH<sub>3</sub>), 125.9 (C), 128.8 (CH), 130.1 (CH), 132.2 (CH), 132.6 (C), 135.6 (C), 145.6 (CH), 187.1 (C); IR (KBr) 3087, 2933, 2117, 1606, 1546, 1374,

1088, 1053, 940, 890, 759, 578  $\text{cm}^{-1}$ ; HRMS (ESI): Exact mass calcd for  $\text{C}_{10}\text{H}_8\text{BrN}_3\text{NaO}_2$   $[\text{M}+\text{Na}]^+$  303.9692, found 303.9688.

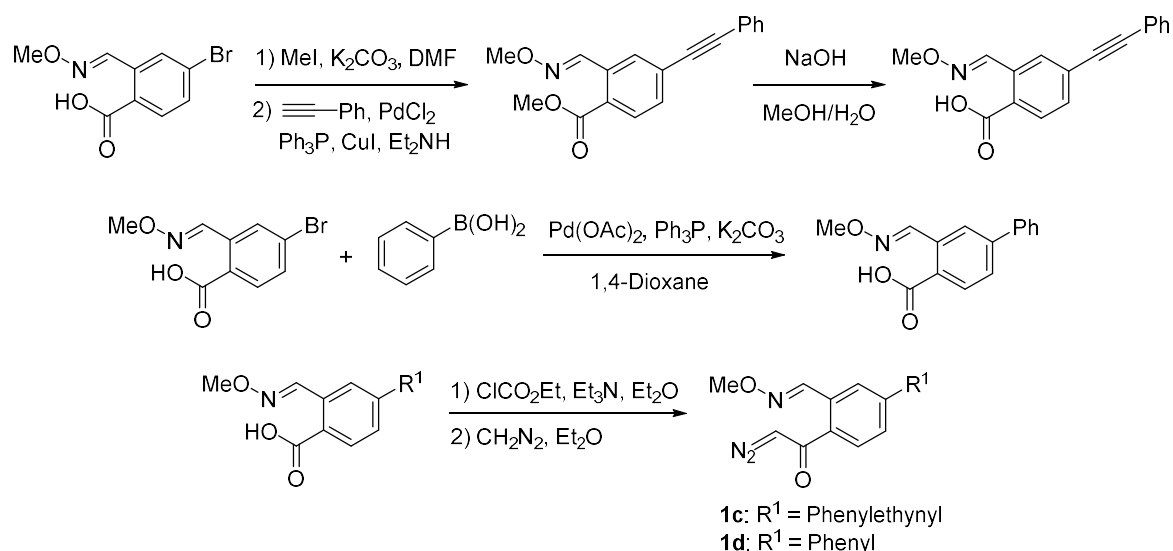

**Methyl 2-methoxyiminomethyl-4-phenylethynylbenzoate.** To a solution of 4-bromo-2-methoxyiminomethylbenzoic acid (2.14 g, 8.30 mmol) in DMF (29 mL) were added  $\text{K}_2\text{CO}_3$  (2.29 g, 16.6 mmol) and  $\text{CH}_3\text{I}$  (1.54 mL, 24.9 mmol) at 0 °C, and then the mixture was stirred at 40 °C for 1 h. After cooling the mixture to room temperature, EtOAc (50 mL) was added, and the resulting solution was washed with water (50 mL $\times$ 3) and brine (50 mL $\times$ 3). The organic layer was dried over  $\text{Na}_2\text{SO}_4$ , and then concentrated. The crude ester (2.54 g) was used for Sonogashira coupling without purification. To a solution of the crude ester in  $\text{Et}_2\text{NH}$  (25 mL) were added  $\text{PdCl}_2$  (148.3 mg, 0.83 mmol),  $\text{Ph}_3\text{P}$  (439.0 mg, 1.70 mmol), CuI (318.7 mg, 1.70 mmol), and phenylacetylene (1.36 mL, 12.5 mmol), and then the mixture was refluxed for 8 h. After cooling the mixture to room temperature,  $\text{Et}_2\text{NH}$  was removed under reduced pressure. Water (50 mL) was added to the residue, and the organic phase was extracted with EtOAc (50 mL $\times$ 3). The organic extracts were dried over  $\text{Na}_2\text{SO}_4$  and concentrated. Silica gel column chromatography (60 g, Hexane:EtOAc = 90:10, v/v) yielded methyl 2-methoxyiminomethyl-4-phenylethynylbenzoate (2.26 g, 90%) as colorless prisms. Mp. 86-88 °C;  $R_f = 0.16$  (Hexane:EtOAc = 90:10, v/v);  $^1\text{H NMR}$  (300 MHz,  $\text{CDCl}_3$ )  $\delta$  3.92 (3H, s), 4.02 (3H, s), 7.33-7.41 (3H, m), 7.51-7.60 (3H, m), 7.95 (1H, dd,  $J = 0.4, 8.1$  Hz), 8.07 (1H, d,  $J = 1.7$  Hz), 8.86 (1H, s);  $^{13}\text{C NMR}$  (75 MHz,  $\text{CDCl}_3$ )  $\delta$

52.4 (CH<sub>3</sub>), 62.2 (CH<sub>3</sub>), 88.1 (C), 92.5 (C), 122.6 (C), 127.6 (C), 128.1 (C), 128.4 (CH), 128.8 (CH), 130.4 (CH), 130.8 (CH), 131.8 (CH), 131.9 (CH), 133.3 (C), 147.5 (CH), 166.5 (C); IR (KBr) 2936, 2215, 1719, 1610, 1550, 1436, 1293, 1254, 1053, 916, 781, 763, 529 cm<sup>-1</sup>; HRMS (ESI): Exact mass calcd for C<sub>18</sub>H<sub>15</sub>NNaO<sub>3</sub> [M+Na]<sup>+</sup> 316.0941, found 316.0950.

**2-Diazoacetyl-5-phenylethynylbenzaldehyde *O*-methyloxime (1c).** To a solution of 2-methoxyiminomethyl-4-phenylethynylbenzoate (2.26 g, 7.60 mmol) in MeOH (114 mL) and water (29 mL) was added NaOH (1.17 g, 29.3 mmol), and the mixture was refluxed for 2 h. After cooling the mixture to room temperature, the mixture was acidified (pH 1) with 1 M HCl aq, and then extracted with CH<sub>2</sub>Cl<sub>2</sub> (50 mL×3). The organic extracts were dried over Na<sub>2</sub>SO<sub>4</sub> and concentrated. The resulting crude carboxylic acid was used without purification for the synthesis of **1c**. To a solution of crude carboxylic acid in Et<sub>2</sub>O (40 mL) were added methyl chloroformate (0.49 mL, 7.00 mmol) and Et<sub>3</sub>N (1.00 mL, 7.00 mmol) successively. The mixture was stirred for 2 h at room temperature, and then filtered to remove Et<sub>3</sub>N•HCl. The filtrate was diluted with Et<sub>2</sub>O (15 mL), and then the diluted filtrate was added at 0 °C over a period of 30 min to a solution of CH<sub>2</sub>N<sub>2</sub> in Et<sub>2</sub>O. The mixture was stirred at room temperature for 1 day, and then concentrated. Silica gel column chromatography (60 g, Hexane:EtOAc = 95:5, v/v) yielded **1c** (382.5 mg, 33%) as yellow prisms. Mp. 109-111 °C; R<sub>f</sub> = 0.10 (Hexane:EtOAc = 95:5, v/v); <sup>1</sup>H NMR (300 MHz, CDCl<sub>3</sub>) δ 4.00 (3H, s), 5.66 (1H, s), 7.31-7.40 (3H, m), 7.43 (1H, d, *J* = 7.9 Hz), 7.48-7.58 (3H, m), 8.08 (1H, d, *J* = 1.6 Hz), 8.56 (1H, s); <sup>13</sup>C NMR (75 MHz, CDCl<sub>3</sub>) δ 7.1 (CH), 62.2 (CH<sub>3</sub>), 88.1 (C), 92.2 (C), 122.5 (C), 126.6 (C), 127.5 (CH), 128.4 (CH), 128.8 (CH), 130.2 (CH), 131.0 (C), 131.7 (CH), 131.9 (CH), 136.0 (C), 146.4 (CH), 187.3 (C); IR (KBr) 3423, 3086, 2125, 1602, 1377, 1226, 1053, 913, 753, 687 cm<sup>-1</sup>; HRMS (ESI): Exact mass calcd for C<sub>18</sub>H<sub>13</sub>N<sub>3</sub>NaO<sub>2</sub> [M+Na]<sup>+</sup> 326.0900, found 326.0905.

**2-Methoxyiminomethyl-4-phenylbenzoic acid.** To a solution of K<sub>2</sub>CO<sub>3</sub> (1.59 g, 11.5 mmol) in 1,4-dioxane (30 mL) were added 4-bromo-2-methoxyiminomethylbenzoic acid (2.06 g, 8.0 mmol), Pd(OAc)<sub>2</sub> (68.3 mg, 0.30 mmol), Ph<sub>3</sub>P (419.6 mg, 1.60 mmol), and phenylboronic acid (1.46 g, 12.0 mmol), and then the mixture was refluxed for 20 h. After cooling the mixture to room temperature, saturated NH<sub>4</sub>Cl aq (30 mL) was added, and then the mixture was washed with hexane (30 mL). The water layer was acidified (pH 1) with 1 M HCl aq and extracted with CH<sub>2</sub>Cl<sub>2</sub> (50 mL×3). The organic

extracts were dried over Na<sub>2</sub>SO<sub>4</sub> and concentrated. Silica gel column chromatography (55 g, Hexane:EtOAc = 90:10, v/v) yielded 2-methoxyiminomethyl-4-phenylbenzoic acid (1.46 g, 72%) as colorless needles. Mp. 172-173 °C; R<sub>f</sub> = 0.15 (Hexane:EtOAc = 90:10, v/v); <sup>1</sup>H NMR (300 MHz, CDCl<sub>3</sub>) δ 4.04 (3H, s), 7.38-7.53 (3H, m), 7.64-7.73 (3H, m), 8.16-8.23 (2H, m), 9.04 (1H, s); <sup>13</sup>C NMR (75 MHz, CDCl<sub>3</sub>) δ 62.2 (CH<sub>3</sub>), 126.1 (C), 126.4 (CH), 127.4 (CH), 127.9 (CH), 128.5 (CH), 129.0 (CH), 132.4 (CH), 134.5 (C), 139.3 (C), 146.1 (C), 148.3 (CH), 171.8 (C); IR (KBr) 2940, 1688, 1426, 1306, 1061, 748, 689 cm<sup>-1</sup>; HRMS (ESI): Exact mass calcd for C<sub>15</sub>H<sub>13</sub>NNaO<sub>3</sub> [M+Na]<sup>+</sup> 278.0788, found 278.0799.

**2-Diazoacetyl-5-phenylbenzaldehyde *O*-methyloxime (1d).** To a solution of 2-methoxyiminomethyl-4-phenylbenzoic acid (1.27 g) in Et<sub>2</sub>O (30 mL) were added methyl chloroformate (0.36 mL, 5.00 mmol) and Et<sub>3</sub>N (0.77 mL, 5.50 mmol) successively. The mixture was stirred for 2 h at room temperature, and then filtered to remove Et<sub>3</sub>N•HCl. The filtrate was diluted with Et<sub>2</sub>O (15 mL), and then the diluted filtrate was added at 0 °C over a period of 30 min to a solution of CH<sub>2</sub>N<sub>2</sub> in Et<sub>2</sub>O. The mixture was stirred at room temperature for 1 day, and then concentrated. Silica gel column chromatography (60 g, Hexane:EtOAc = 95:5, v/v) yielded **1d** (684.1 mg, 49%) as colorless prisms. Mp. 119-120 °C; R<sub>f</sub> = 0.17 (Hexane:EtOAc = 90:10, v/v); <sup>1</sup>H NMR (300 MHz, CDCl<sub>3</sub>) δ 3.98 (3H, s), 5.70 (1H, s), 7.31-7.53 (4H, m), 7.55-7.67 (3H, m), 8.15 (1H, d, *J* = 1.9 Hz), 8.64 (1H, s); <sup>13</sup>C NMR (75 MHz, CDCl<sub>3</sub>) δ 56.9 (CH), 62.1 (CH<sub>3</sub>), 125.8 (CH), 127.2 (CH), 127.8 (CH), 128.0 (CH), 128.2 (CH), 128.9 (CH), 131.2 (C), 135.5 (C), 139.3 (C), 144.1 (C), 147.1 (CH), 187.7 (C); IR (KBr) 3085, 2932, 2118, 1605, 1372, 1228, 1063, 936, 903, 749, 693, 578 cm<sup>-1</sup>; HRMS (ESI): Exact mass calcd for C<sub>16</sub>H<sub>13</sub>N<sub>3</sub>NaO<sub>2</sub> [M+Na]<sup>+</sup> 302.0900, found 302.0894.

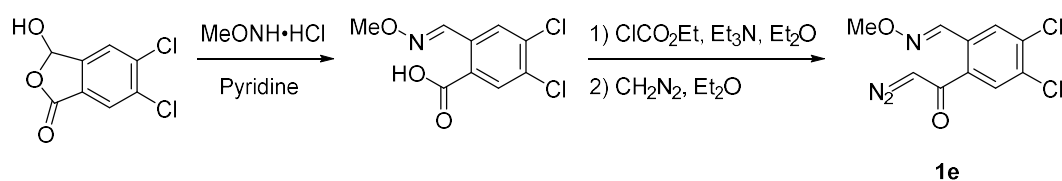

**4,5-Dichloro-2-methoxyiminomethylbenzoic acid.** Isolated as colorless powder (2.24 g, 87%) following the preparation of 4-bromo-2-methoxyiminomethylbenzoic acid (5,6-dichloro-3-hydroxyphthalide<sup>5</sup>: 2.24 g, 10.2 mmol; MeONH<sub>2</sub>•HCl: 1.03 g, 12.4 mmol; pyridine: 30 mL). Mp. 173-

175 °C;  $R_f$  = 0.20 (Hexane:EtOAc = 50:50);  $^1\text{H}$  NMR (300 MHz,  $\text{CDCl}_3$ )  $\delta$  4.02 (3H, s), 8.09 (1H, s), 8.18 (1H, s), 8.87 (1H, s);  $^{13}\text{C}$  NMR (75 MHz,  $\text{CDCl}_3$ )  $\delta$  62.5 ( $\text{CH}_3$ ), 126.7 (C), 129.3 (CH), 133.3 (CH), 133.6 (C), 133.7 (C), 138.2 (C), 146.0 (CH), 169.5 (C); IR (KBr) 3432, 2954, 1727, 1539, 1266, 1233, 1204, 1099, 1053, 923, 717, 574  $\text{cm}^{-1}$ ; HRMS (ESI): Exact mass calcd for  $\text{C}_9\text{H}_6\text{Cl}_2\text{NO}_3$  [M-H] $^-$  245.9730, found 245.9725.

**2-Diazoacetyl-4,5-dichlorobenzaldehyde *O*-methyloxime (1e).** To a solution of 4,5-dichloro-2-methoxyiminomethylbenzoic acid (3.28 g, 13.3 mmol) in  $\text{Et}_2\text{O}$  (100 mL) were added methyl chloroformate (1.05 mL, 14.7 mmol) and  $\text{Et}_3\text{N}$  (2.10 mL, 14.7 mmol) successively. The mixture was stirred for 2 h at room temperature, and then filtered to remove  $\text{Et}_3\text{N}\cdot\text{HCl}$ . The filtrate was diluted with  $\text{Et}_2\text{O}$  (50 mL), and then the diluted filtrate was added at 0 °C over a period of 30 min to a solution of  $\text{CH}_2\text{N}_2$  in  $\text{Et}_2\text{O}$ . The mixture was stirred at room temperature for 1 day, and then concentrated. Silica gel column chromatography (60 g, Hexane:EtOAc = 95:5, v/v) yielded **1e** (359.2 mg, 10%) as yellow powder. Mp. 155-157 °C;  $R_f$  = 0.15 (Hexane:EtOAc = 90:10);  $^1\text{H}$  NMR (300 MHz,  $\text{CDCl}_3$ )  $\delta$  3.99 (3H, s), 5.64 (1H, s) 7.54 (1H, s), 8.05 (1H, s), 8.46 (1H, s);  $^{13}\text{C}$  NMR (75 MHz,  $\text{CDCl}_3$ )  $\delta$  57.5 (CH), 62.4 ( $\text{CH}_3$ ), 128.8 (CH), 129.2 (CH), 130.5 (C), 133.4 (C), 135.8 (C), 136.0 (C), 144.9 (CH), 185.6 (C); IR (KBr) 3112, 2967, 2934, 2818, 2158, 2120, 1593, 1531, 1472, 1379, 1359, 1329, 1228, 1182, 1127, 1059, 938, 923  $\text{cm}^{-1}$ ; The corresponding molecular ion peak was not observed because of instability of **1d**.



## Preparation of diazo compounds 4a and 4c – 4f

Methyl 2-[(chlorohydroxyimino)methyl]benzoate, and its 4-Me and 4-Br derivatives were prepared from the corresponding methyl 2-formylbenzoates<sup>4</sup> by two step sequences according to the literature.<sup>1,6</sup> These methyl 2-[(chlorohydroxyimino)methyl]benzoates were used without purification after extraction by Et<sub>2</sub>O due to their instability.

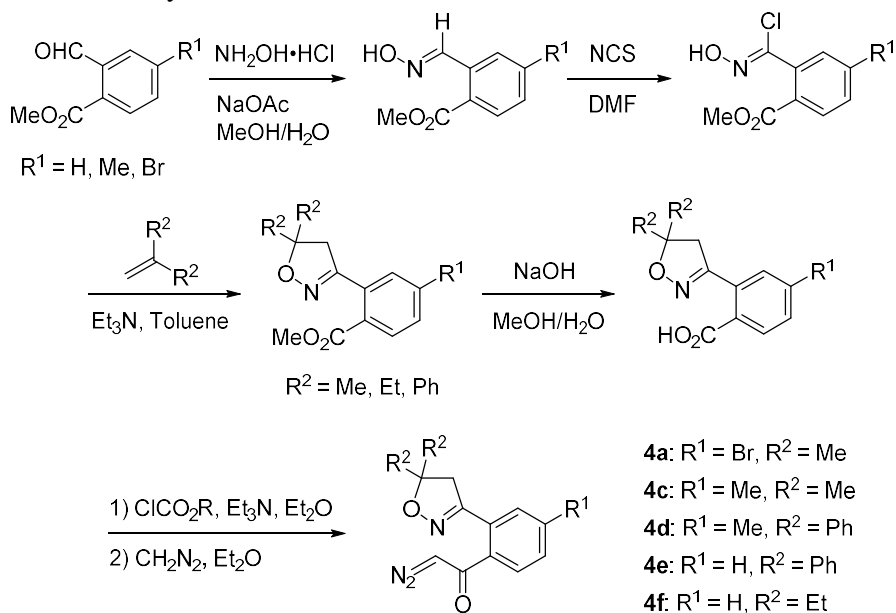

**General procedure for the preparation of 3-(2-methoxycarbonyl)phenylisoxazolines, exemplified by the reaction of methyl 2-[(chlorohydroxyimino)methyl]-4-methylbenzoate with 2-methylpropene.** To a solution of methyl 2-[(chlorohydroxyimino)methyl]-4-methylbenzoate (1.82 g, 8.00 mmol) and 2-methylpropene (10% *i*-Pr<sub>2</sub>O solution, 25.3 mL, 320 mmol) in toluene (32 mL) was added Et<sub>3</sub>N (1.67 mL, 12.0 mmol), and then the mixture was refluxed for 14.5 h. The solvent was removed in vacuo, and the residue was purified by silica gel column chromatography (50 g, Hexane:EtOAc = 92:8, v/v) to provide 3-(2-methoxycarbonyl-5-methyl)phenyl-5,5-dimethylisoxazoline (1.57 g, 79%) as colorless oil.

**3-(2-Methoxycarbonyl-5-methyl)phenyl-5,5-dimethylisoxazoline.** R<sub>f</sub> = 0.40 (Hexane:EtOAc = 86:14, v/v); <sup>1</sup>H NMR (300 MHz, CDCl<sub>3</sub>) δ 1.53 (6H, s), 2.40 (3H, s), 3.06 (2H, s), 3.88 (3H, s), 7.24-7.28 (2H, m), 7.82 (1H, d, *J* = 8.4 Hz); <sup>13</sup>C NMR (75 MHz, CDCl<sub>3</sub>) δ 21.1 (CH<sub>3</sub>), 27.1 (CH<sub>3</sub>), 49.8 (CH<sub>2</sub>), 52.0 (CH<sub>3</sub>), 84.9 (C), 127.1 (C), 129.7 (CH), 130.2 (CH), 130.3 (CH), 131.6 (C), 142.5 (C), 157.9 (C), 166.9 (C); IR (CHCl<sub>3</sub>) 3019, 1719, 1216, 755, 669, 495, 468, 455 cm<sup>-1</sup>; HRMS (ESI): Exact S25

mass calcd for  $C_{14}H_{18}NO_3$   $[M+H]^+$  248.1281, found 248.1276.

**3-(5-Bromo-2-methoxycarbonyl)phenyl-5,5-dimethylisoxazoline.** Isolated as pale yellow prisms (568.4 mg, 49%) by silica gel column chromatography (30 g, Hexane:EtOAc = 95:5, v/v) following the general procedure (methyl 4-bromo-2-[(chlorohydroxyimino)methyl]benzoate: 1.08 g, 3.70 mmol; 2-methylpropene (10% *i*-Pr<sub>2</sub>O solution): 11.7 mL, 148 mmol; Et<sub>3</sub>N: 0.78 mL, 5.60 mmol; toluene: 15 mL; reflux: 10 h). Mp. 63-65 °C;  $R_f$  = 0.28 (Hexane:EtOAc = 86:14, v/v); <sup>1</sup>H NMR (300 MHz, CDCl<sub>3</sub>) δ 1.53 (6H, s), 3.05 (2H, s), 3.89 (3H, s), 7.58-7.62 (2H, m), 7.76 (1H, m); <sup>13</sup>C NMR (75 MHz, CDCl<sub>3</sub>) δ 27.3 (CH<sub>3</sub>), 49.5 (CH<sub>2</sub>), 52.6 (CH<sub>3</sub>), 85.8 (C), 126.5 (C), 129.1 (C), 131.7 (CH), 132.4 (CH), 132.7 (CH), 133.4 (C), 156.5 (C), 166.6 (C); IR (KBr) 1727, 1552, 1436, 1267, 1099, 1042, 911, 782, 741, 698 cm<sup>-1</sup>; HRMS (ESI): Exact mass calcd for  $C_{13}H_{15}BrNO_3$   $[M+H]^+$  312.0230, found 312.0231.

**3-(2-Methoxycarbonyl-5-methyl)phenyl-5,5-diphenylisoxazoline.** Isolated as colorless prisms (866.5 mg, 58%) by silica gel column chromatography (55 g, Hexane:EtOAc = 92:8, v/v) following the general procedure (methyl 2-[(chlorohydroxyimino)methyl]-4-methylbenzoate: 911.0 mg, 4.00 mmol; diphenylethylene: 2.26 mL, 16.0 mmol; Et<sub>3</sub>N: 0.84 mL, 6.00 mmol; toluene: 16 mL; reflux: 17 h). Mp. 150-151 °C;  $R_f$  = 0.35 (Hexane:EtOAc = 86:14, v/v); <sup>1</sup>H NMR (300 MHz, CDCl<sub>3</sub>) δ 2.38 (3H, s), 3.46 (3H, s), 3.94 (2H, s), 7.21 (1H, m), 7.25-7.40 (7H, m), 7.46-7.52 (4H, m), 7.82 (1H, d, *J* = 7.9 Hz); <sup>13</sup>C NMR (75 MHz, CDCl<sub>3</sub>) δ 21.2 (CH<sub>3</sub>), 51.7 (CH<sub>2</sub>), 51.8 (CH<sub>3</sub>), 92.0 (C), 126.1 (CH), 127.4 (C), 127.5 (CH), 128.3 (CH), 130.2 (CH), 130.5 (C), 130.6 (CH), 130.7 (CH), 142.7 (C), 144.4 (C), 157.8 (C), 167.2 (C); IR (KBr) 1721, 1604, 1439, 1271, 1106, 912, 835, 784, 758, 703 cm<sup>-1</sup>; HRMS (ESI): Exact mass calcd for  $C_{24}H_{22}NO_3$   $[M+H]^+$  372.1594, found 372.1592.

**3-(2-Methoxycarbonyl)phenyl-5,5-diphenylisoxazoline.** Isolated as colorless powder (1.79 g, 56%) by recrystallization from EtOAc (6 mL) following the general procedure (methyl 2-[(chlorohydroxyimino)methyl]benzoate: 1.92 g, 8.99 mmol; diphenylethylene: 6.60 mL, 40.0 mmol; Et<sub>3</sub>N: 2.00 mL, 15.0 mmol; toluene: 65 mL; reflux: 17 h).  $R_f$  = 0.30 (Hexane:EtOAc = 67:33, v/v); <sup>1</sup>H NMR (300 MHz, CDCl<sub>3</sub>) δ 3.50 (3H, s), 3.95 (2H, s), 7.26-7.55 (13H, m), 7.88 (1H, m); <sup>13</sup>C NMR (75 MHz, CDCl<sub>3</sub>) δ 51.4 (CH<sub>2</sub>), 52.1 (CH<sub>3</sub>), 92.2 (C), 126.2 (CH), 127.6 (CH), 128.4 (CH), 129.6 (CH), 129.8 (CH), 130.3 (C), 130.4 (CH), 130.6 (C), 131.9 (CH), 144.3 (C), 157.4 (C), 167.5 (C); IR (KBr) 3064, 2957, 1717, 1488, 1336, 1092, 1000, 893, 754, 700 cm<sup>-1</sup>; HRMS (ESI): Exact mass calcd for

C<sub>23</sub>H<sub>20</sub>NO<sub>3</sub> [M+H]<sup>+</sup> 358.1438, found 358.1436.

**3-(2-Methoxycarbonyl)phenyl-5,5-diethylisoxazoline.** Isolated as colorless oil (1.99 g, 51%) by silica gel column chromatography (60 g, Hexane:EtOAc = 95:5, v/v) following the general procedure (methyl 2-[(chlorohydroxyimino)methyl]benzoate: 3.20 g, 15.0 mmol; 2-ethyl-1-butene: 7.32 mL, 60.0 mmol; Et<sub>3</sub>N: 3.14 mL, 22.5 mmol; toluene: 60 mL; reflux: 8.5 h). R<sub>f</sub> = 0.34 (Hexane:EtOAc = 86:14, v/v); <sup>1</sup>H NMR (300 MHz, CDCl<sub>3</sub>) δ 0.99 (6H, t, *J* = 7.4 Hz), 1.775 (2H, q, *J* = 7.4 Hz), 1.780 (2H, q, *J* = 7.4 Hz), 3.04 (2H, s), 3.89 (3H, s), 7.42-7.56 (3H, m), 7.83 (1H, m); <sup>13</sup>C NMR (75 MHz, CDCl<sub>3</sub>) δ 8.1 (CH<sub>3</sub>), 30.5 (CH<sub>2</sub>), 44.9 (CH<sub>2</sub>), 52.4 (CH<sub>3</sub>), 90.7 (C), 129.1 (CH), 129.4 (CH), 129.9 (CH), 130.6 (C), 131.2 (C), 131.6 (CH), 156.6 (C), 167.7 (C); IR (neat) 2969, 1728, 1434, 1294, 759, 447, 431, 421, 411 cm<sup>-1</sup>; HRMS (ESI): Exact mass calcd for C<sub>15</sub>H<sub>19</sub>O<sub>3</sub>NNa [M+Na]<sup>+</sup> 284.1257, found 284.1266.

**3-(5-Bromo-2-diazoacetyl)phenyl-5,5-dimethylisoxazoline (4a).** To a solution of 3-(5-bromo-2-methoxycarbonyl)phenyl-5,5-diphenylisoxazoline (1.40 g, 4.50 mmol) in MeOH (64 mL) and water (16 mL) was added NaOH (0.684 g, 17.1 mmol), and the mixture was refluxed for 1 h. After cooling the mixture to room temperature, the mixture was acidified (pH 1) with 1 M HCl aq, and then extracted with CHCl<sub>3</sub> (30 mL×3). The organic extracts were dried over MgSO<sub>4</sub> and concentrated. The corresponding crude carboxylic acid was obtained as white solid and was used without purification for the synthesis of **4a**. To a solution of the resulting acid in Et<sub>2</sub>O (40 mL) were added methyl chloroformate (0.31 mL, 4.00 mmol) and Et<sub>3</sub>N (0.61 mL, 4.40 mmol) successively. The mixture was stirred for 2 h at room temperature, and then filtered to remove Et<sub>3</sub>N•HCl. The filtrate was added at 0 °C over a period of 30 min to a solution of CH<sub>2</sub>N<sub>2</sub> in Et<sub>2</sub>O. The mixture was stirred at room temperature for 1 day, and then concentrated. Silica gel column chromatography (40 g, Hexane:EtOAc = 80:20, v/v) yielded **4a** (0.985 g, 68% (3 steps)) as yellow prisms. Mp. 115-116 °C; R<sub>f</sub> = 0.25 (Hexane:EtOAc = 75:25, v/v); <sup>1</sup>H NMR (300 MHz, CDCl<sub>3</sub>) δ 1.50 (6H, s), 3.04 (2H, s), 5.61 (1H, brs), 7.33 (1H, d, *J* = 8.2 Hz), 7.57 (1H, dd, *J* = 2.0, 8.2 Hz), 7.67 (1H, d, *J* = 2.0 Hz); <sup>13</sup>C NMR (75 MHz, CDCl<sub>3</sub>) δ 27.2 (CH<sub>3</sub>), 49.0 (CH<sub>2</sub>), 57.0 (CH), 86.0 (C), 125.1 (C), 128.9 (CH), 131.0 (C), 132.3 (CH), 132.4 (C), 136.7 (C), 155.7 (C), 187.7 (C); IR (KBr) 3073, 2108, 1605, 1550, 1360, 1227, 1107, 1024, 907, 873, 829, 748 cm<sup>-1</sup>.

**3-(2-Diazoacetyl-5-methyl)phenyl-5,5-dimethylisoxazoline (4c).** To a solution of 3-(2-methoxy-

carbonyl-5-methyl)phenyl-5,5-dimethylisoxazoline (1.53 g, 6.20 mmol) in MeOH (72 mL) and water (18 mL) was added NaOH (0.94 g, 23.6 mmol), and the mixture was refluxed for 1 h. After cooling the mixture to room temperature, the mixture was acidified (pH 1) with 1 M HCl aq, and then extracted with CHCl<sub>3</sub> (30 mL×3). The organic extracts were dried over MgSO<sub>4</sub> and concentrated. The corresponding crude carboxylic acid was obtained as white solid and was used without purification for the synthesis of **4c**. To a solution of the resulting acid in Et<sub>2</sub>O (30 mL) were added ethyl chloroformate (0.40 mL, 4.20 mmol) and Et<sub>3</sub>N (0.60 mL, 4.20 mmol) successively. The mixture was stirred for 2 h at room temperature, and then filtered to remove Et<sub>3</sub>N•HCl. The filtrate was added at 0 °C over a period of 30 min to a solution of CH<sub>2</sub>N<sub>2</sub> in Et<sub>2</sub>O. The mixture was stirred at room temperature for 1 day, and then concentrated. Silica gel column chromatography (35 g, Hexane:EtOAc = 90:10, v/v) yielded **4c** (0.544 g, 34% (3 steps)) as brown plates. Mp. 78-80 °C; R<sub>f</sub> = 0.45 (Hexane:EtOAc = 60:40, v/v); <sup>1</sup>H NMR (300 MHz, CDCl<sub>3</sub>) δ 1.50 (6H, s), 2.39 (3H, s), 3.05 (2H, s), 5.65 (1H, brs), 7.24 (1H, d, *J* = 7.9 Hz), 7.32 (1H, m), 7.37 (1H, d, *J* = 7.9 Hz); <sup>13</sup>C NMR (75 MHz, CDCl<sub>3</sub>) δ 21.2 (CH<sub>3</sub>), 27.2 (CH<sub>3</sub>), 49.5 (CH<sub>2</sub>), 56.5 (CH), 85.4 (C), 127.5 (CH), 129.2 (C), 129.9 (CH), 130.2 (CH), 135.1 (C), 141.5 (C), 157.3 (C), 188.5 (C); IR (KBr) 3067, 2106, 1604, 1358, 911, 847, 765, 697, 611 cm<sup>-1</sup>; HRMS (ESI): Exact mass calcd for C<sub>14</sub>H<sub>15</sub>N<sub>3</sub>NaO<sub>2</sub> [M+Na]<sup>+</sup> 280.1056, found 280.1070.

**3-(2-Diazoacetyl-5-methyl)phenyl-5,5-diphenylisoxazoline (4d)**. To a solution of 3-(2-methoxycarbonyl-5-methyl)phenyl-5,5-diphenylisoxazoline (1.48 g, 4.00 mmol) in MeOH (48 mL) and water (12 mL) was added NaOH (0.608 g, 15.2 mmol), and the mixture was refluxed for 2.5 h. After cooling the mixture to room temperature, the mixture was acidified (pH 1) with 1 M HCl aq, and then extracted with CHCl<sub>3</sub> (30 mL×3). The organic extracts were dried over MgSO<sub>4</sub> and concentrated. The corresponding crude carboxylic acid was obtained as white solid and was used without purification for the synthesis of **4d**. To a solution of the resulting acid in Et<sub>2</sub>O (21 mL) were added ethyl chloroformate (0.25 mL, 2.60 mmol) and Et<sub>3</sub>N (0.40 mL, 2.90 mmol) successively. The mixture was stirred for 2 h at room temperature, and then filtered to remove Et<sub>3</sub>N•HCl. The filtrate was added at 0 °C over a period of 30 min to a solution of CH<sub>2</sub>N<sub>2</sub> in Et<sub>2</sub>O. The mixture was stirred at room temperature for 1 day, and then concentrated. Silica gel column chromatography (15 g, CH<sub>2</sub>Cl<sub>2</sub>) yielded **4d** (0.588 g, 38% (3 steps)) as yellow prisms. Mp. 128-130 °C; R<sub>f</sub> = 0.66 (Hexane:EtOAc = 50:50, v/v); <sup>1</sup>H NMR (300 MHz, CDCl<sub>3</sub>) δ

2.37 (3H, s), 3.92 (2H, s), 5.18 (1H, brs), 7.24-7.50 (13H, m);  $^{13}\text{C}$  NMR (125 MHz,  $\text{CDCl}_3$ )  $\delta$  21.2 ( $\text{CH}_3$ ), 51.0 ( $\text{CH}_2$ ), 57.3 (CH), 92.5 (C), 126.1 (CH), 127.7 (CH), 127.9 (CH, C), 128.4 (CH), 130.2 (CH), 130.6 (CH), 135.4 (C), 141.6 (C), 143.8 (C), 157.5 (C), 188.1 (C); IR (KBr) 2110, 1607, 1448, 1351, 915, 821, 749, 698, 509  $\text{cm}^{-1}$ ; HRMS (ESI): Exact mass calcd for  $\text{C}_{24}\text{H}_{19}\text{N}_3\text{NaO}_2$   $[\text{M}+\text{Na}]^+$  404.1369, found 404.1392.

**3-(2-Diazoacetyl)phenyl-5,5-diphenylisoxazoline (4e).** To a solution of 3-(2-methoxycarbonyl)-phenyl-5,5-diphenylisoxazoline (3.57 g, 10.0 mmol) in MeOH (134 mL) and water (33 mL) was added NaOH (0.600 g, 15.0 mmol), and the mixture was refluxed for 6 h. After cooling the mixture to room temperature, the mixture was acidified (pH 1) with 1 M HCl aq, and then extracted with  $\text{CHCl}_3$  (50 mL $\times$ 3). The organic extracts were dried over  $\text{MgSO}_4$  and concentrated. The corresponding crude carboxylic acid (2.40 g) was obtained as white solid and was used without purification for the synthesis of **4e**. The preparation of the carboxylic acid was repeated. To a solution of the resulting acid (4.12 g in total) in  $\text{Et}_2\text{O}$  (40 mL) were added ethyl chloroformate (1.30 mL, 13.2 mmol) and  $\text{Et}_3\text{N}$  (3.40 mL, 24.0 mmol) successively. The mixture was stirred for 2 h at room temperature, and then filtered to remove  $\text{Et}_3\text{N}\cdot\text{HCl}$ . The filtrate was added at 0  $^\circ\text{C}$  over a period of 30 min to a solution of  $\text{CH}_2\text{N}_2$  in  $\text{Et}_2\text{O}$ . The mixture was stirred at room temperature for 1 day, and then concentrated. Silica gel column chromatography (40 g, Hexane:EtOAc = 80:20, v/v) yielded **4e** (0.973 g) as yellow plates.  $R_f$  = 0.32 (Hexane:EtOAc = 80:20, v/v);  $^1\text{H}$  NMR (300 MHz,  $\text{CDCl}_3$ )  $\delta$  3.92 (2H, s), 5.21 (1H, brs), 7.22-7.36 (6H, m), 7.40-7.49 (8H, m);  $^{13}\text{C}$  NMR (75 MHz,  $\text{CDCl}_3$ )  $\delta$  50.6 ( $\text{CH}_2$ ), 57.4 (CH), 92.5 (C), 126.0 (CH), 127.6, (CH), 128.3 (CH), 129.4 (CH), 129.8 (CH), 129.9 (CH), 130.8 (CH), 138.1 (2C), 143.7 (C), 156.9 (C), 188.3 (C); IR (KBr) 3114, 3060, 2116, 1600, 1350, 1218, 1141, 899, 754, 699  $\text{cm}^{-1}$ ; HRMS (ESI): Exact mass calcd for  $\text{C}_{23}\text{H}_{17}\text{N}_3\text{NaO}_2$   $[\text{M}+\text{Na}]^+$  390.1213, found 390.1204.

**3-(2-Diazoacetyl)phenyl-5,5-diethylisoxazoline (4f).** To a solution of 3-(2-methoxycarbonyl)phenyl-5,5-diethylisoxazoline (1.57 g, 6.00 mmol) in MeOH (90 mL) and water (20 mL) was added NaOH (0.920 g, 23.0 mmol), and the mixture was refluxed for 1 h. After cooling the mixture to room temperature, the mixture was acidified (pH 1) with 1 M HCl aq, and then extracted with  $\text{CHCl}_3$  (30 mL $\times$ 3). The organic extracts were dried over  $\text{MgSO}_4$  and concentrated. The corresponding crude carboxylic acid was obtained as white solid and was used without purification for the synthesis of **4f**. To

a solution of the resulting acid in Et<sub>2</sub>O (20 mL) were added ethyl chloroformate (0.70 mL, 6.00 mmol) and Et<sub>3</sub>N (1.60 mL, 10.8 mmol) successively. The mixture was stirred for 2 h at room temperature, and then filtered to remove Et<sub>3</sub>N•HCl. The filtrate was added at 0 °C over a period of 30 min to a solution of CH<sub>2</sub>N<sub>2</sub> in Et<sub>2</sub>O. The mixture was stirred at room temperature for 1 day, and then concentrated. Silica gel column chromatography (40 g, Hexane:EtOAc = 80:20, v/v) yielded **4f** (0.499 g, 30% (3 steps)) as yellow prisms. Mp. 52-54 °C; R<sub>f</sub> = 0.24 (Hexane:EtOAc = 80:20, v/v); <sup>1</sup>H NMR (300 MHz, CDCl<sub>3</sub>) δ 0.98 (6H, t, *J* = 7.5 Hz), 1.75 (4H, q, *J* = 7.5 Hz), 3.04 (2H, s), 5.58 (1H, brs), 7.40-7.53 (4H, m); <sup>13</sup>C NMR (75 MHz, CDCl<sub>3</sub>) δ 8.0 (CH<sub>3</sub>), 30.5 (CH<sub>2</sub>), 44.4 (CH<sub>2</sub>), 56.7 (CH), 90.8 (C), 127.3 (CH), 128.8 (C), 129.2 (2CH), 130.6 (CH), 137.9 (C), 156.0 (C), 189.0 (C); IR (KBr) 3075, 2973, 2101, 1613, 1468, 1361, 1226, 904, 759, 706 cm<sup>-1</sup>; HRMS (ESI): Exact mass calcd for C<sub>15</sub>H<sub>17</sub>N<sub>3</sub>NaO<sub>2</sub> [M+Na]<sup>+</sup> 294.1213, found 294.1206.

### Preparation of diazo compound **4b**

Diazo compound **4b** was prepared from 3-(5-bromo-2-methoxycarbonyl)phenyl-5,5-dimethylisoxazoline using Sonogashira coupling as shown in the scheme below.

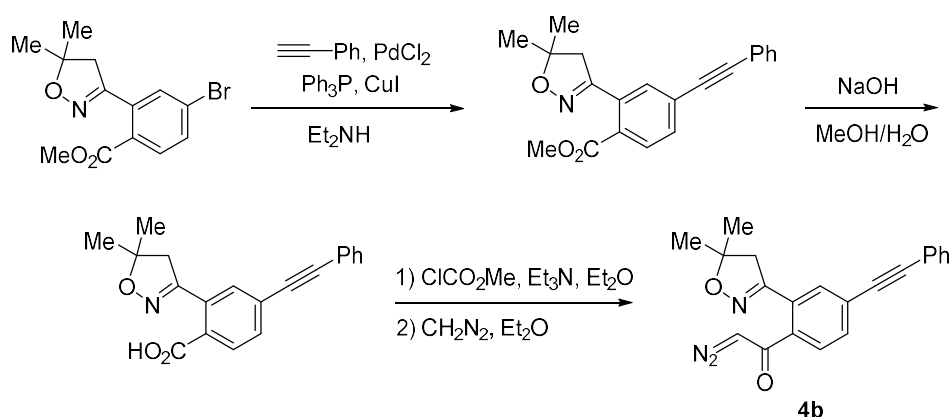

**3-(2-Methoxycarbonyl-5-phenylethynyl)phenyl-5,5-dimethylisoxazoline.** To a solution of 3-(5-bromo-2-methoxycarbonyl)phenyl-5,5-dimethylisoxazoline (936.5 mg, 3.0 mmol) in Et<sub>2</sub>NH (9 mL) were added PdCl<sub>2</sub> (53.2 mg, 0.30 mmol), Ph<sub>3</sub>P (157.4 mg, 0.60 mmol), CuI (114.3 mg, 0.60 mmol), and phenylacetylene (0.49 mL, 4.50 mmol), and then the mixture was refluxed for 10 h. After cooling the mixture to room temperature, Et<sub>2</sub>NH was removed under reduced pressure. Water (20 mL) was added to

the residue, and the organic phase was extracted with EtOAc (20 mL×3). The organic extracts were dried over Na<sub>2</sub>SO<sub>4</sub> and concentrated. Silica gel column chromatography (46 g, Hexane:EtOAc = 92:8, v/v) yielded 3-(2-methoxycarbonyl-5-phenylethynyl)phenyl-5,5-dimethylisoxazoline (736.5 mg, 74%) as brown plates. Mp. 89-90 °C; R<sub>f</sub> = 0.29 (Hexane:EtOAc = 86:14, v/v); <sup>1</sup>H NMR (500 MHz, CDCl<sub>3</sub>) δ 1.54 (6H, s), 3.09 (2H, s), 3.91 (3H, s), 7.35-7.39 (3H, m), 7.52-7.55 (2H, m), 7.58-7.61 (2H, m), 7.87 (1H, dd, *J* = 0.6, 7.9 Hz); <sup>13</sup>C NMR (125 MHz, CDCl<sub>3</sub>) δ 27.3 (CH<sub>3</sub>), 49.6 (CH<sub>2</sub>), 52.5 (CH<sub>3</sub>), 85.5 (C), 87.8 (C), 92.7 (C), 122.4 (C), 127.3 (C), 128.4 (CH), 128.9 (CH), 129.4 (C), 130.3 (CH), 131.75 (CH), 131.77 (C), 131.9 (CH), 132.6 (CH), 157.0 (C), 166.8 (C); IR (KBr) 2211, 1721, 1602, 1440, 1341, 1287, 1140, 901, 795, 760, 690 cm<sup>-1</sup>; HRMS (ESI): Exact mass calcd for C<sub>21</sub>H<sub>19</sub>NNaO<sub>3</sub> [M+Na]<sup>+</sup> 356.1257, found: 356.1262.

**3-(2-Diazoacetyl-5-phenylethynyl)phenyl-5,5-dimethylisoxazoline (4b).** To a solution of 3-(2-methoxycarbonyl-5-phenylethynyl)phenyl-5,5-dimethylisoxazoline (1.37 g, 4.10 mmol) in MeOH (60 mL) and water (15 mL) was added NaOH (0.624 g, 15.6 mmol), and the mixture was refluxed for 1.5 h. After cooling the mixture to room temperature, the mixture was acidified (pH 1) with 1 M HCl aq, and then extracted with CHCl<sub>3</sub> (30 mL×3). The organic extracts were dried over MgSO<sub>4</sub> and concentrated. The corresponding crude carboxylic acid was obtained as white solid and was used without purification for the synthesis of **4b**. To a solution of the resulting acid in Et<sub>2</sub>O (40 mL) were added methyl chloroformate (0.28 mL, 3.70 mmol) and Et<sub>3</sub>N (0.56 mL, 3.00 mmol) successively. The mixture was stirred for 2 h at room temperature, and then filtered to remove Et<sub>3</sub>N•HCl. The filtrate was added at 0 °C over a period of 30 min to a solution of CH<sub>2</sub>N<sub>2</sub> in Et<sub>2</sub>O. The mixture was stirred at room temperature for 1 day, and then concentrated. Silica gel column chromatography (50 g, Hexane:EtOAc = 90:10, v/v) yielded **4b** (1.10 g, 78% (3 steps)) as yellow prisms. Mp. 115-116 °C; R<sub>f</sub> = 0.25 (Hexane:EtOAc = 75:25, v/v); <sup>1</sup>H NMR (300 MHz, CDCl<sub>3</sub>) δ 1.51 (6H, s), 3.09 (2H, s), 5.64 (1H, brs), 7.34-7.40 (3H, m), 7.45 (1H, d, *J* = 7.9 Hz), 7.51-7.59 (3H, m), 7.66 (1H, dd, *J* = 0.5, 1.6 Hz); <sup>13</sup>C NMR (75 MHz, CDCl<sub>3</sub>) δ 27.1 (CH<sub>3</sub>), 49.0 (CH<sub>2</sub>), 56.8 (CH), 85.6 (C), 87.7 (C), 92.2 (C), 122.4 (C), 126.2 (C), 127.6 (CH), 128.4 (CH), 128.8 (CH), 129.4 (C), 131.6 (CH), 131.9 (CH), 132.3 (CH), 136.9 (C), 156.3 (C), 187.9 (C); IR (KBr) 3124, 2116, 1604, 1483, 1348, 1136, 929, 859, 793, 759, 688, 522 cm<sup>-1</sup>; HRMS (ESI): Exact mass calcd for C<sub>21</sub>H<sub>17</sub>N<sub>3</sub>NaO<sub>2</sub> [M+Na]<sup>+</sup> 366.1213, found: 366.1208.

### Preparation of diazo compound **4g**.

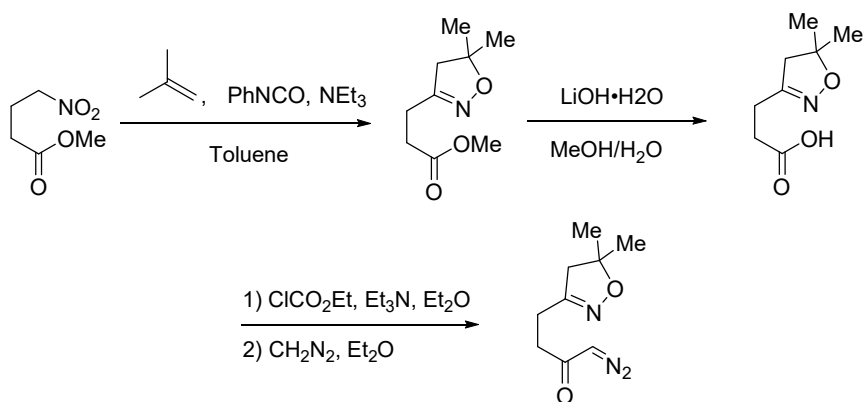

**3-(4-Diazo-3-oxopropyl)-5,5-dimethylisoxazoline (4g)**. To a solution (0 °C) of methyl 4-nitrobutyrate (3.11 g, 21.2 mmol) in toluene (53 mL) were added 2-methylpropene (10% *i*-Pr<sub>2</sub>O solution, 101 mL, 106 mmol), Et<sub>3</sub>N (5.90 mL, 42.3 mmol), and phenyl isocyanate (6.90 mL, 63.5 mmol) successively, and then the mixture was stirred at 25 °C for 66 h. The mixture was filtered through a plug of Celite, rinsed with toluene, and then concentrated. The resulting isoxazoline was used without purification. A solution of the isoxazoline in MeOH (30 mL) and water (30 mL) was added LiOH·H<sub>2</sub>O (4.44 g, 106 mmol), and then the mixture was stirred at 50 °C for 19 h. After cooling the mixture at room temperature, the mixture was filtered through a plug of Celite, and then washed with hexane (30 mL×3). The mixture was acidified (pH 2) with 0.2 M HCl aq, and then extracted with CH<sub>2</sub>Cl<sub>2</sub> (120 mL×3). The organic extracts were dried (Na<sub>2</sub>SO<sub>4</sub>) and concentrated. The resulting carboxylic acid was used without purification. To a solution of the resulting acid in Et<sub>2</sub>O (38 mL) were added ethyl chloroformate (1.07 ml, 11.3 mmol) and Et<sub>3</sub>N (3.13 mL, 22.5 mmol) successively. The mixture was stirred for 2 h at room temperature, and then filtered to remove Et<sub>3</sub>N·HCl. The filtrate was added at 0 °C over a period of 30 min to a solution of CH<sub>2</sub>N<sub>2</sub> in Et<sub>2</sub>O. The mixture was stirred at room temperature for 1 day, and then concentrated. Silica gel column chromatography (22 g, Hexane:EtOAc = 80:20, v/v) yielded **4g** (703 mg, 17% (4 steps)) as yellow liquid. *R*<sub>f</sub> = 0.30 (Hexane:EtOAc = 67:33, v/v); <sup>1</sup>H NMR (300 MHz, CDCl<sub>3</sub>) δ 1.37 (6H, s), 2.60-2.70 (6H, m), 5.34 (1H, brs); <sup>13</sup>C NMR (75 MHz, CDCl<sub>3</sub>) δ 23.1 (CH<sub>2</sub>), 26.9 (CH), 36.4 (CH<sub>2</sub>), 49.2 (CH<sub>2</sub>), 54.6 (CH), 83.6 (C), 157.4 (C), 193.0 (C); IR (neat) 3090, 2974, 2928, 2105, 1642, 1369, 1321, 1145, 895 cm<sup>-1</sup>; HRMS (ESI): Exact mass calcd for C<sub>9</sub>H<sub>13</sub>N<sub>3</sub>NaO<sub>2</sub> [M+Na]<sup>+</sup> 218.0900, found 218.0897.



### Preparation of ligand E.

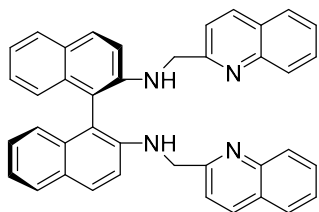

**(R)-N,N'-Bis(2-quinolylmethyl)-1,1'-binaphthyl-2,2'-diamine (ligand E).** NaBH<sub>4</sub> (79.4 mg, 2.10 mmol) was added to a solution of ligand A (300.0 mg, 0.53 mmol) in CH<sub>2</sub>Cl<sub>2</sub>/MeOH (5 mL/1 mL), and then the mixture was stirred at room temperature for 6 h. The solvent was removed in vacuo, and the residue was purified by silica gel column chromatography (8.5 g, Hexane:EtOAc = 85:15, v/v) to provide ligand E (298.3 mg, 99%) as yellow prisms. Mp. 81-84 °C; [ $\alpha$ ]<sub>D</sub><sup>26</sup> +50.6 (*c* 1.0, CHCl<sub>3</sub>); R<sub>f</sub> = 0.30 (Hexane:EtOAc = 85:15, v/v); <sup>1</sup>H NMR (300 MHz, C<sub>6</sub>D<sub>6</sub>)  $\delta$  4.20-4.33 (4H, m), 5.18 (2H, t, *J* = 5.8 Hz), 6.95 (2H, d, *J* = 8.5 Hz), 7.04-7.14 (6H, m), 7.24-7.36 (8H, m), 7.42-7.48 (2H, m), 7.69-7.78 (4H, m), 7.97-8.03 (2H, m); <sup>13</sup>C NMR (75 MHz, C<sub>6</sub>D<sub>6</sub>)  $\delta$  49.7 (CH<sub>2</sub>), 113.0 (C), 114.7 (CH), 119.3 (CH), 122.4 (CH), 124.7 (CH), 126.1 (CH), 127.3 (CH), 127.5 (C), 127.6 (CH), 128.5 (C), 128.7 (CH), 129.4 (CH), 129.6 (CH), 130.2 (CH), 134.9 (C), 136.1 (CH), 144.7 (C), 148.1 (C), 159.9 (C); IR (KBr) 3362, 3053, 1686, 1618, 1595, 1503, 1425, 817, 772, 748 cm<sup>-1</sup>; HRMS (ESI): Exact mass calcd for C<sub>40</sub>H<sub>30</sub>N<sub>4</sub>Na [M+Na]<sup>+</sup> 589.2362, found 589.2363.

## Reactions of diazo *O*-methyloxime **1a** with acryloyloxazolidinone **S1**

**Table S1.** Reactions of diazo *O*-methyloxime **1a** with acryloyloxazolidinone **S1** in the presence of metal salts as a Lewis acid catalyst<sup>a</sup>

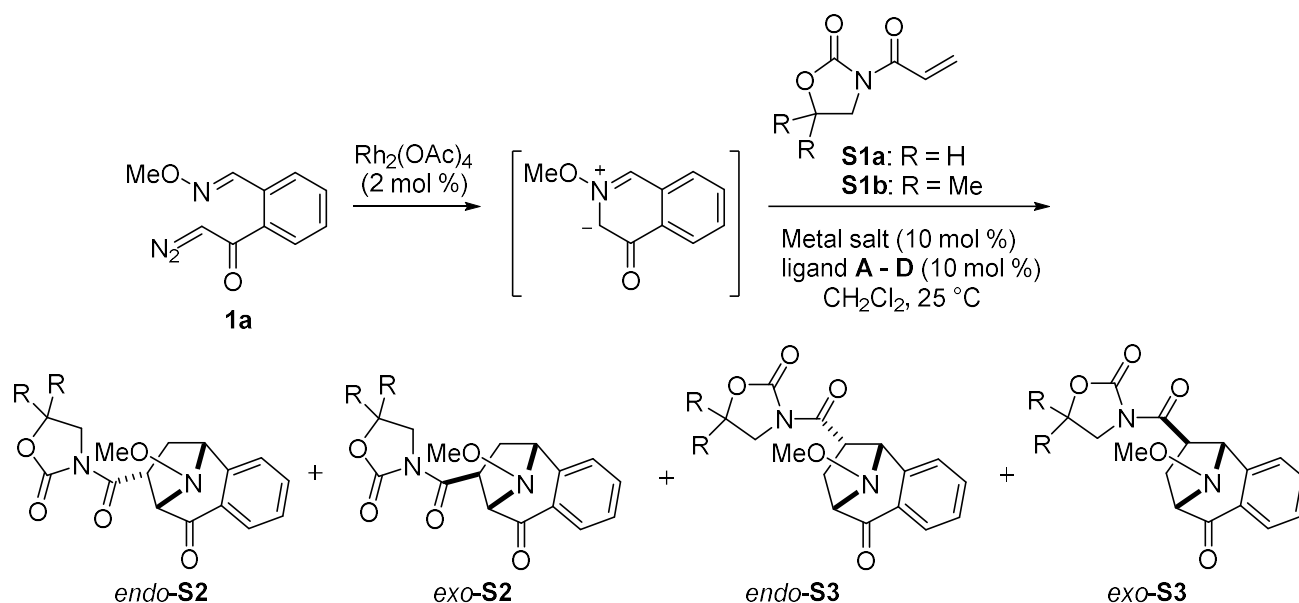

| Entry | R  | Metal salt                                              | Ligand   | Yield (%) | Ratio <sup>b</sup> | Ee (%) <sup>c</sup> |
|-------|----|---------------------------------------------------------|----------|-----------|--------------------|---------------------|
| 1     | H  | $\text{Yb}(\text{OTf})_3^d$                             | none     | 15        | 0:0:34:66          | -, -, -             |
| 2     | H  | $\text{Sc}(\text{OTf})_3^d$                             | none     | 14        | 26:0:24:50         | -, -, -             |
| 3     | H  | $\text{Ni}(\text{ClO}_4)_2 \cdot 6\text{H}_2\text{O}^d$ | none     | 50        | 29:6:46:19         | -, -, -             |
| 4     | H  | $\text{Co}(\text{ClO}_4)_2 \cdot 6\text{H}_2\text{O}^d$ | none     | 40        | 41:0:59:0          | -, -, -             |
| 5     | H  | $\text{Ni}(\text{BF}_4)_2 \cdot 6\text{H}_2\text{O}^d$  | none     | 59        | 25:8:52:15         | -, -, -             |
| 6     | H  | $\text{Ni}(\text{ClO}_4)_2 \cdot 6\text{H}_2\text{O}$   | <b>B</b> | 85        | 22:13:33:32        | 41, 36, 46          |
| 7     | H  | $\text{Ni}(\text{ClO}_4)_2 \cdot 6\text{H}_2\text{O}$   | <b>C</b> | 78        | 19:5:49:27         | 49, 37, 70          |
| 8     | H  | $\text{Ni}(\text{ClO}_4)_2 \cdot 6\text{H}_2\text{O}$   | <b>D</b> | 79        | 16:2:46:36         | 41, 40, 71          |
| 9     | Me | $\text{Ni}(\text{ClO}_4)_2 \cdot 6\text{H}_2\text{O}^d$ | <b>A</b> | 90        | 24:21:28:27        | 62, 25, 38          |
| 10    | Me | $\text{Ni}(\text{ClO}_4)_2 \cdot 6\text{H}_2\text{O}$   | <b>B</b> | 62        | 28:9:38:25         | 73, 69, 49          |
| 11    | Me | $\text{Ni}(\text{ClO}_4)_2 \cdot 6\text{H}_2\text{O}^d$ | <b>B</b> | 91        | 27:21:27:25        | 81, 75, 47          |

**Table S1.** (Continued)

| Entry           | R  | Metal salt                                                         | Ligand   | Yield (%) | Ratio <sup>b</sup> | Ee (%) <sup>c</sup> |
|-----------------|----|--------------------------------------------------------------------|----------|-----------|--------------------|---------------------|
| 12              | Me | Ni(ClO <sub>4</sub> ) <sub>2</sub> •6H <sub>2</sub> O <sup>d</sup> | <b>C</b> | 76        | 24:14:45:17        | 79, 76, 47          |
| 13              | Me | Ni(ClO <sub>4</sub> ) <sub>2</sub> •6H <sub>2</sub> O <sup>d</sup> | <b>D</b> | 71        | 29:9:38:24         | 84, 83, 55          |
| 14 <sup>e</sup> | Me | Ni(ClO <sub>4</sub> ) <sub>2</sub> •6H <sub>2</sub> O <sup>d</sup> | <b>D</b> | 91        | 28:5:41:26         | 88, 74, 51          |

<sup>a</sup>The reaction was carried out by adding a solution of diazo compound **1a** (0.5 mmol) over a period of 3 h to a solution of oxazolidinone **S1a** or **S1b** (1.0 mmol), and Rh<sub>2</sub>(OAc)<sub>4</sub> (0.01 mmol) in CH<sub>2</sub>Cl<sub>2</sub>. <sup>b</sup>The ratio of *endo*-**S2**, *exo*-**S2**, *endo*-**S3**, and *exo*-**S3** was determined by <sup>1</sup>H NMR analysis. <sup>c</sup>The ee values of *endo*-**S2**, *endo*-**S3**, and *exo*-**S3** were determined by chiral-phase HPLC. <sup>d</sup>20 mol % of catalyst was used. <sup>e</sup>Addition of **1a** over a period of 6 h.

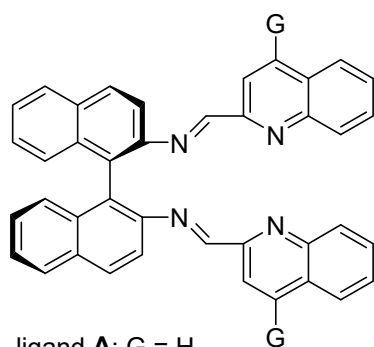

ligand **A**: G = H  
ligand **B**: G = Me  
ligand **C**: G = Ph  
ligand **D**: G = 3,5-xyllyl

### Optimization of conditions for asymmetric cycloadditions using *O*-methyloxime **1a**

Preparation of the chiral Cu(II) catalyst and the cycloaddition under oxygen atmosphere showed satisfactory results in terms of reproducibility.

**Table S2.** Optimization of conditions for the reaction of *O*-methyloxime **1a** with pyrazolidinone **2b**<sup>a</sup>

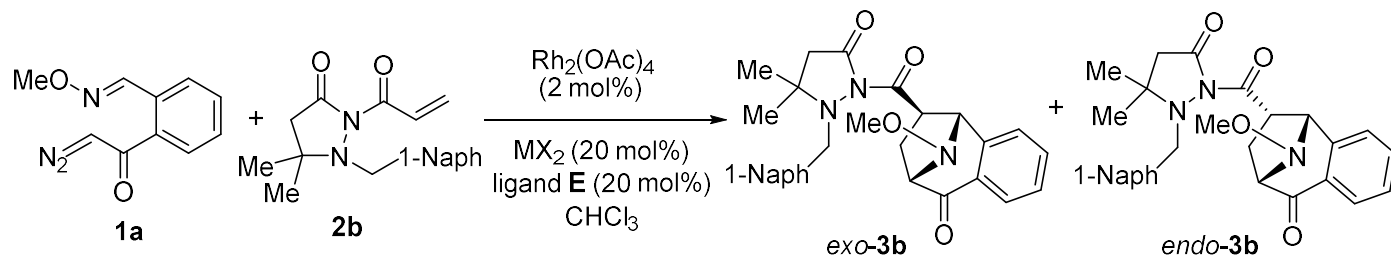

| Entry | Metal salt (mol%)                                          | Atmosphere | Temp (°C) | Yield (%) | <i>endo:exo</i> <sup>b</sup> | Ee (%) <sup>c</sup> |
|-------|------------------------------------------------------------|------------|-----------|-----------|------------------------------|---------------------|
| 1     | Cu(OTf) <sub>2</sub> (20)                                  | Argon      | 26        | 47 - 91   | 68:32 - >99:1                | 3 - 99              |
| 2     | Cu(OTf) <sub>2</sub> (30)                                  | Argon      | 26        | 73 - 80   | 69:31 - 95:5                 | 65 - 93             |
| 3     | Cu(OTf) <sub>2</sub> (30)                                  | Air        | 26        | 93        | >99:1                        | 97                  |
| 4     | Cu(OTf) <sub>2</sub> (20)                                  | Air        | 26        | 76 - 98   | 96:4 - >99:1                 | 93 - 97             |
| 5     | Cu(OTf) <sub>2</sub> (20)                                  | Air        | 35        | 98        | >99:1                        | 97                  |
| 6     | Cu(OTf) <sub>2</sub> (20)                                  | Oxygen     | 35        | 95 - 97   | >99:1                        | 97 - 99             |
| 7     | CuPF <sub>4</sub> (MeCN) <sub>4</sub> (20)                 | Oxygen     | 35        | 64        | 47:53                        | -22                 |
| 8     | Zn(OTf) <sub>2</sub> (20)                                  | Argon      | 35        | 87        | 90:10                        | 89                  |
| 9     | Zn(ClO <sub>4</sub> ) <sub>2</sub> ·6H <sub>2</sub> O (20) | Argon      | 35        | 86        | 98:2                         | 91                  |

<sup>a</sup>The reaction was carried out by adding a solution of diazo compound **1a** over a period of 3 h to a solution of pyrazolidinone **2b** (1.0 mmol), Rh<sub>2</sub>(OAc)<sub>4</sub> (0.01 mmol), and a chiral Lewis acid prepared from MX<sub>2</sub> (0.1 mmol) and ligand **E** (0.1 mmol) in CHCl<sub>3</sub>. <sup>b</sup>Determined by <sup>1</sup>H NMR analysis. <sup>c</sup>The ee values for *exo*-**3b** was determined by chiral-phase HPLC after hydrogenation.

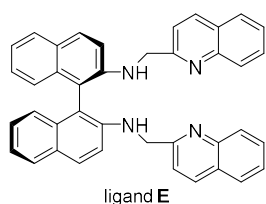

ligand **E**

### Optimization of chiral Lewis acids for asymmetric cycloadditions using diazo isoxazolines **4**

**Table S3.** Reactions of diazo isoxazolines **4** with pyrazolidinone **2b** in the presence of several chiral Lewis acids<sup>a</sup>

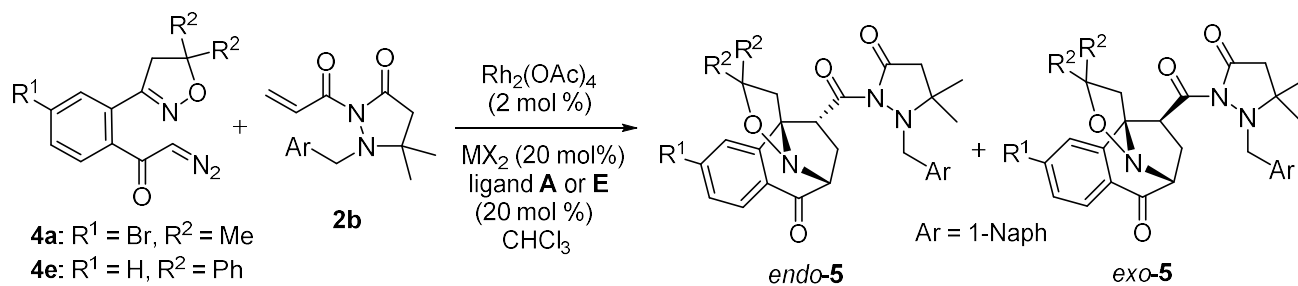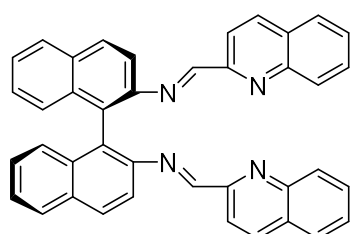

ligand **A**

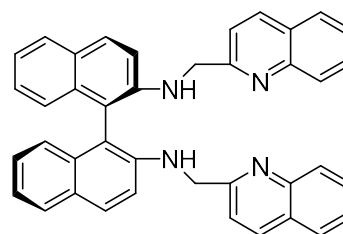

ligand **E**

| Entry | <b>4</b>  | MX <sub>2</sub>                                       | Ligand   | Temp (°C) | Yield (%) | <i>endo:exo</i> <sup>b</sup> | Ee (%) <sup>c</sup> |
|-------|-----------|-------------------------------------------------------|----------|-----------|-----------|------------------------------|---------------------|
| 1     | <b>4a</b> | Ni(BF <sub>4</sub> ) <sub>2</sub> •6H <sub>2</sub> O  | <b>A</b> | 50        | 67        | >99:1                        | 96                  |
| 2     | <b>4a</b> | Cu(OTf) <sub>2</sub>                                  | <b>E</b> | 26        | 28        | >99:1                        | 0                   |
| 3     | <b>4e</b> | Ni(ClO <sub>4</sub> ) <sub>2</sub> •6H <sub>2</sub> O | <b>A</b> | 26        | 40        | >99:1                        | 86                  |
| 4     | <b>4e</b> | Ni(ClO <sub>4</sub> ) <sub>2</sub> •6H <sub>2</sub> O | <b>A</b> | 50        | 57        | >99:1                        | 86                  |
| 5     | <b>4e</b> | Ni(BF <sub>4</sub> ) <sub>2</sub> •6H <sub>2</sub> O  | <b>A</b> | 50        | 60        | >99:1                        | 89                  |
| 6     | <b>4e</b> | Co(ClO <sub>4</sub> ) <sub>2</sub> •6H <sub>2</sub> O | <b>A</b> | 50        | 42        | >99:1                        | 69                  |
| 7     | <b>4e</b> | Co(BF <sub>4</sub> ) <sub>2</sub> •6H <sub>2</sub> O  | <b>A</b> | 50        | 42        | >99:1                        | 35                  |
| 8     | <b>4e</b> | Cu(ClO <sub>4</sub> ) <sub>2</sub> •6H <sub>2</sub> O | <b>E</b> | 26        | 21        | >99:1                        | 1                   |

<sup>a</sup>The reaction was carried out by adding a solution of diazo compound **4a** or **4e** (0.5 mmol) over a period of 3 h to a solution of pyrazolidinone **2b** (1.0 mmol), Rh<sub>2</sub>(OAc)<sub>4</sub> (0.01 mmol), and a chiral Lewis acid prepared from MX<sub>2</sub> (0.1 mmol) and ligand **A** or **E** (0.1 mmol) in CHCl<sub>3</sub>. <sup>b</sup>Determined by <sup>1</sup>H NMR analysis. <sup>c</sup>The ee values for *endo*-**5** were determined by chiral-phase HPLC.

### X-ray crystallographic analysis

To determine the absolute configuration of cycloadduct *exo-3b*, X-ray analysis was carried out using the single crystal of *p*-bromobenzoyl ester **7**, which was obtained by the hydrogenation followed by esterification of *exo-3b*. The crystal was grown in CH<sub>2</sub>Cl<sub>2</sub> under hexane atmosphere (Figure S1).

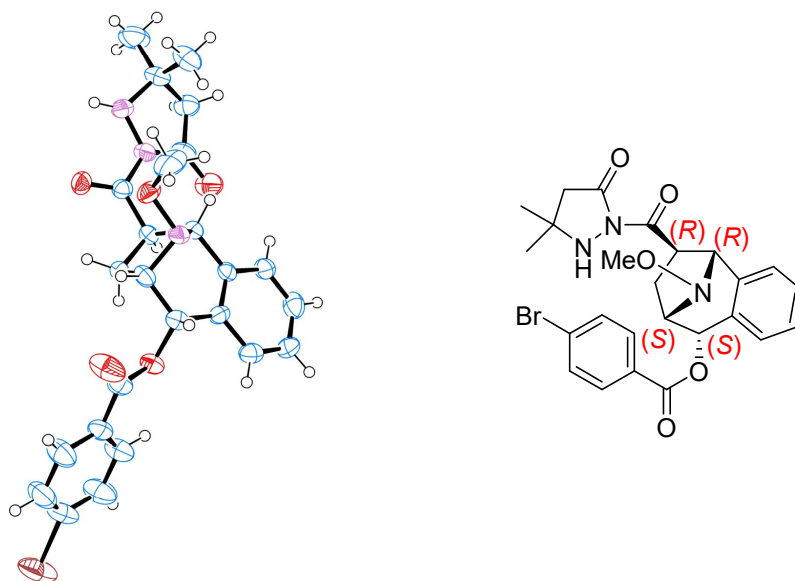

**Figure S1.** ORTEP drawing (50% probability ellipsoids) of **7**.

### Determination of the absolute configuration of alcohol S4 derived from *endo*-5f

To determine the absolute configuration of cycloadduct *endo*-5f, modified Mosher's method<sup>7</sup> was used for secondly alcohol S4. The corresponding (*S*)-MTPA-S4 and (*R*)-MTPA-S4 were prepared using (*R*)-MTPACl and (*S*)-MTPACl in the normal procedure, respectively.<sup>8</sup> Chemical shifts of H<sub>a</sub> – H<sub>e</sub> (<sup>1</sup>H NMR) for (*S*)-MTPA-S4 and (*R*)-MTPA-S4, and  $\Delta\delta^{SR} = \delta^S - \delta^R$  were shown in Figure S2. Chemical shifts of C<sub>a</sub> – C<sub>d</sub> (<sup>13</sup>C NMR) for (*S*)-MTPA-S4 and (*R*)-MTPA-S4, and  $\Delta\delta^{SR} = \delta^S - \delta^R$  were shown in Figure S3. The sign of  $\Delta\delta^{SR}$  values indicates that secondly alcohol S4 possesses (*R*)-configuration.

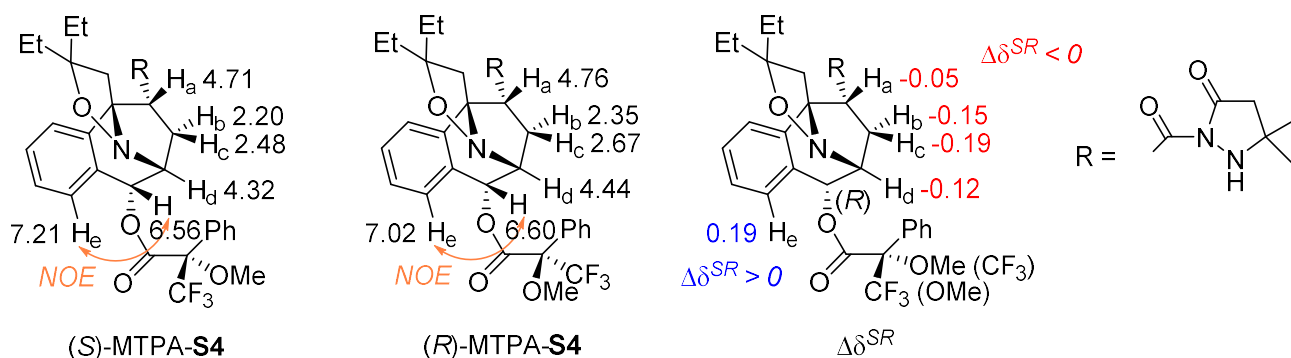

**Figure S2.**  $\Delta\delta^{SR}$  values from <sup>1</sup>H NMR spectra of different MTPA esters.

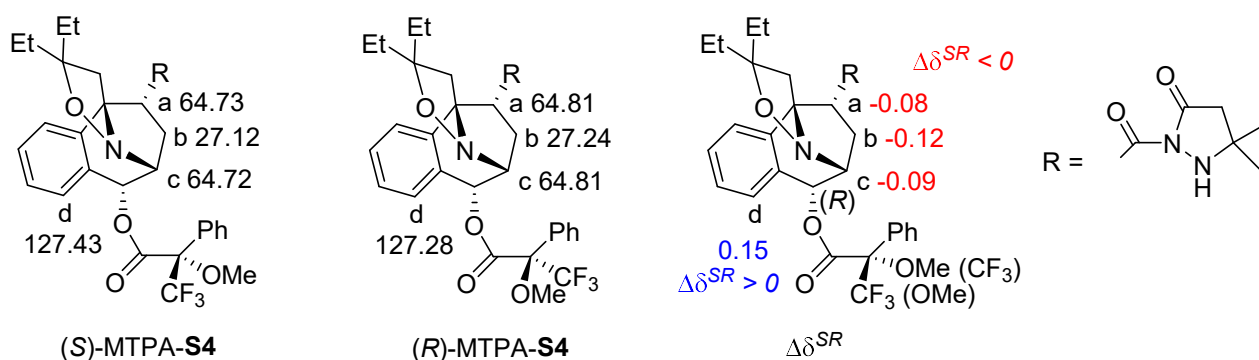

**Figure S3.**  $\Delta\delta^{SR}$  values from <sup>13</sup>C NMR spectra of different MTPA esters.

### **$^{19}\text{F}$ NMR of (*S*)-MTPA-S4 and (*R*)-MTPA-S4**

The chemical shift of the  $\text{CF}_3$  ( $^{19}\text{F}$  NMR) group on (*S*)-MTPA-S4 was observed at a higher field than that of (*R*)-MTPA-S4 by 0.25 ppm (Figure S4). (*R*)-MTPA-S4 probably exists in a conformation in which the methine proton, the carbonyl, and the  $\text{CF}_3$  groups are situated in the same plane where the phenyl ring is opposite to the least bulky substituent of the corresponding alcohol.<sup>7</sup> This observation indicates that the  $\text{CF}_3$  group of (*S*)-MTPA-S4 would be shielded with the carbonyl group of MTPA ester.

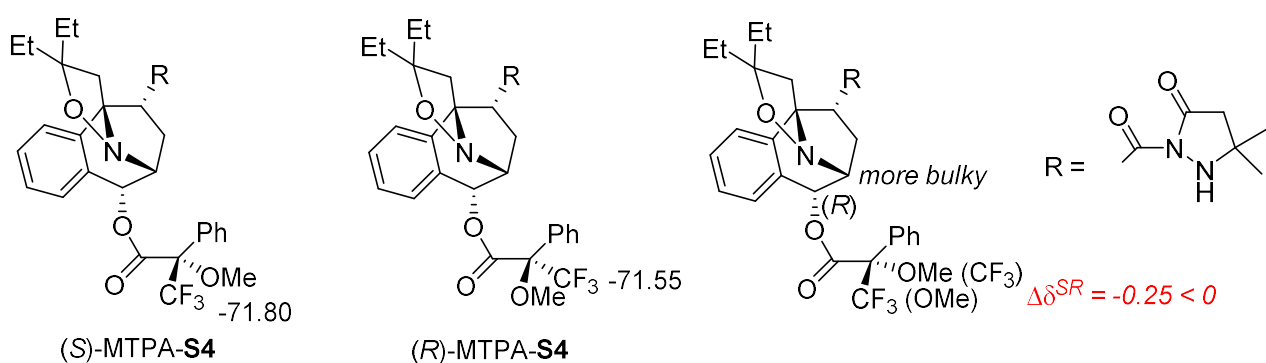

**Figure S4.**  $^{19}\text{F}$  NMR spectra of different MTPA esters.



**Proposed transition state models for the cyclic azomethine ylides**

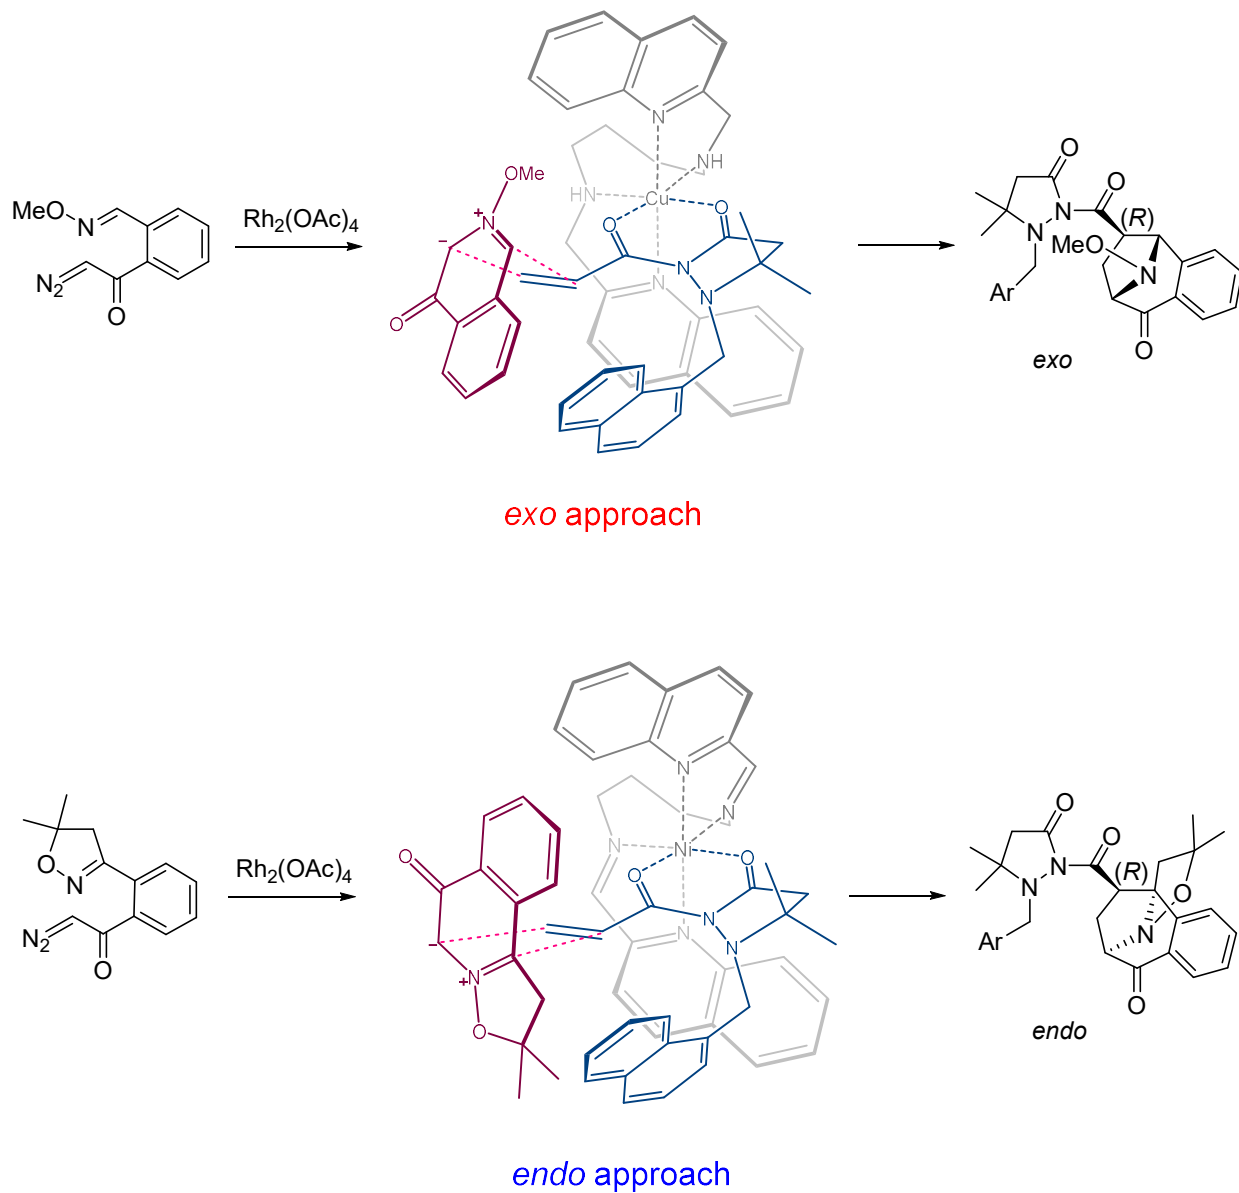

**Scheme S1.** Proposed *exo* and *endo* approach for the cyclic azomethine ylides using Cu(II)-ligand **E** and Ni(II)-ligand **A** complexes

## References

- (1) Padwa, A.; Dean, D. C.; Osterhout, M. H.; Precedo, L.; Semones, M. A. *J. Org. Chem.* **1994**, *59*, 5347-5357.
- (2) (a) Sibi, M. P.; Stanley, L. M.; Nie, X.; Venkatraman, L.; Liu, M.; Jasperse, C. P. *J. Am. Chem. Soc.* **2007**, *129*, 395-405. (b) Sibi, M. P.; Ma, Z.; Jasperse, C. P. *J. Am. Chem. Soc.* **2004**, *126*, 718-719.
- (3) (a) Suga, H.; Kakehi, A.; Mitsuda, M. *Bull. Chem. Soc. Jpn.* **2004**, *77*, 561-568. (b) Suga, H.; Kitamura, T.; Kakehi, A.; Baba, T. *Chem. Commun.* **2004**, 1414-1415. (c) Suga, H.; Nakajima, T.; Itoh, K.; Kakehi, A. *Org. Lett.* **2005**, *7*, 1431-1434. (d) Suga, H.; Funyu, A.; Kakehi, A. *Org. Lett.* **2007**, *9*, 97-100. (e) Suga, H.; Adachi, Y.; Fujimoto, K.; Furihata, Y.; Tsuchida, T.; Kakehi, A.; Baba, T. *J. Org. Chem.* **2009**, *74*, 1099-1113.
- (4) He, Y.; Cheng, C.; Chen, B.; Duan, K.; Zhuang, Y.; Yuan, B.; Zhang, M.; Zhou, Y.; Zhou, Z.; Su, Y.-J.; Cao, R.; Qiu, L. *Org. Lett.* **2014**, *16*, 6366-6369.
- (5) Beck, D. E.; Lv, W.; Abdelmalak, M.; Plescia, C. B.; Agama, K.; Marchand, C.; Pommier, Y.; Cushman, M. *Bioorg. Med. Chem.* **2016**, *24*, 1469-1479.
- (6) (a) Howe, R. K.; Schlepplik, F. M. *J. Heterocyclic Chem.* **1982**, *19*, 721-726. (b) Hirose, H.; Yamasaki, T.; Ogino, M.; Mizojiri, R.; Tamura-Okano, Y.; Yashiro, H.; Muraki, Y.; Nakano, Y.; Sugama, J.; Hata, A.; Iwasaki, S.; Watanabe, M.; Maekawa, T.; Kasai, S. *Bioorg. Med. Chem.* **2017**, *25*, 4175-4193.
- (7) Seco, J. M.; Quiñoá, E.; Riguera R. *Chem. Rev.* **2004**, *104*, 17-117.
- (8) Kail, D. C.; Krizkova, P. M.; Wieczorek, A.; Hammerschmidt, F. *Chem. Eur. J.* **2014**, *20*, 4086-4091.

# $^1\text{H}$ and $^{13}\text{C}$ NMR of *exo*-3b

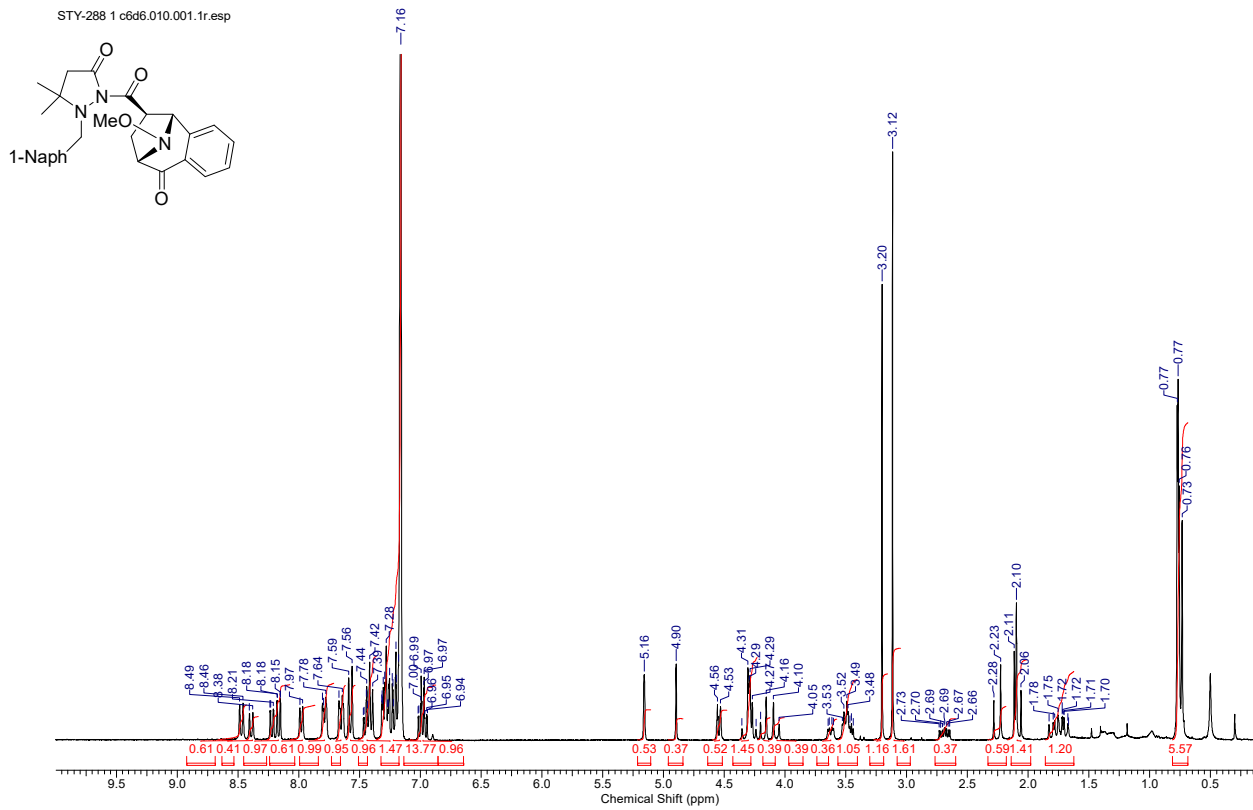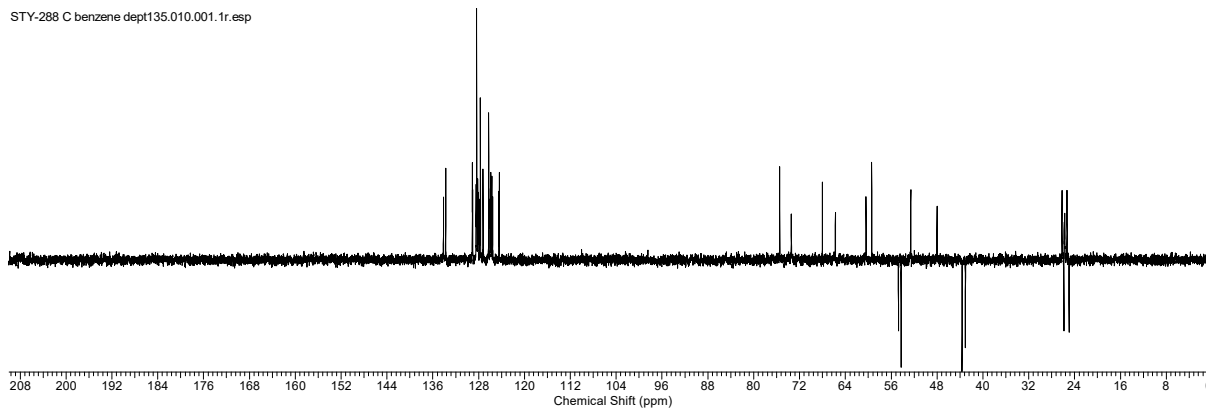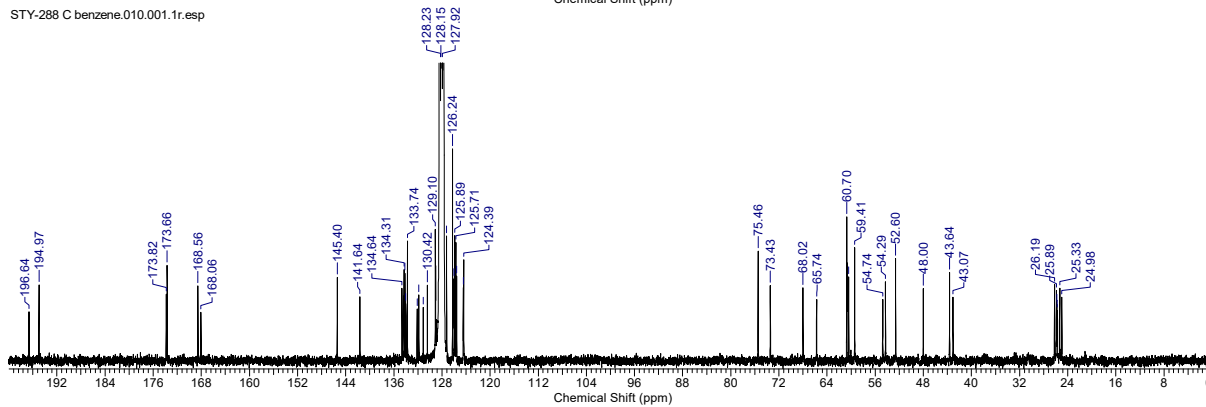

# $^1\text{H}$ and $^{13}\text{C}$ NMR of *exo*-3c

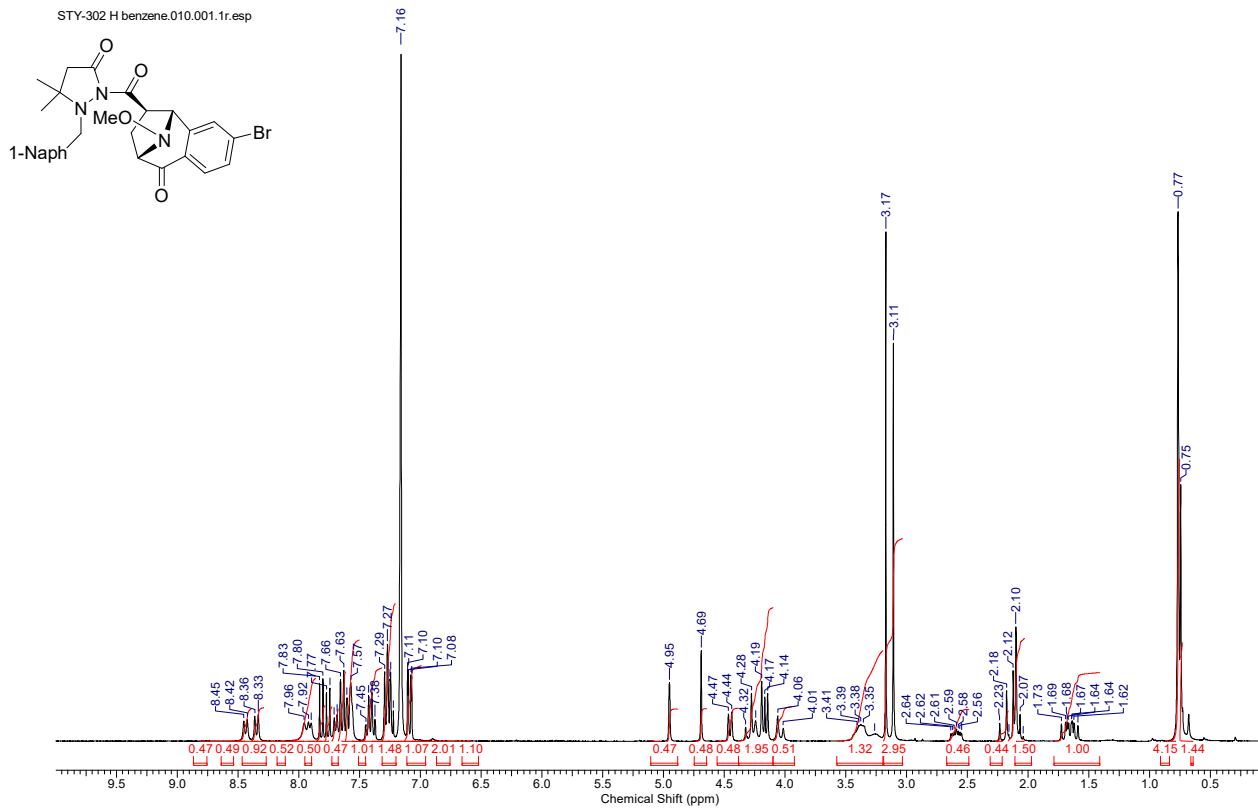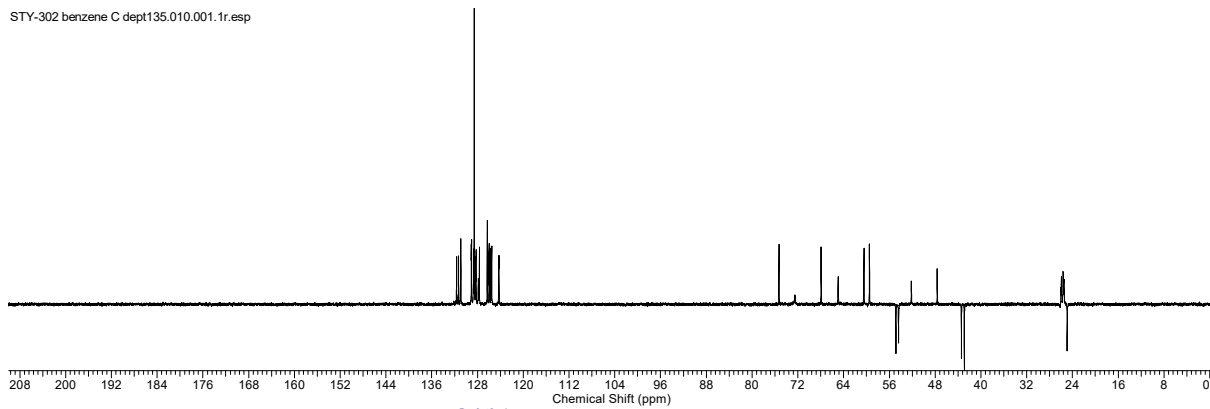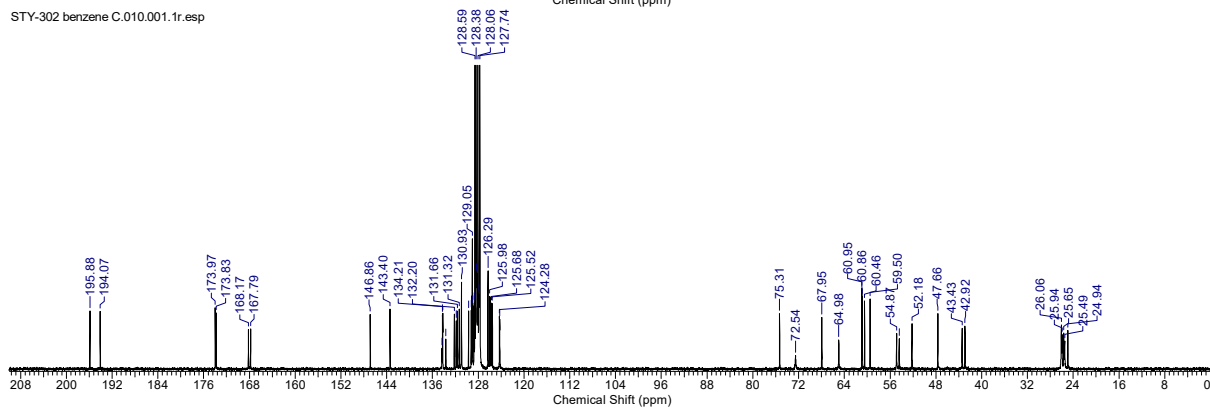

# $^1\text{H}$ and $^{13}\text{C}$ NMR of *exo*-3d

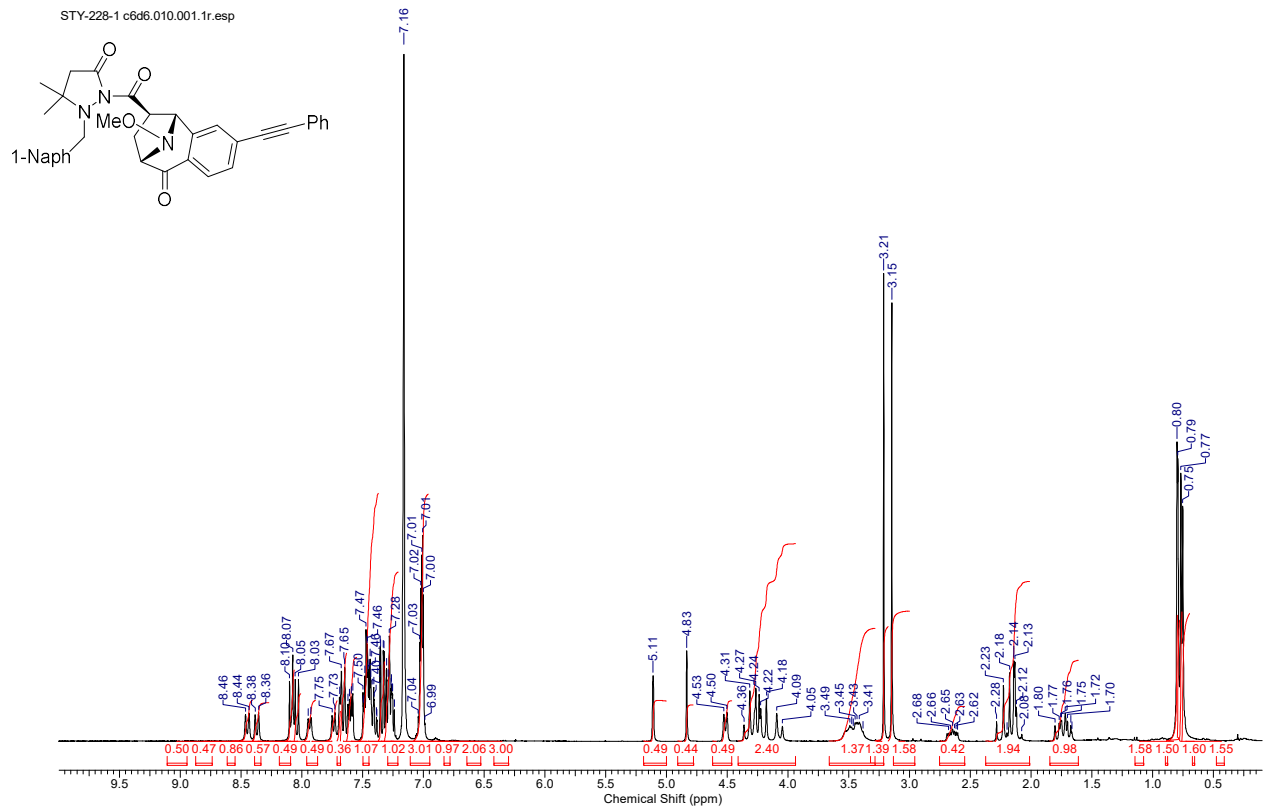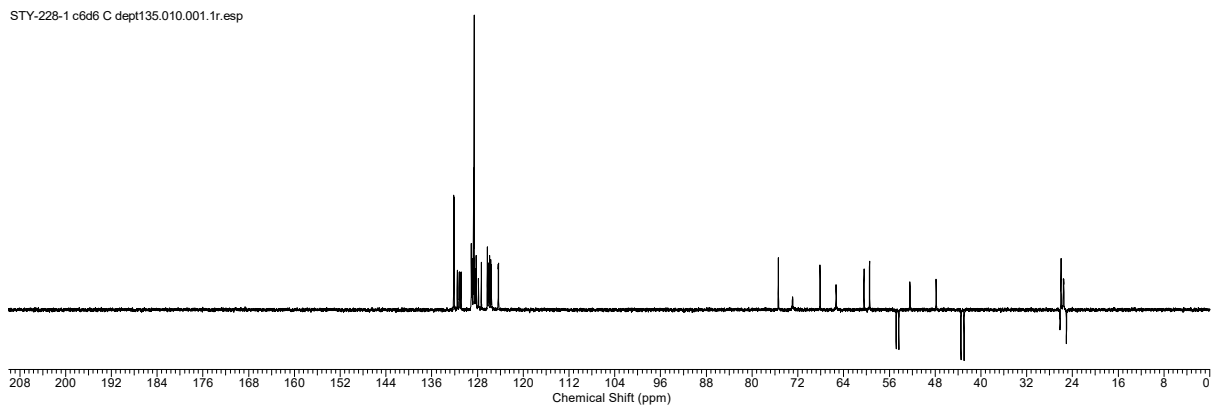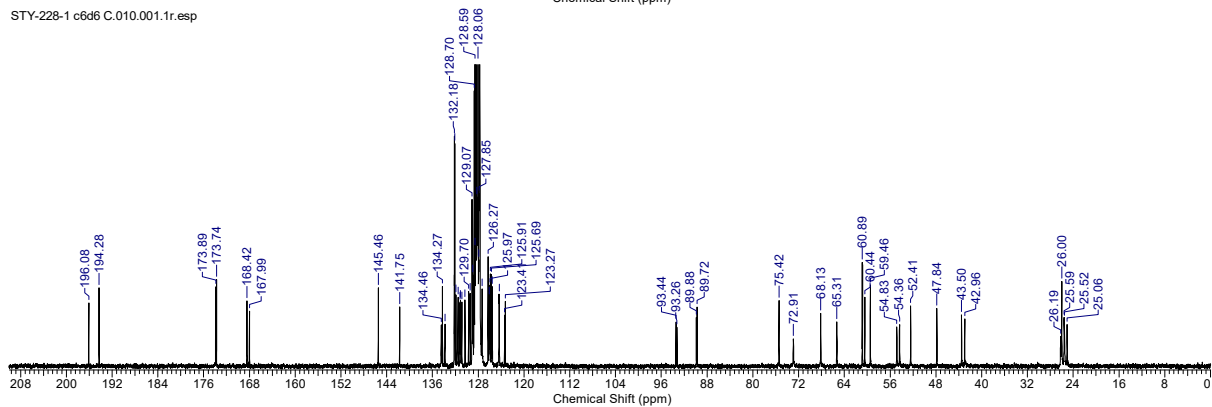

# $^1\text{H}$ and $^{13}\text{C}$ NMR of *exo-3e*

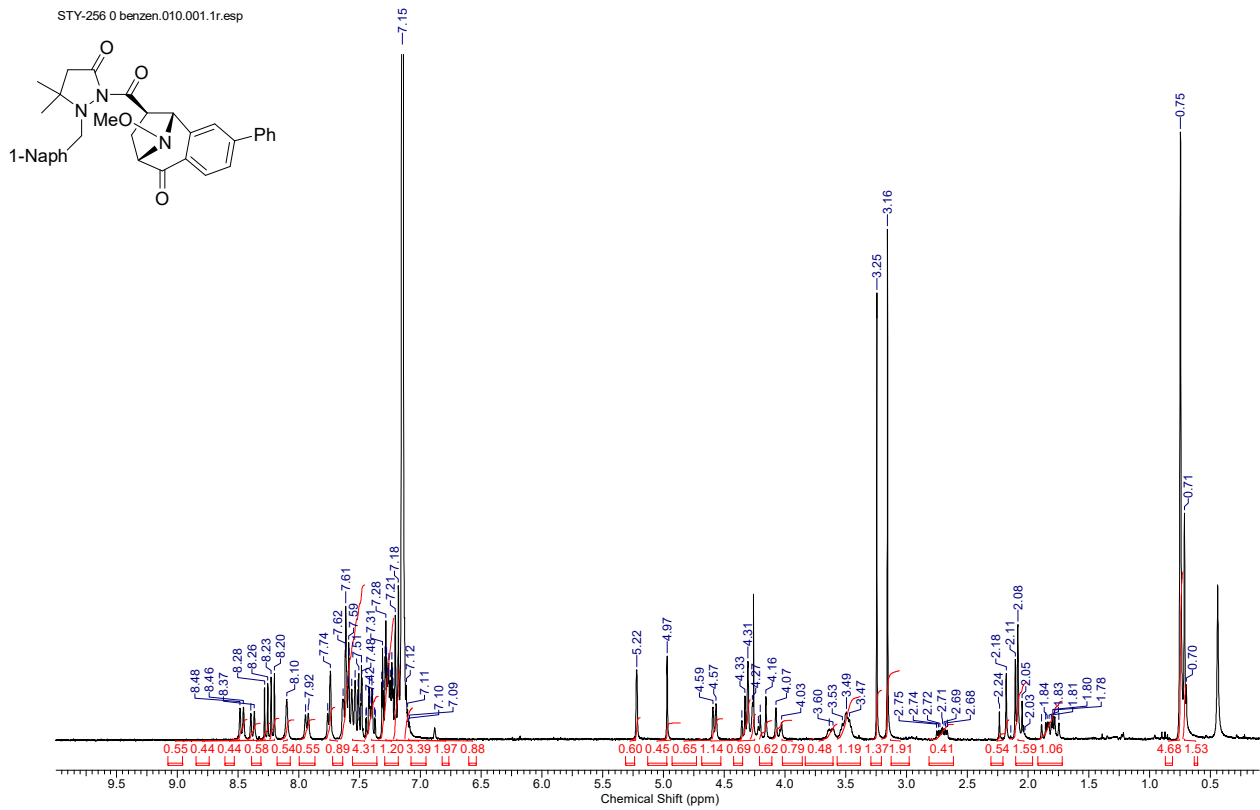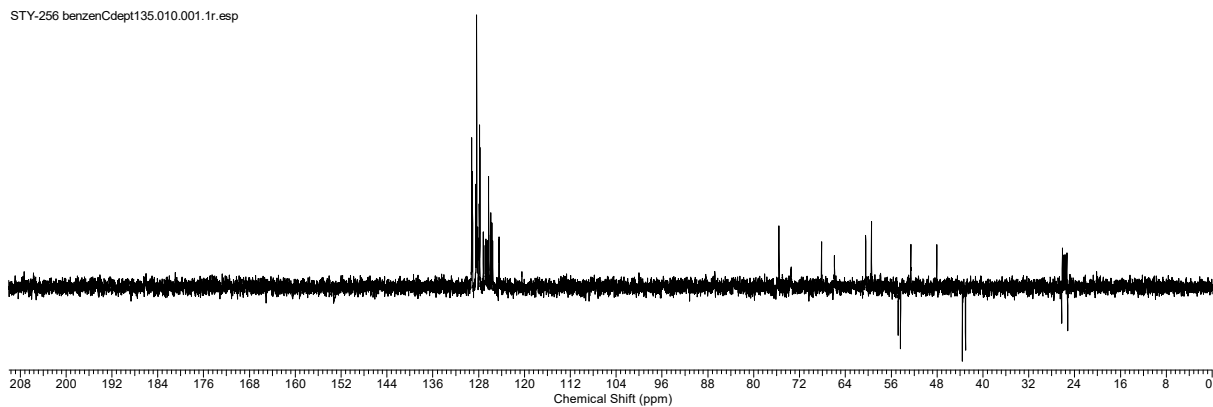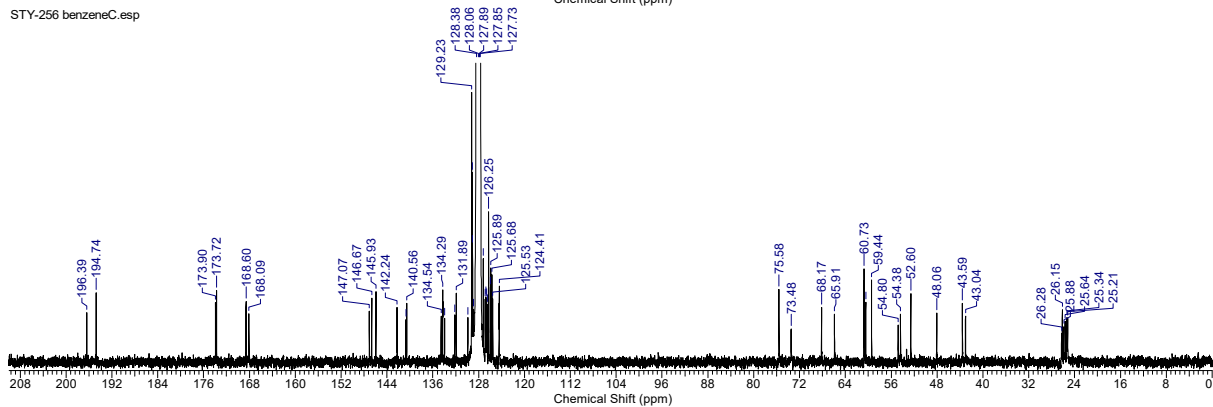

# $^1\text{H}$ and $^{13}\text{C}$ NMR of *exo*-3f

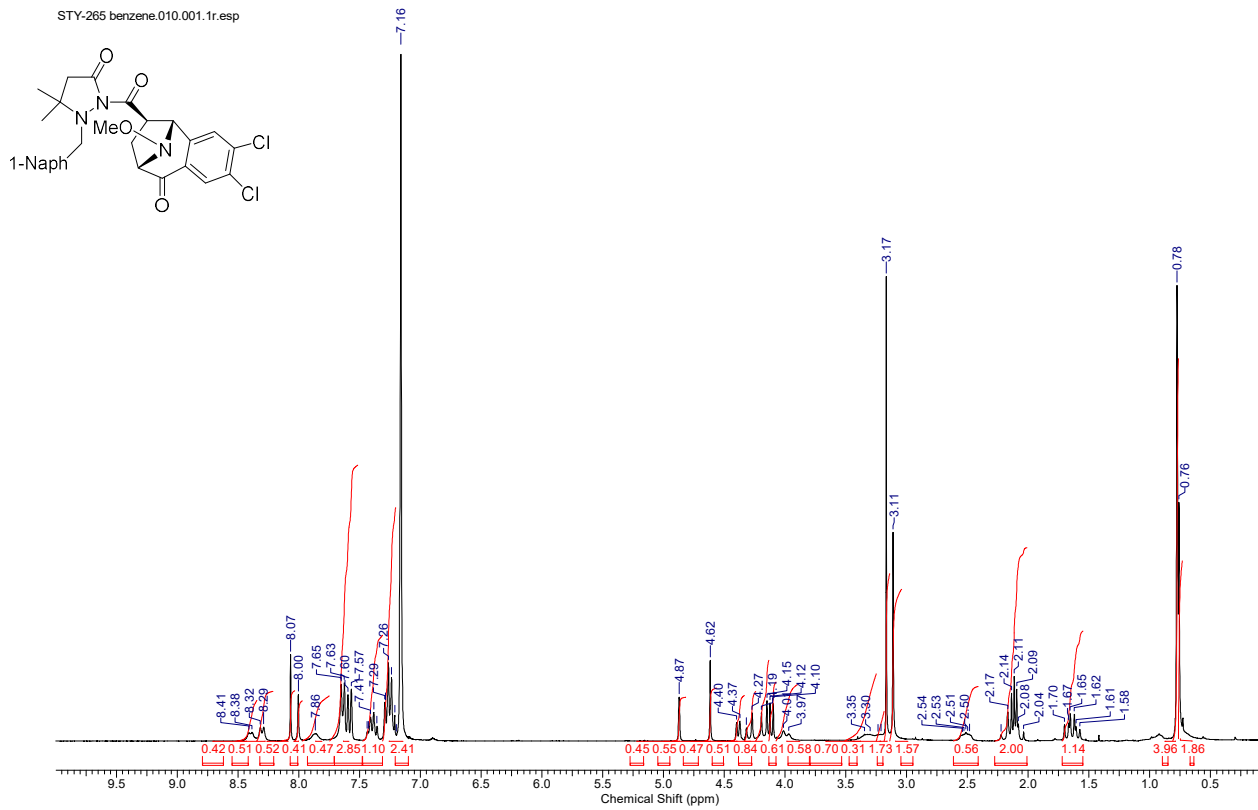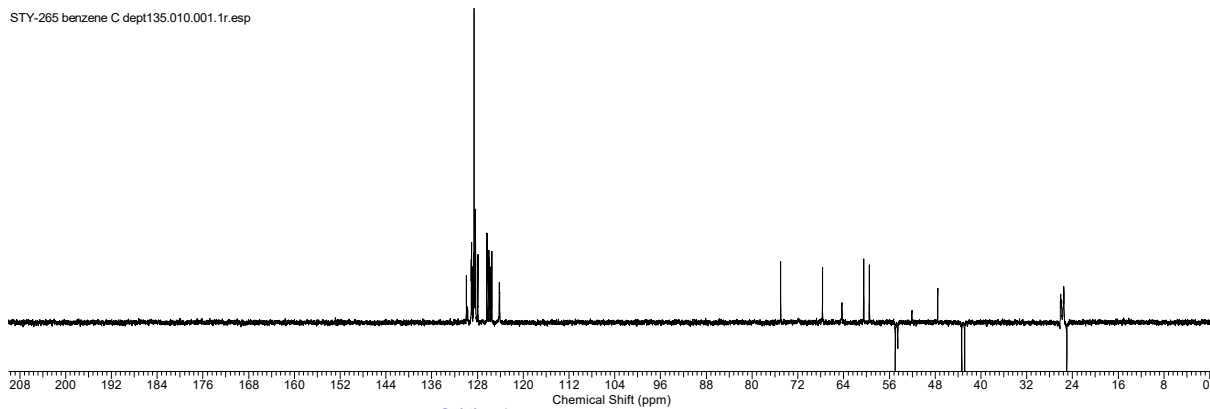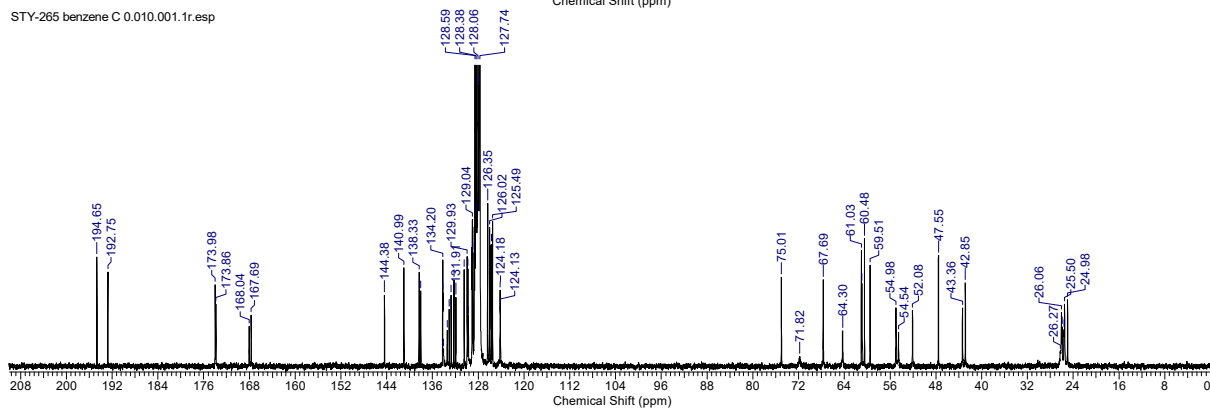

# $^1\text{H}$ and $^{13}\text{C}$ NMR of *exo*-3a

pyrazolidinone (exo).esp

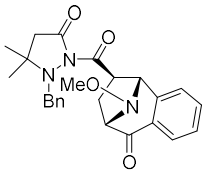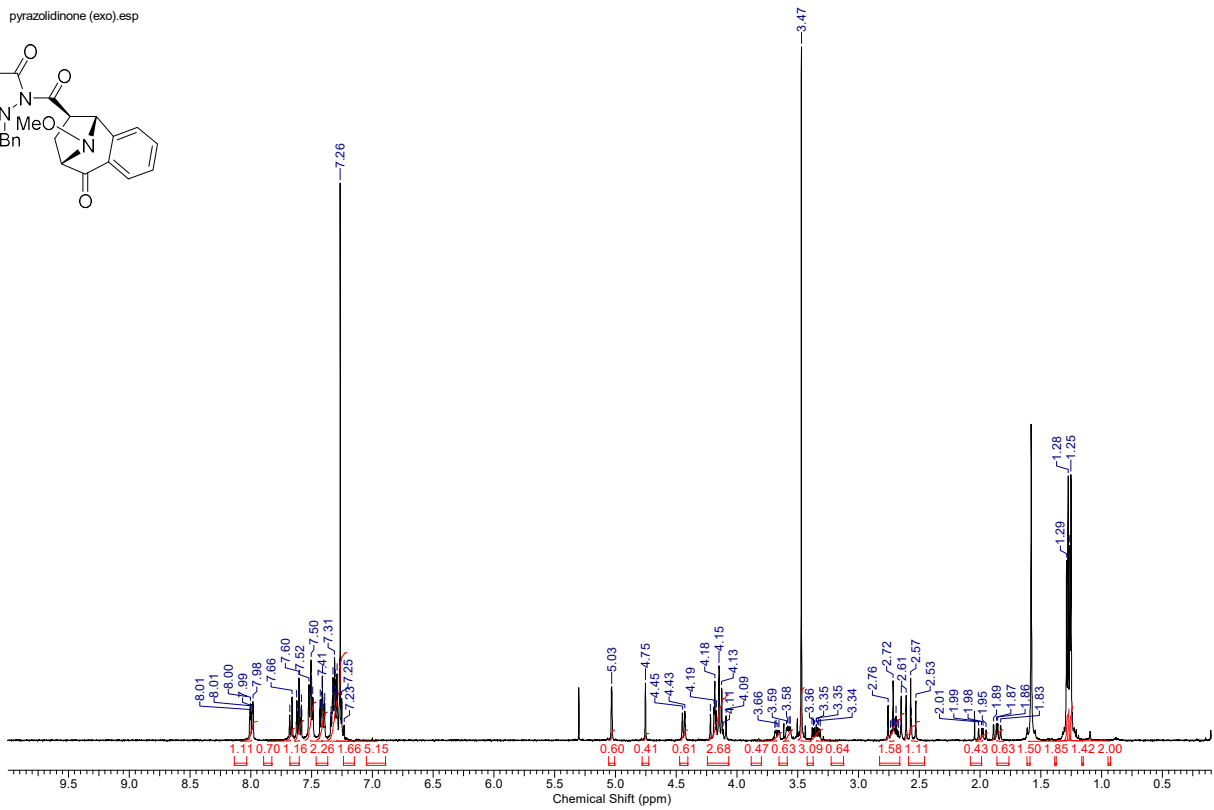

Auto1BCM\_E1\_FT.esp

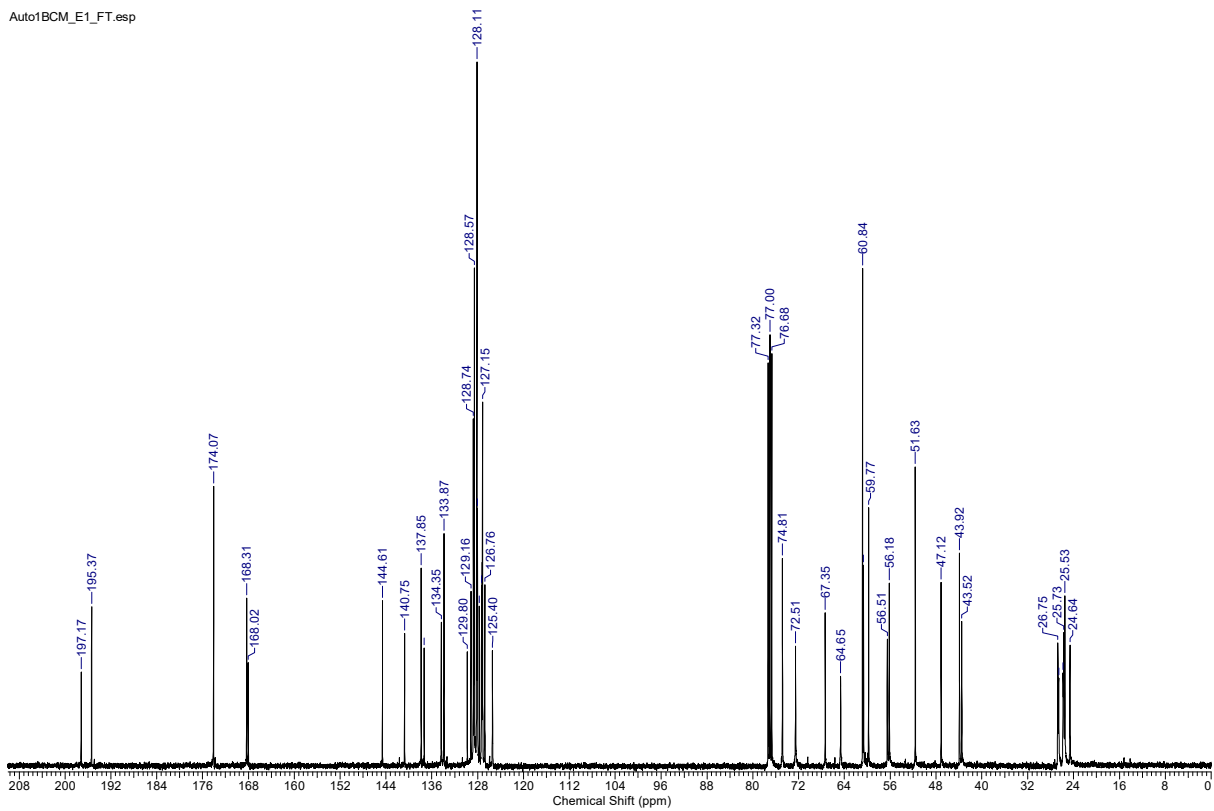



# $^1\text{H}$ and $^{13}\text{C}$ NMR of *endo*-5a

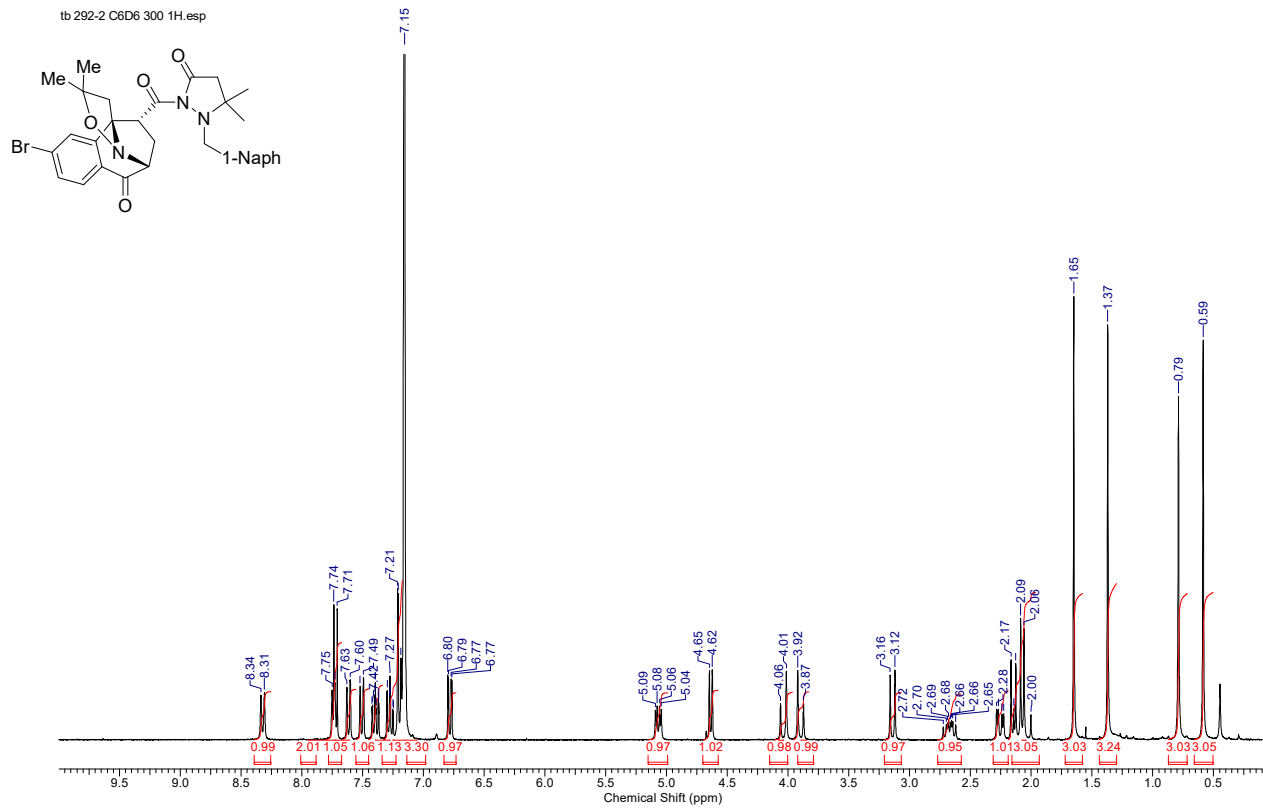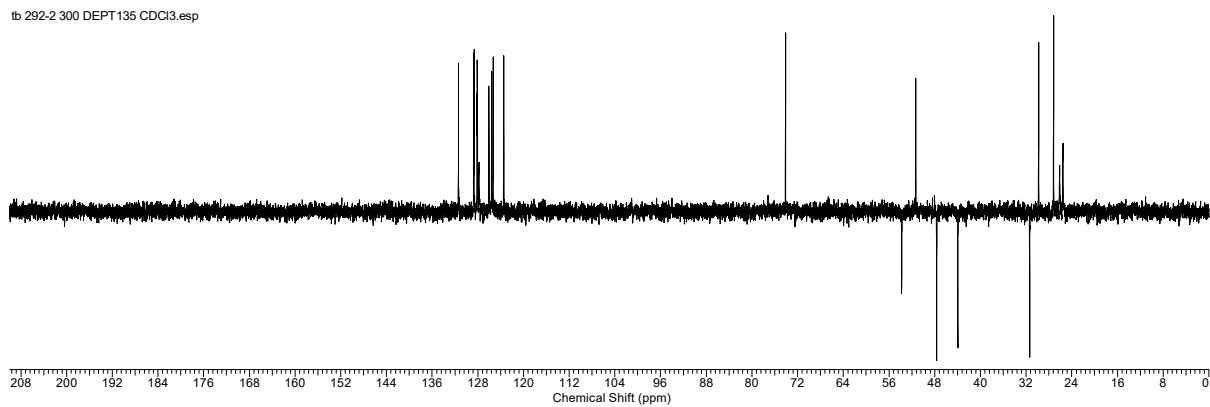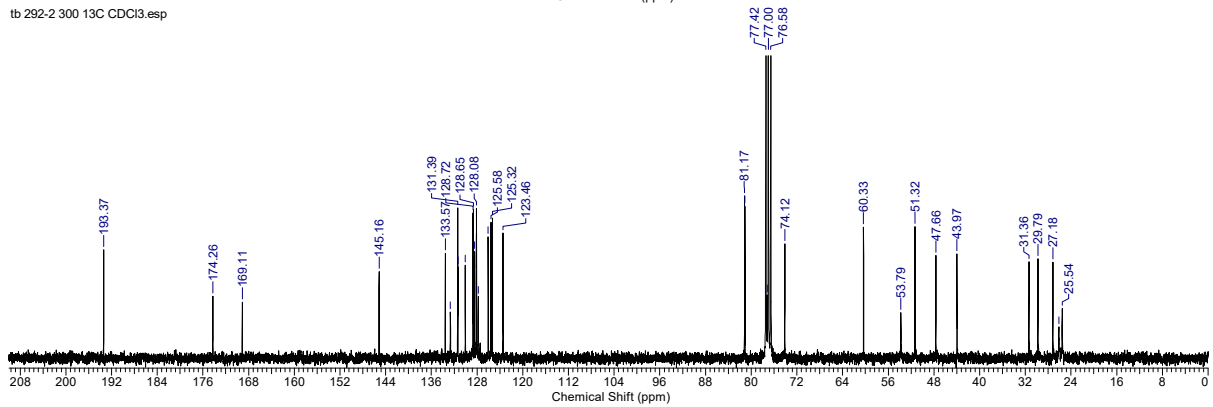



# $^1\text{H}$ and $^{13}\text{C}$ NMR of *endo*-5c

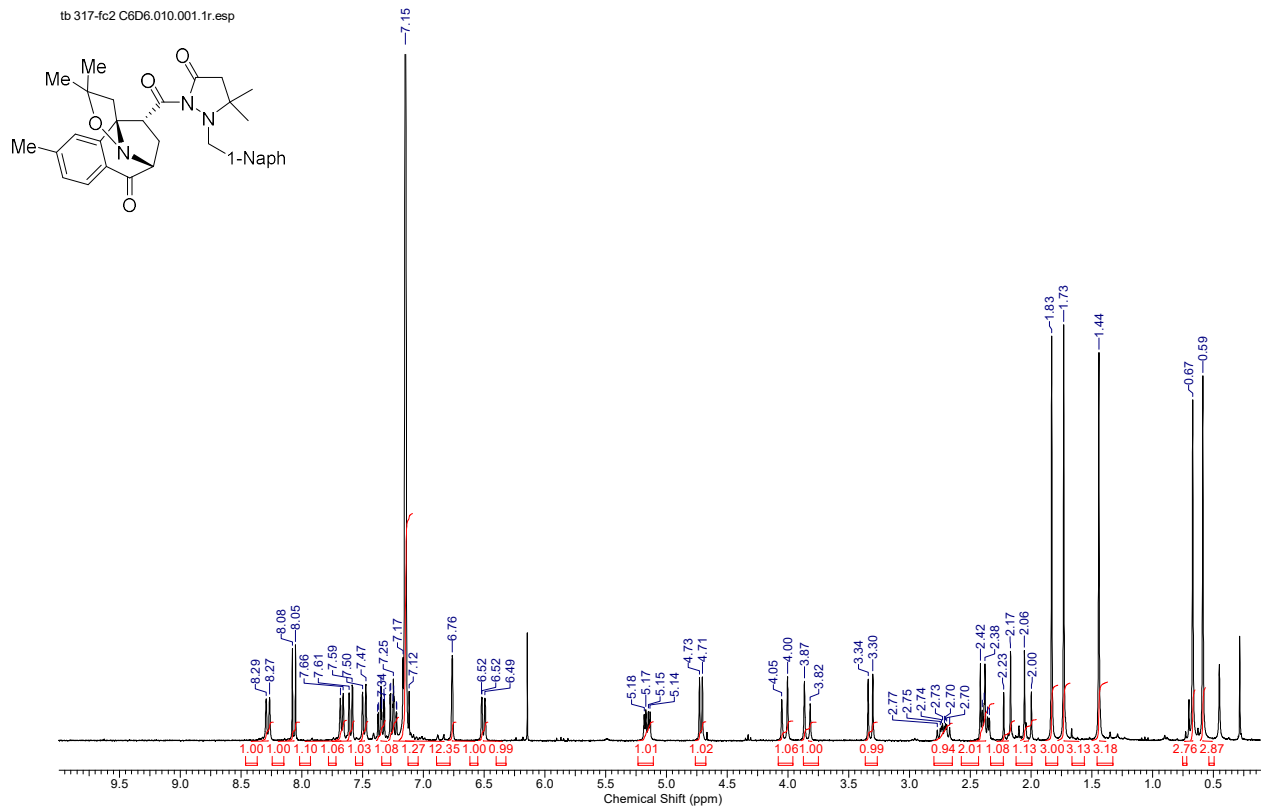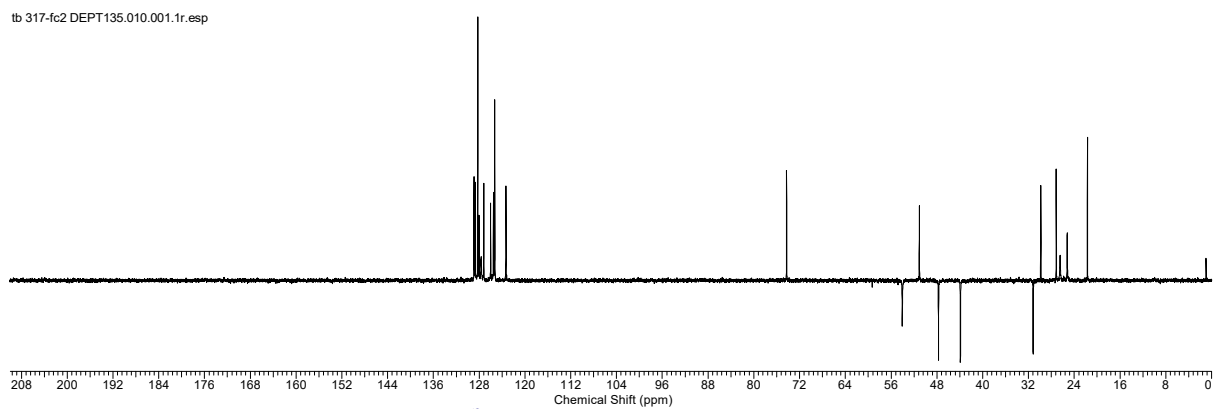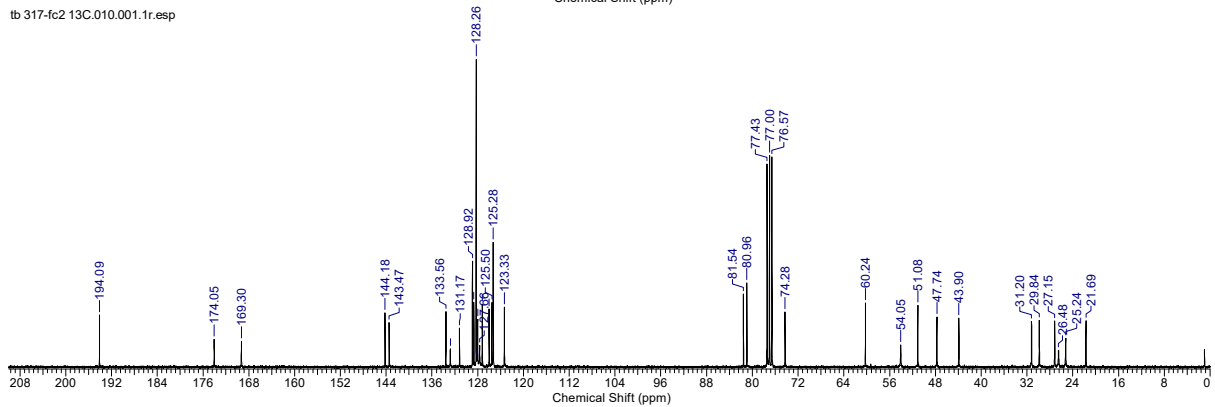



# $^1\text{H}$ and $^{13}\text{C}$ NMR of *endo*-5e

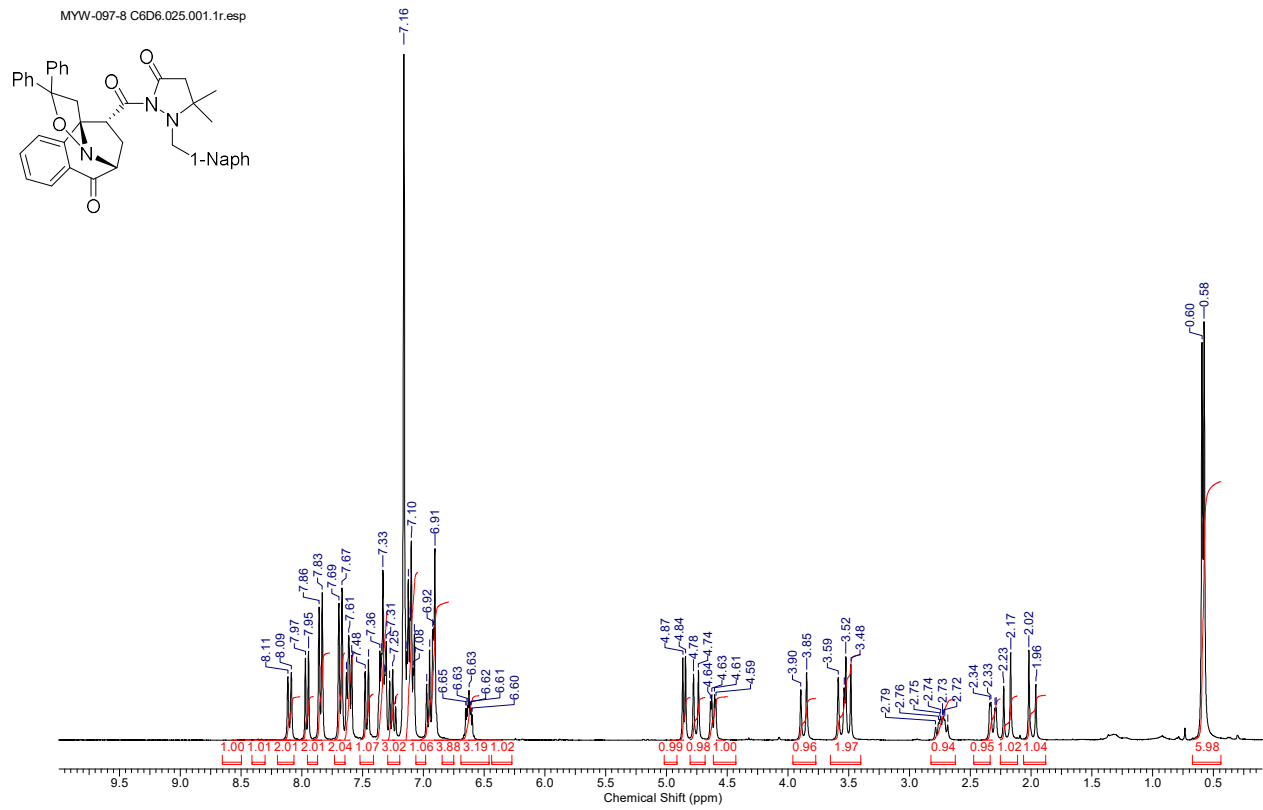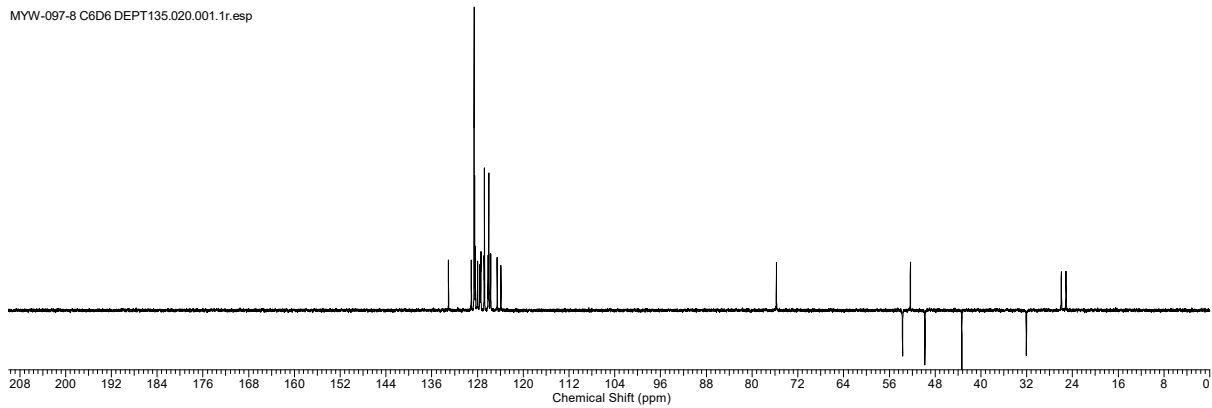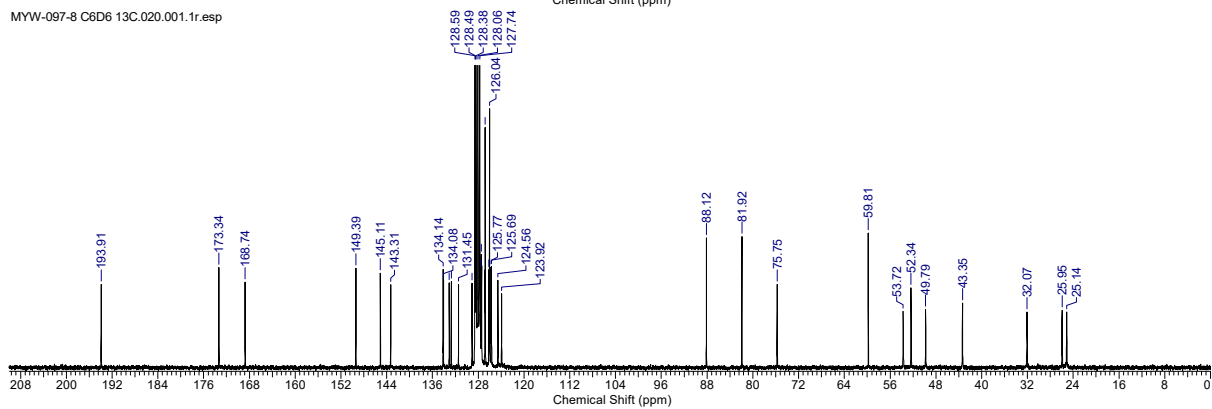

# $^1\text{H}$ and $^{13}\text{C}$ NMR of *endo*-5f

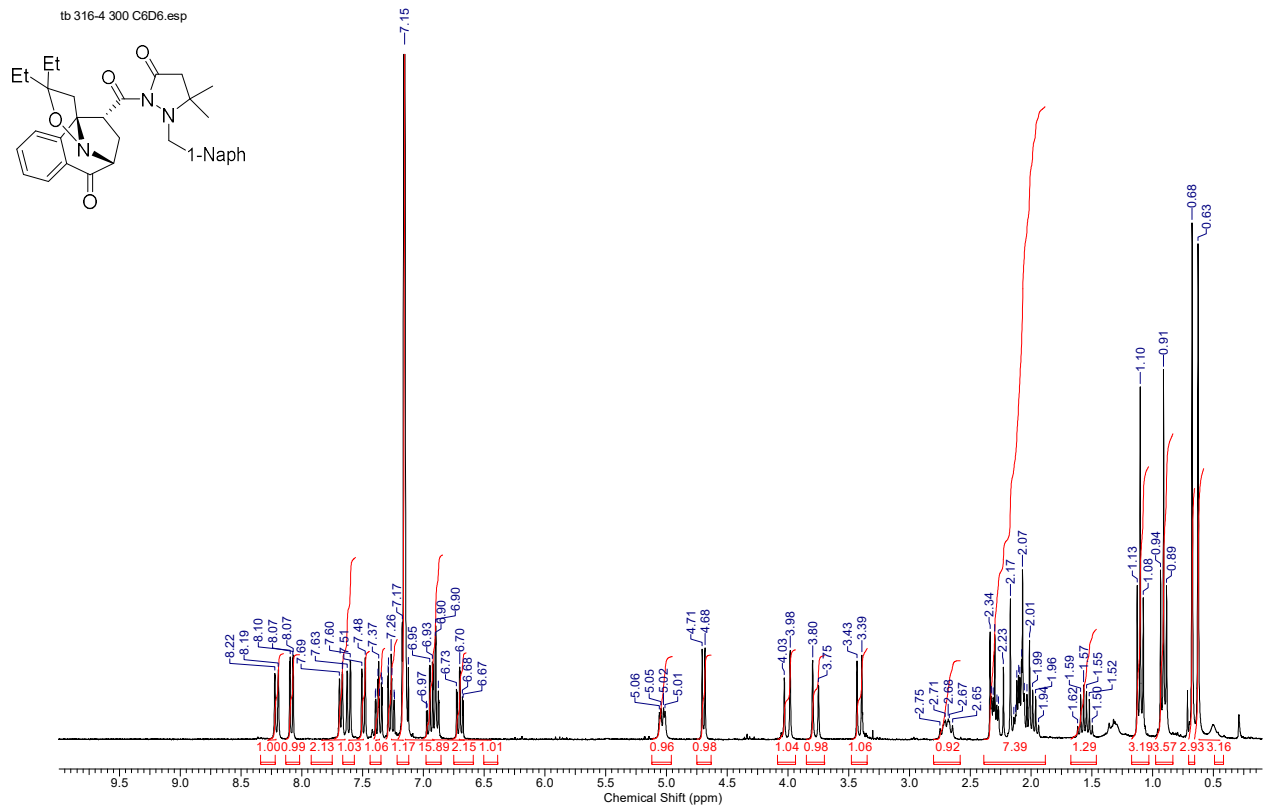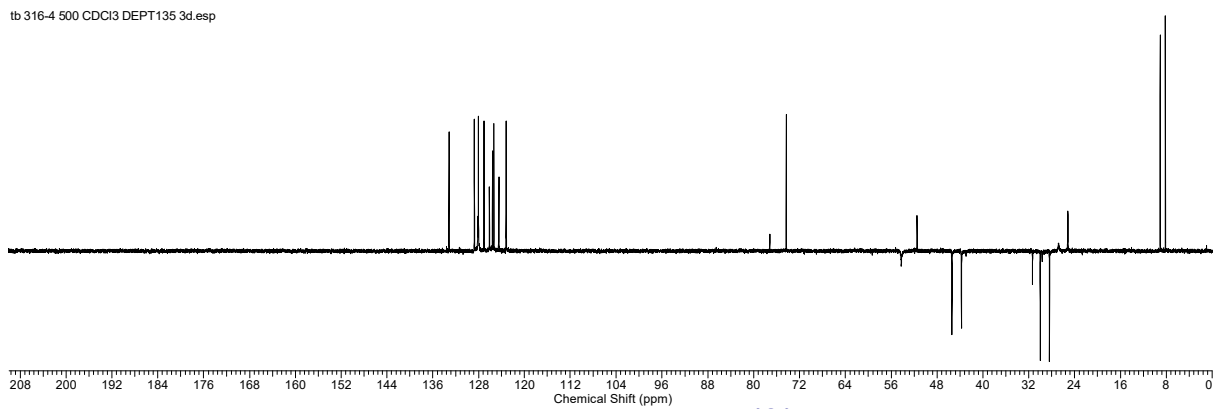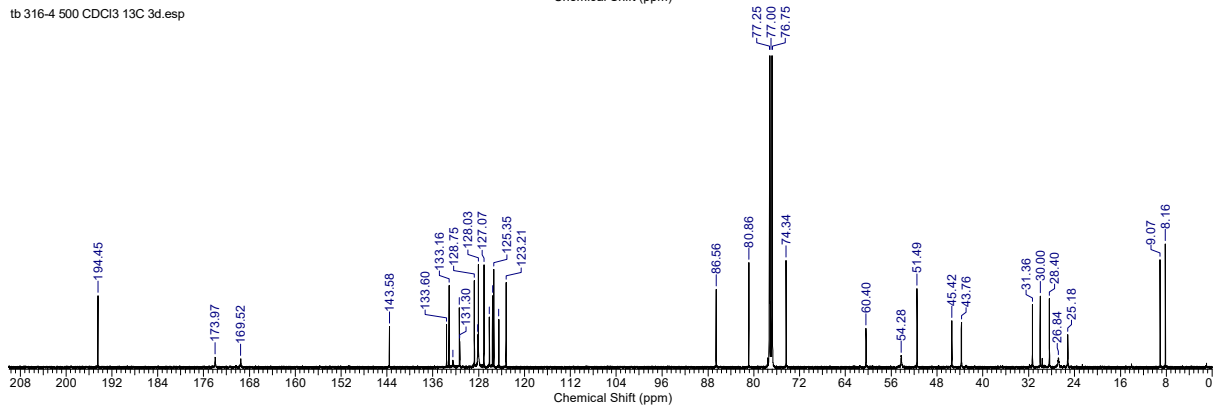

# $^1\text{H}$ and $^{13}\text{C}$ NMR of *endo*-5g

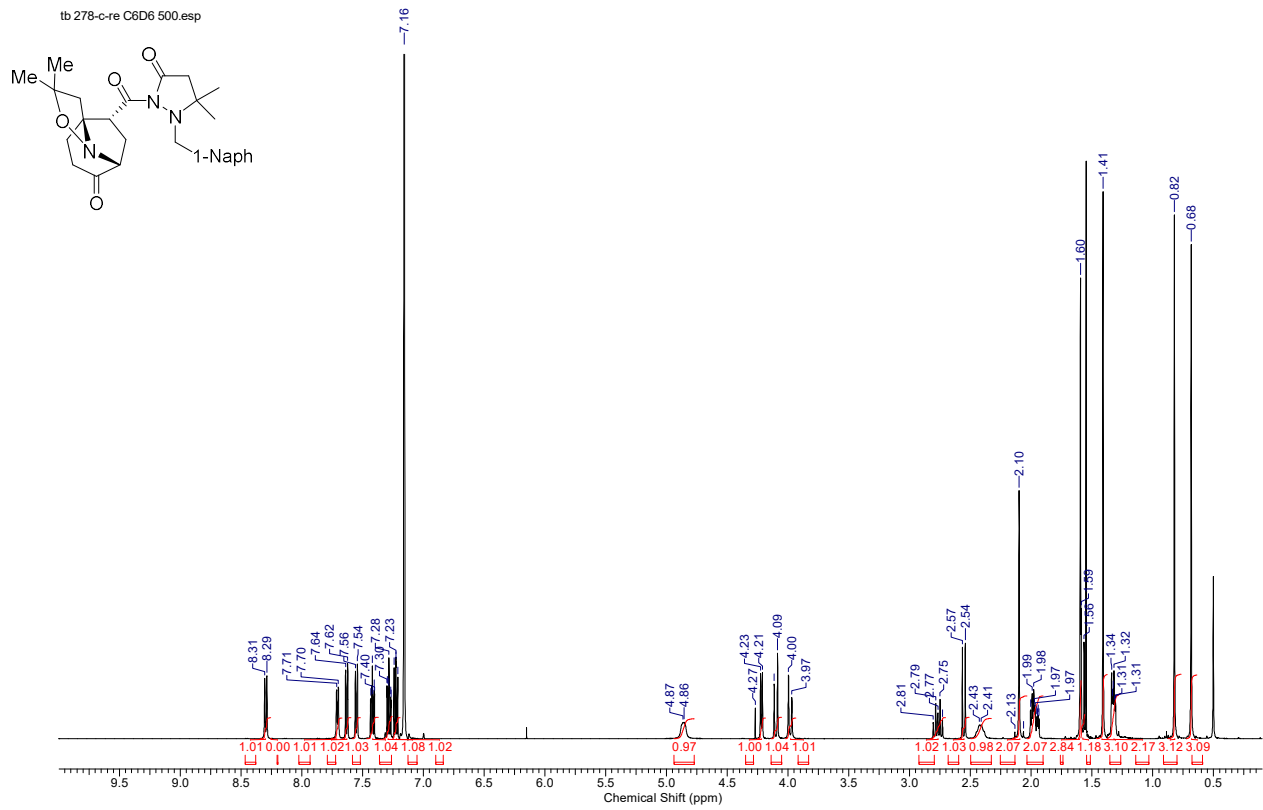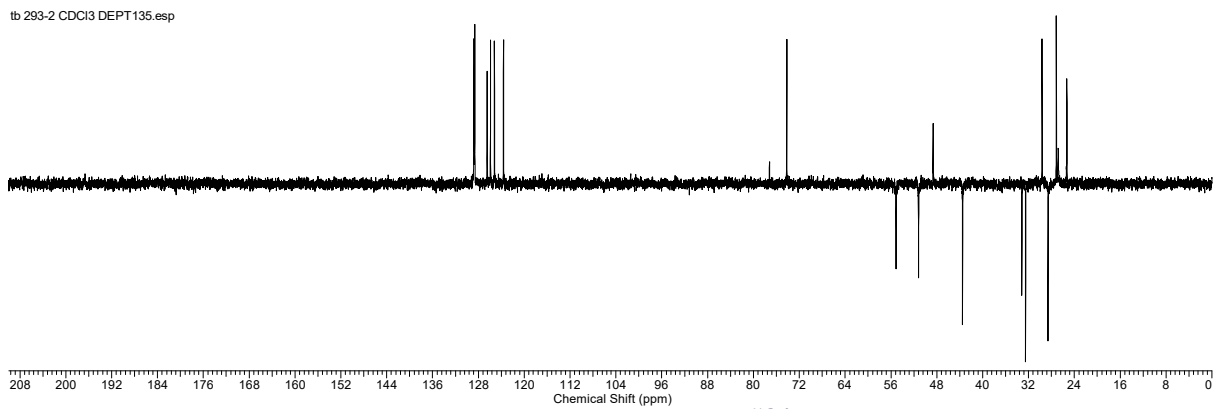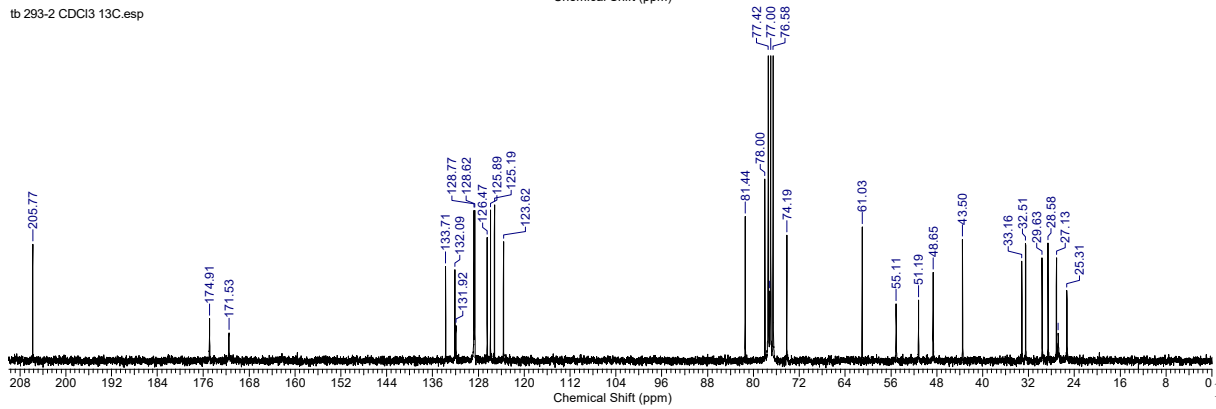

$^1\text{H}$  and

# <sup>13</sup>C NMR of 6

20160829 MeOD H.esp

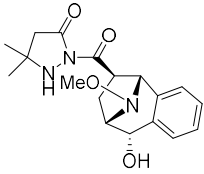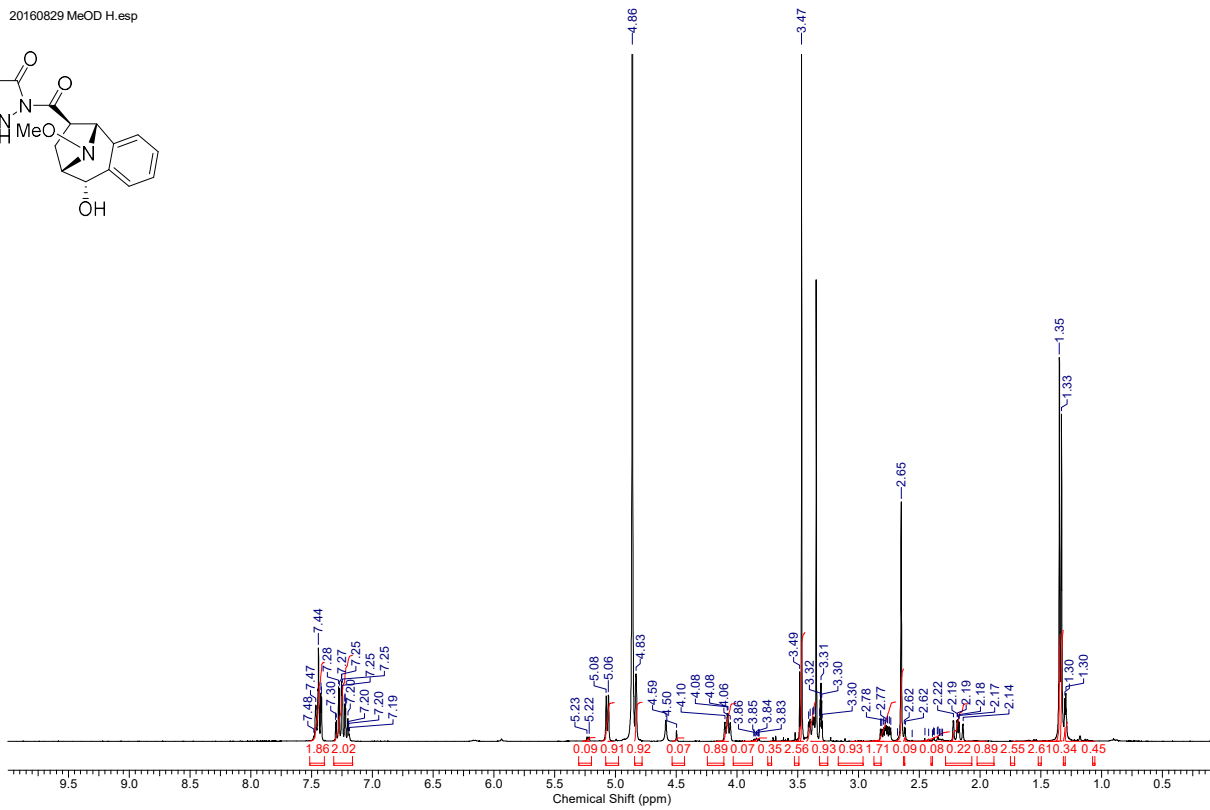

20160829 STY-273 dept135.MeOD.esp

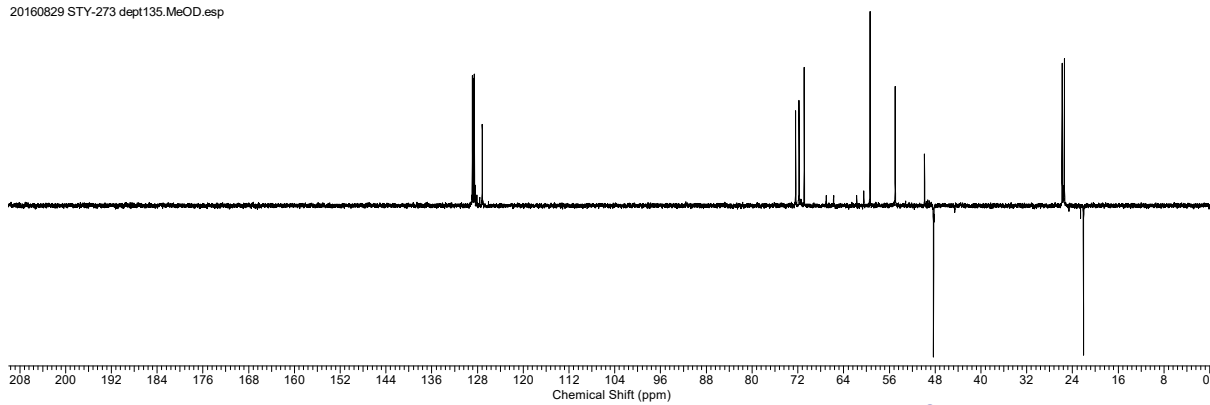

20160829 MeODI C.esp

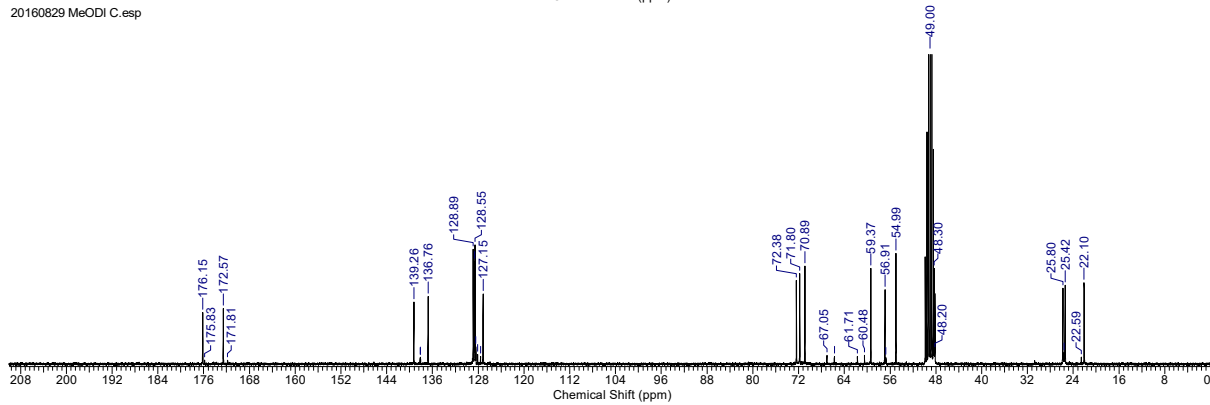



# $^1\text{H}$ and $^{13}\text{C}$ NMR of the alcohol obtained from *exo*-3e

STY-308 MoOD.010.001.1r.esp

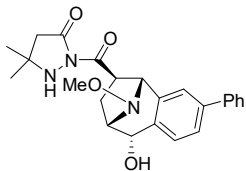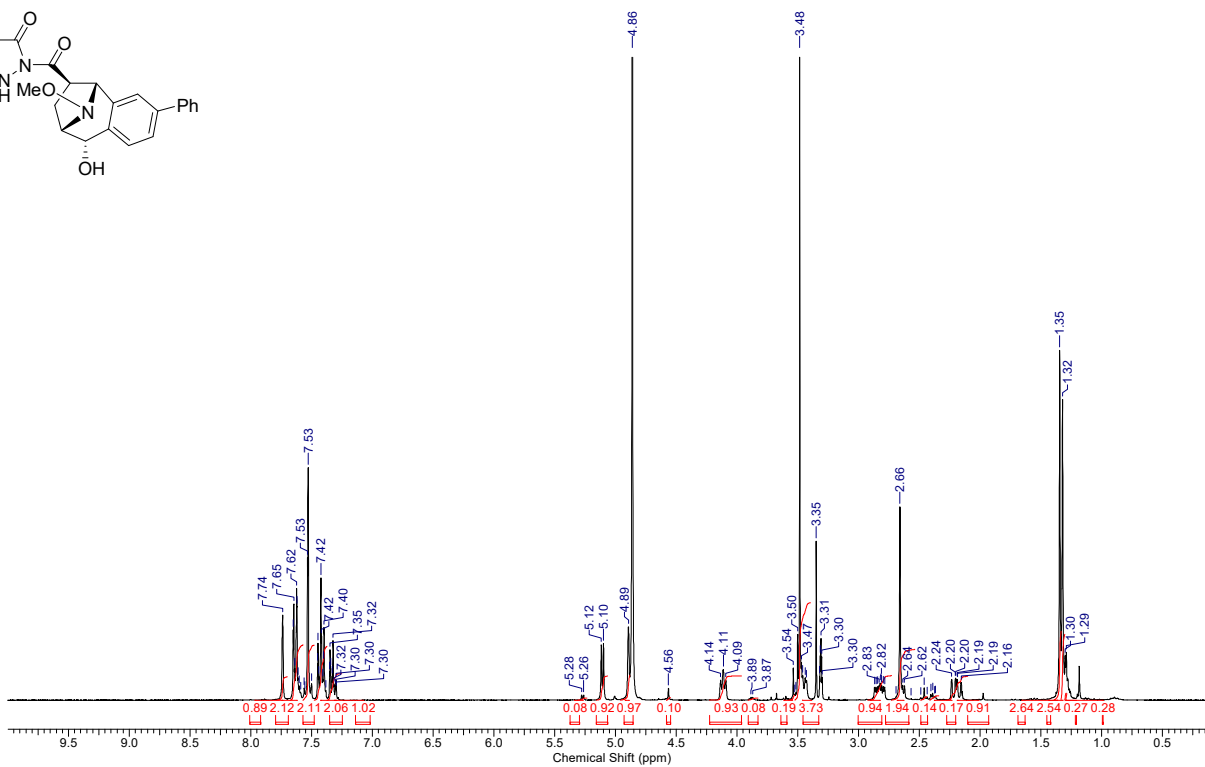

STY-308 MoODcdept135.010.001.1r.esp

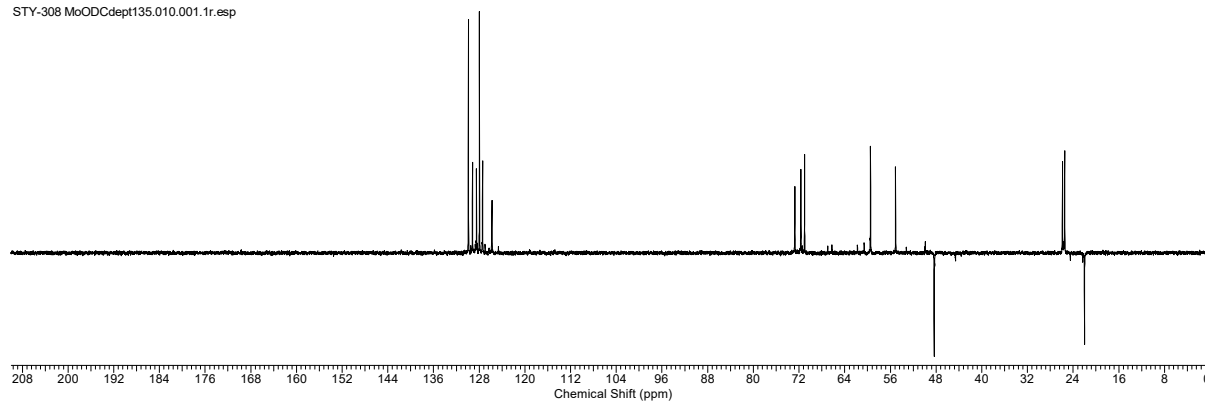

STY-308 MoODC.010.001.1r.esp

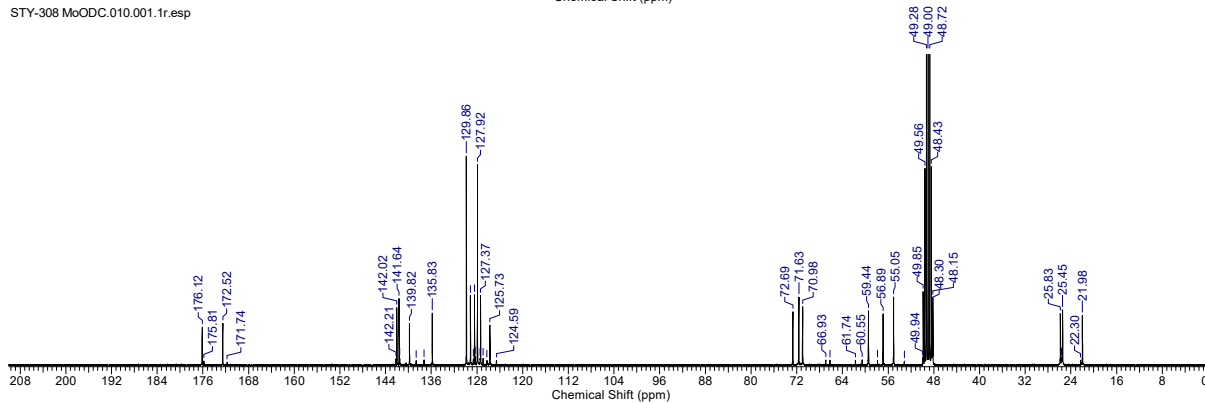

# <sup>1</sup>H and <sup>13</sup>C NMR of 7

STY-296 1-3 benzene.010.001.1r.esp

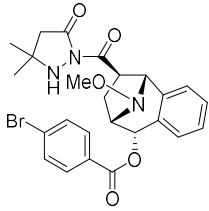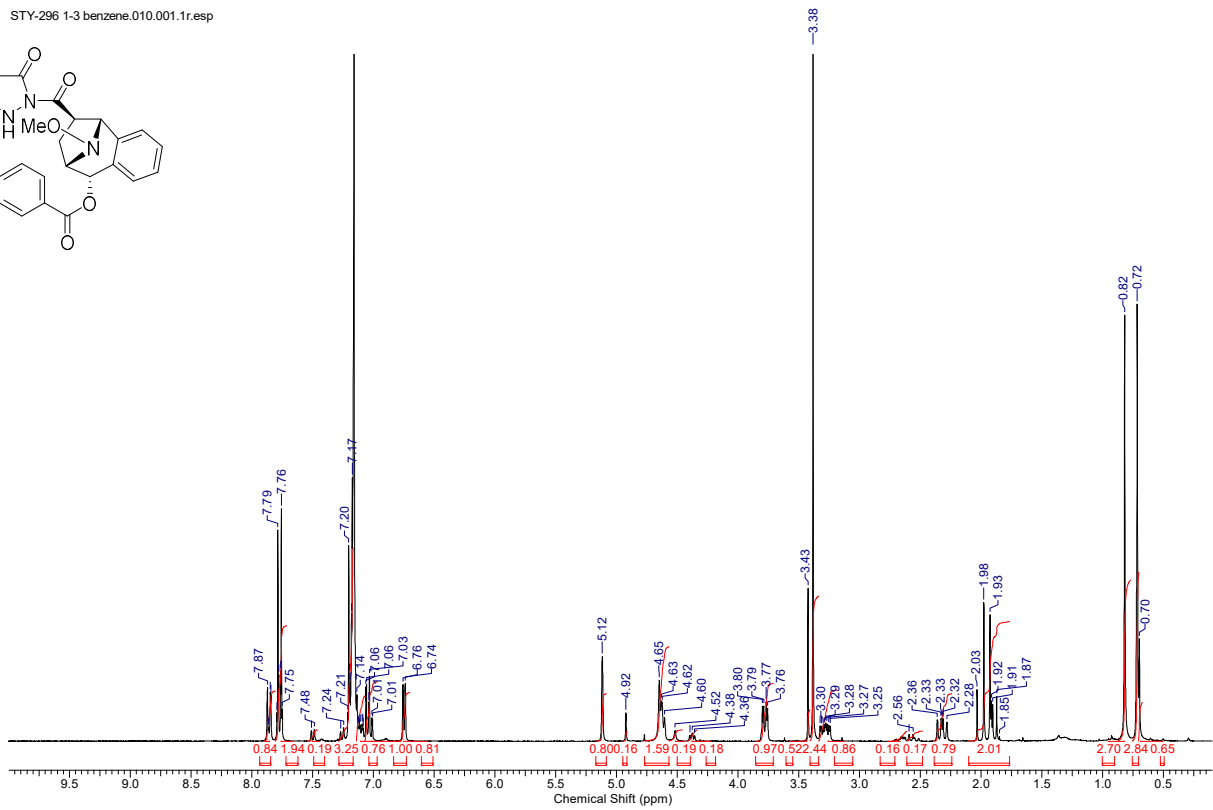

STY-296 1-3 benzene C.dept135.010.001.1r.esp

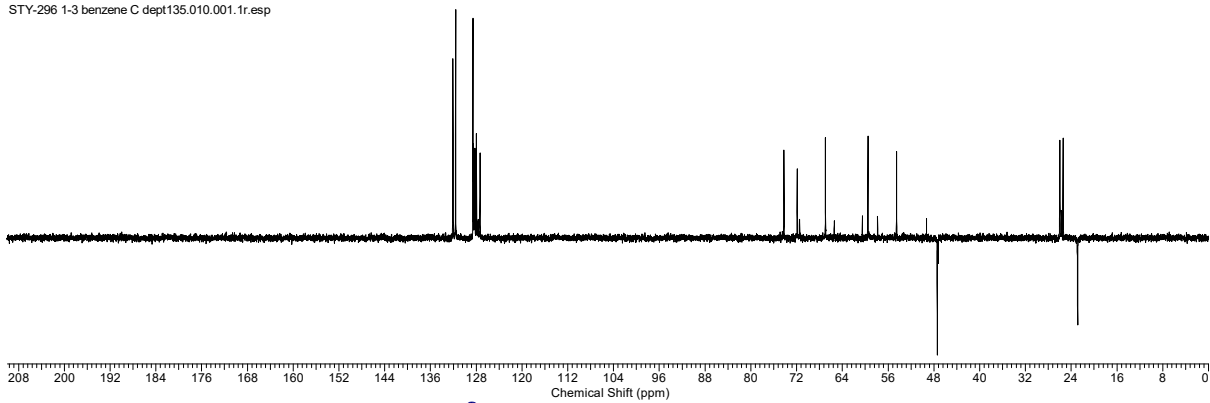

STY-296 1-3 benzene C.010.001.1r.esp

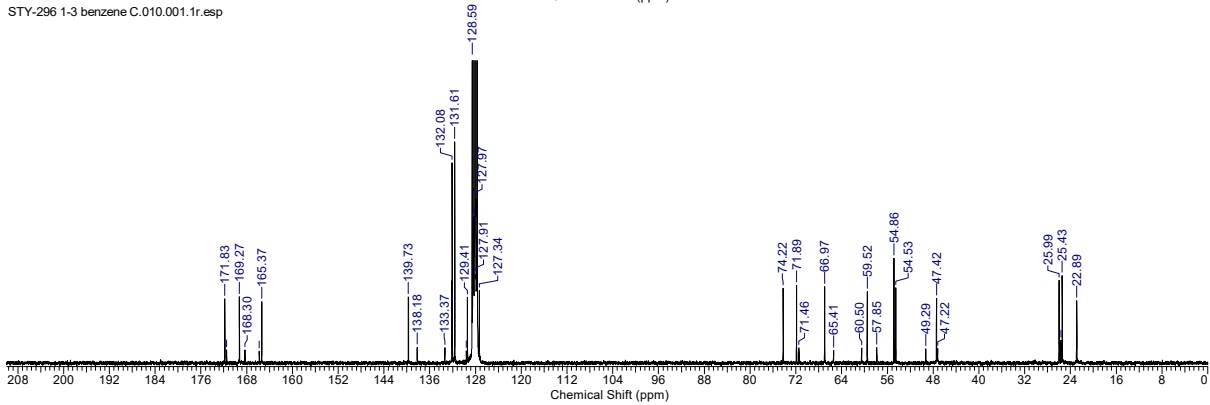

# <sup>1</sup>H and <sup>13</sup>C NMR of S4

MYW-072 C6D6.010.001.1r.esp

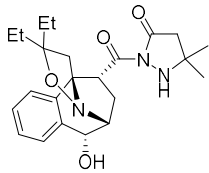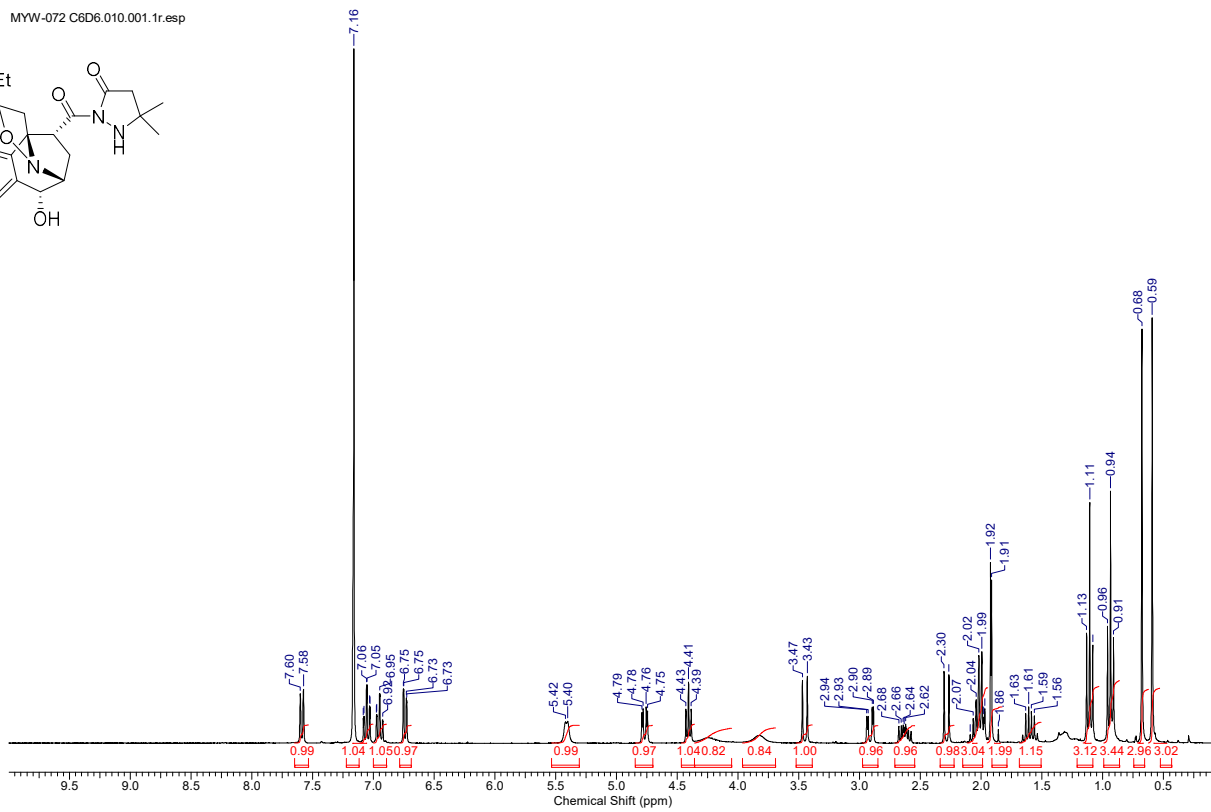

MYW-072 C6D6 DEPT135.020.001.1r.esp

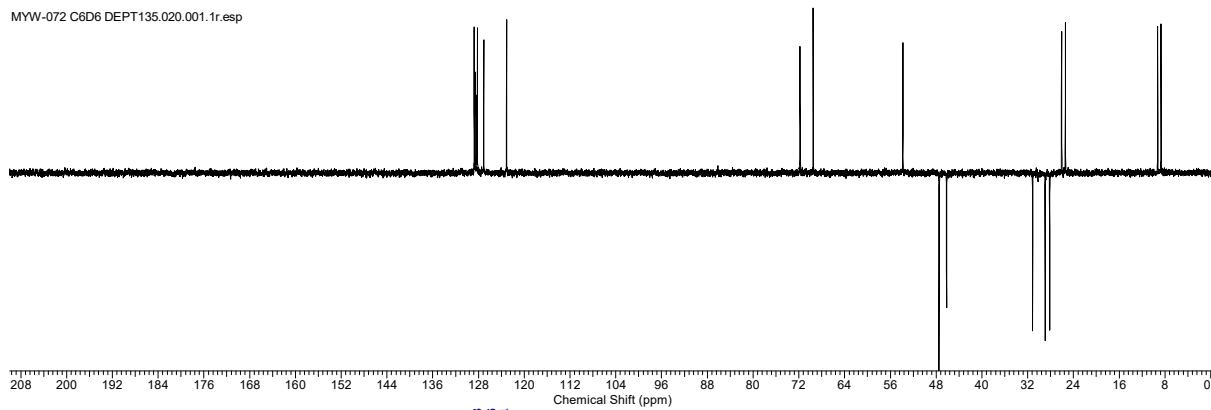

MYW-072 C6D6 13C.020.001.1r.esp

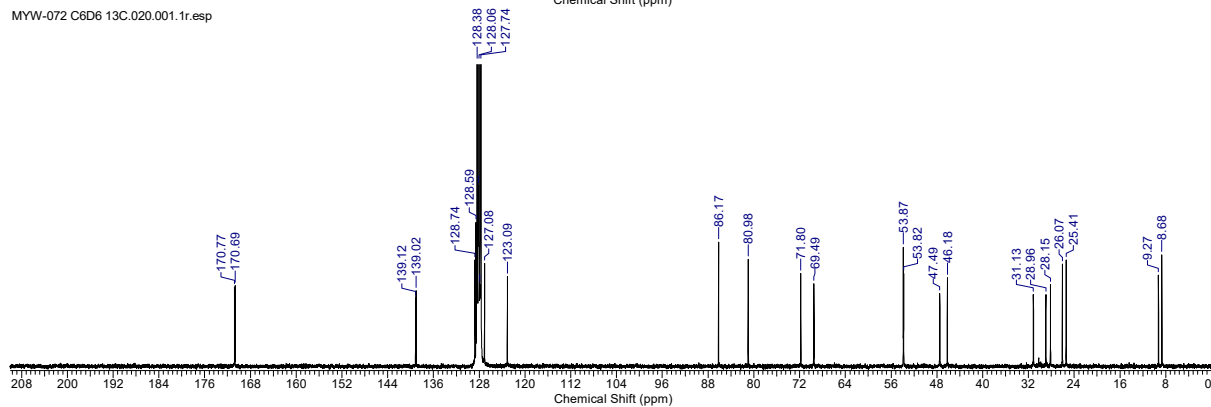

# $^1\text{H}$ and $^{13}\text{C}$ NMR of **1b**

STY-.010.001.1r.esp

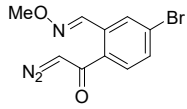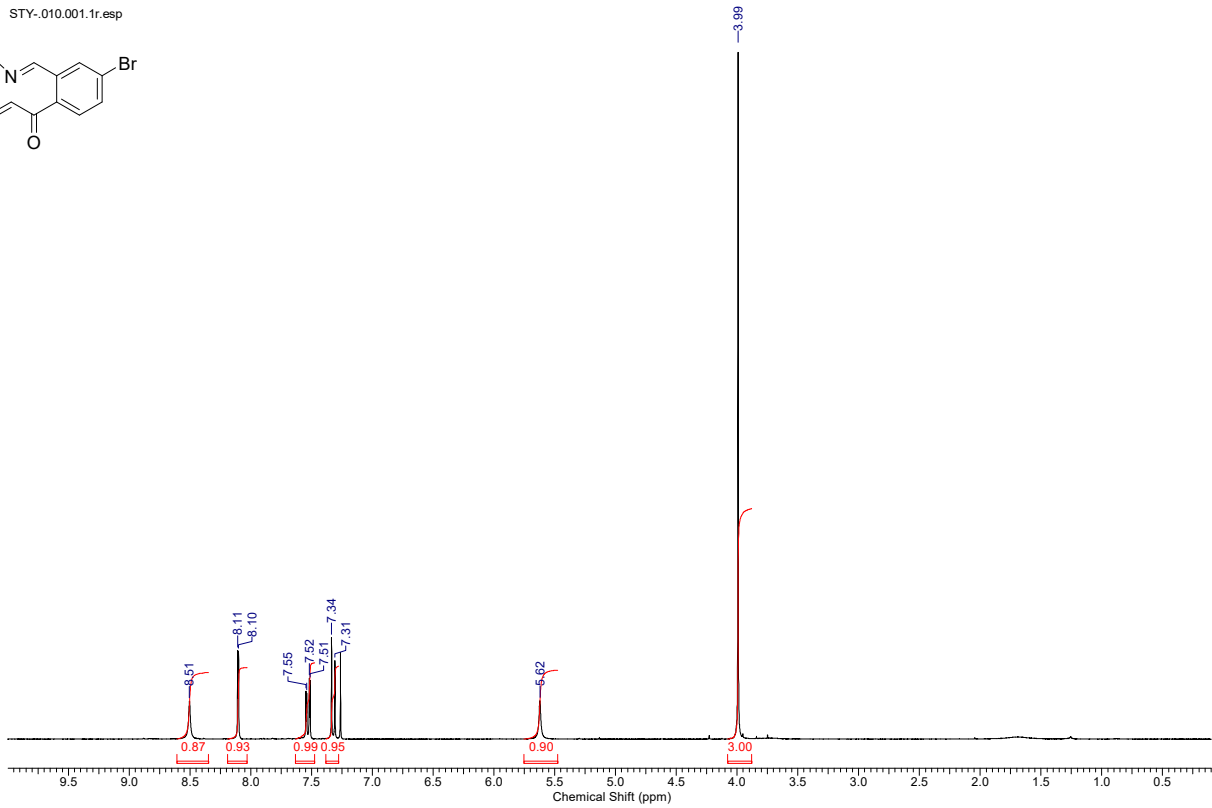

br-diazo C dept135.010.001.1r.esp

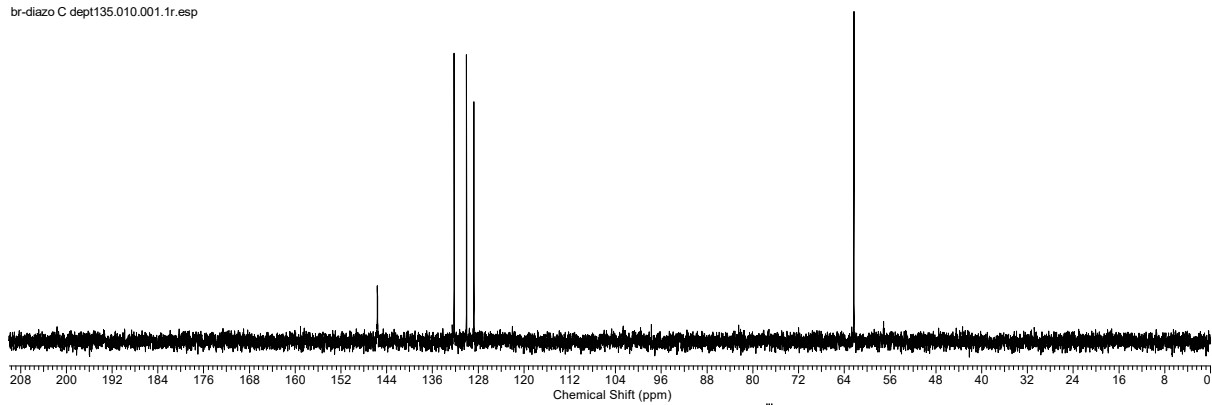

br-diazo C.010.001.1r.esp

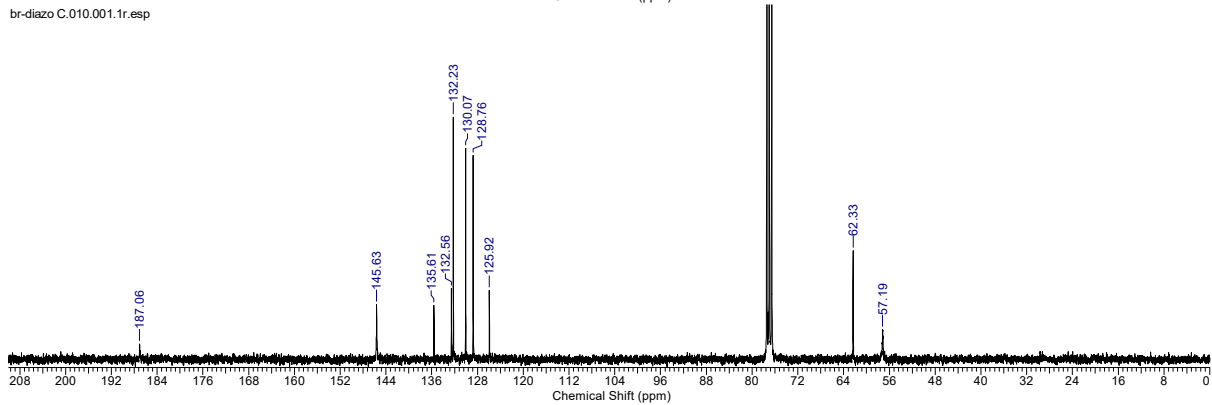

# <sup>1</sup>H and <sup>13</sup>C NMR of 1c

STY-218 1.010.001.1r.esp

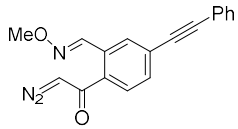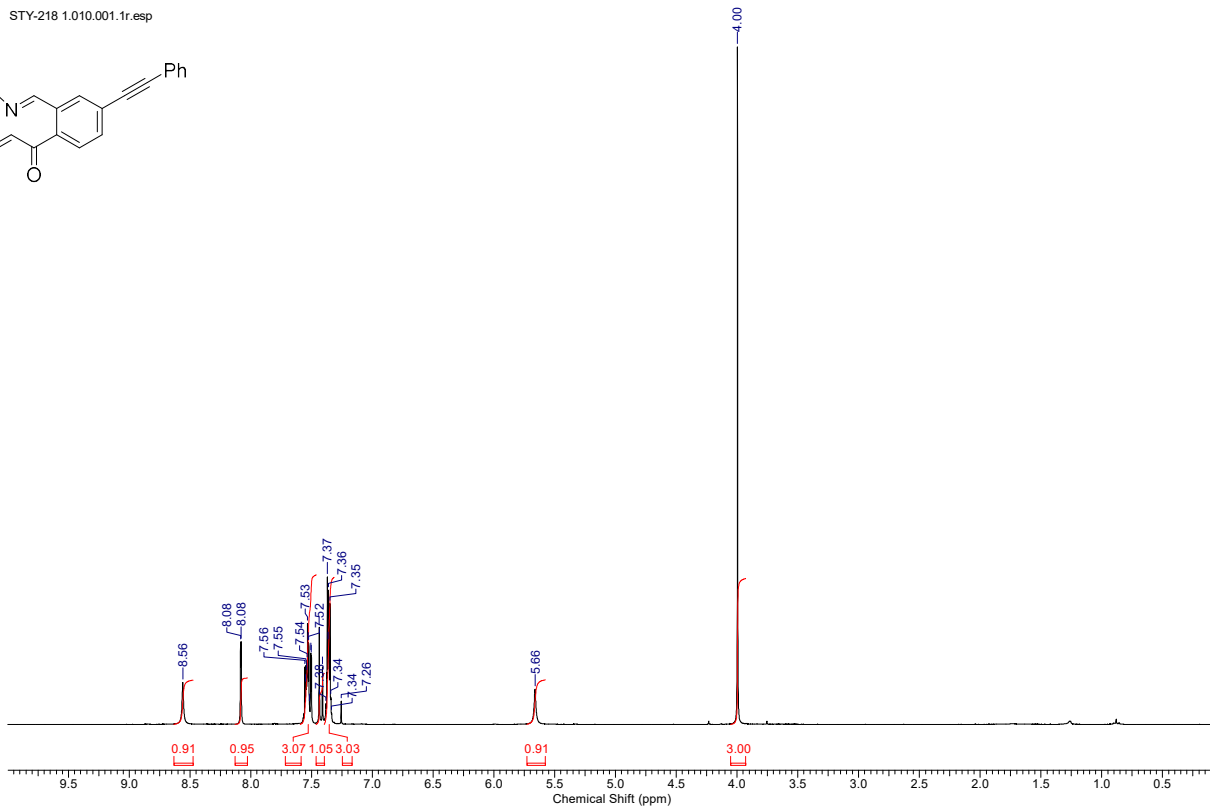

STY-218 1Cdept135.014.001.1r.esp

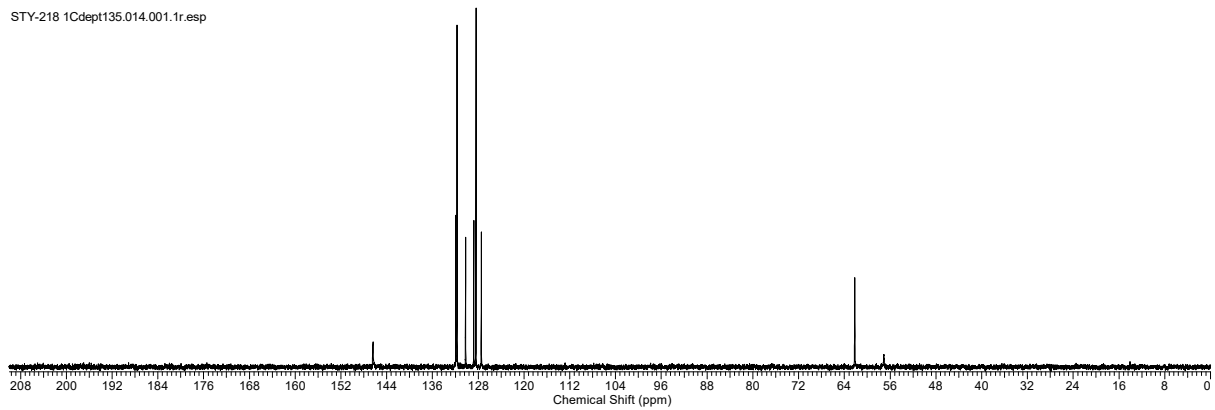

STY-218 1C.011.001.1r.esp

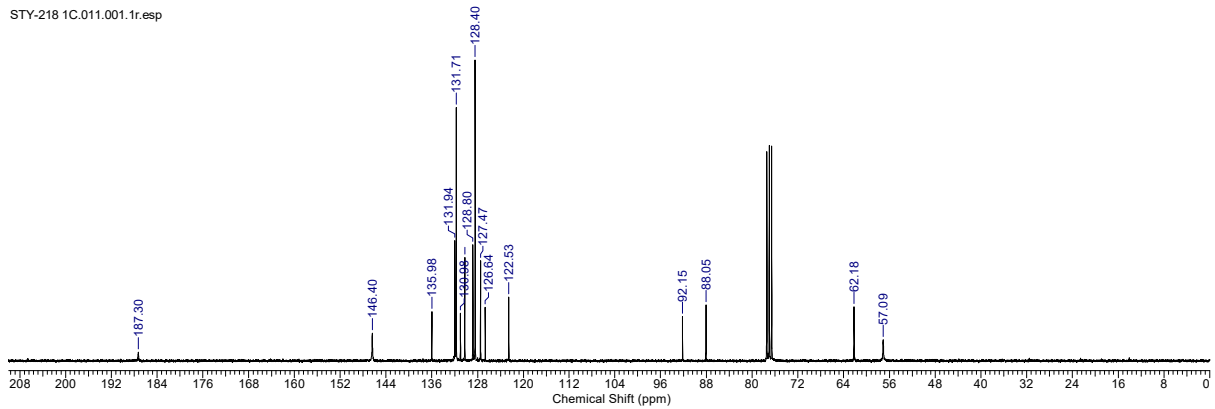

# $^1\text{H}$ and $^{13}\text{C}$ NMR of **1d**

STY-240 01.010.001.1r.esp

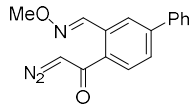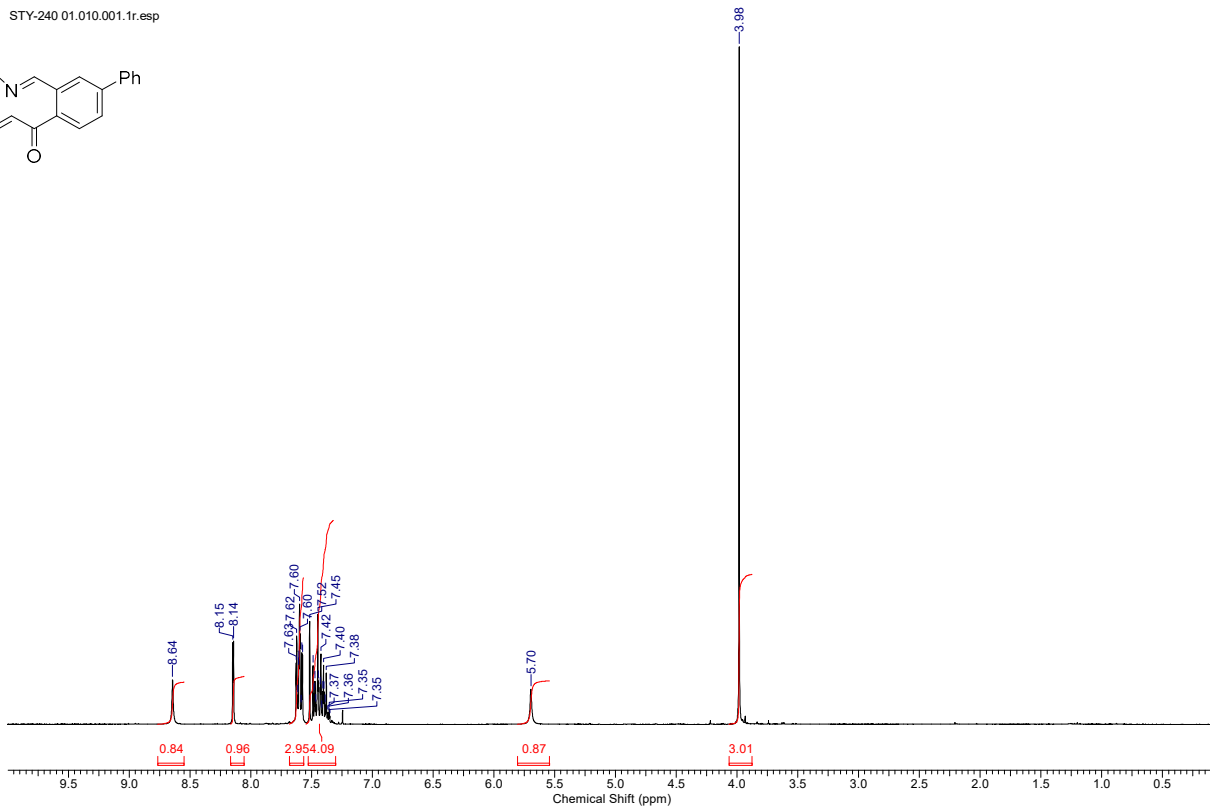

STY-240Cdept135.013.001.1r.esp

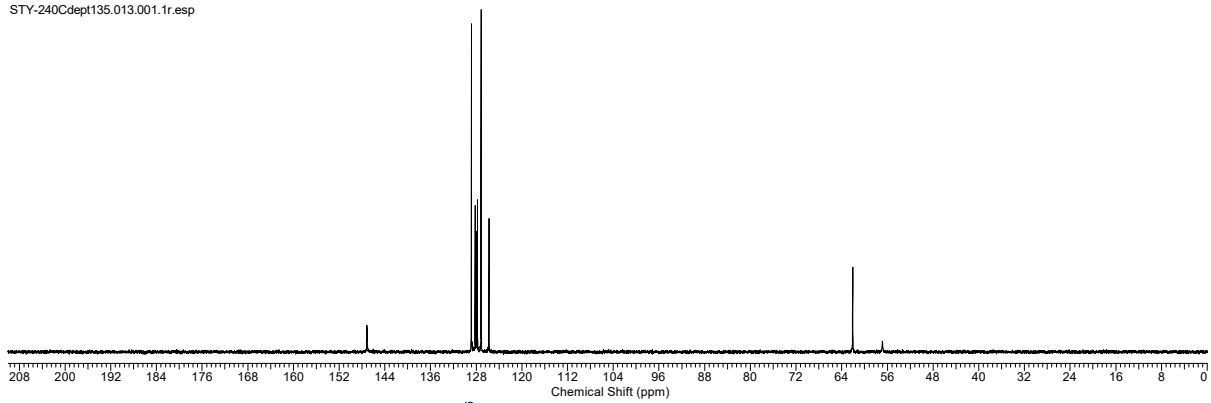

STY-240C.010.001.1r.esp

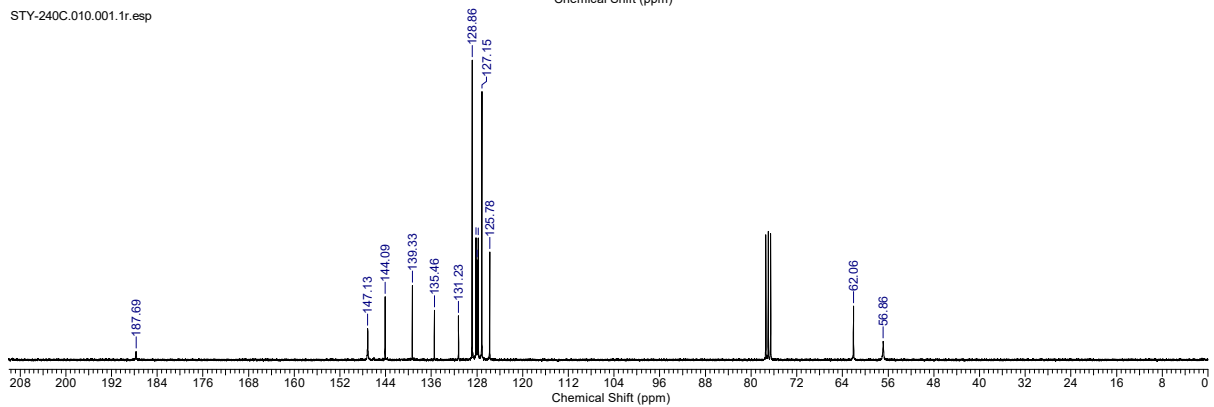

# $^1\text{H}$ and $^{13}\text{C}$ NMR of **1e**

STY-262 2 1.010.001.1r.esp

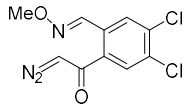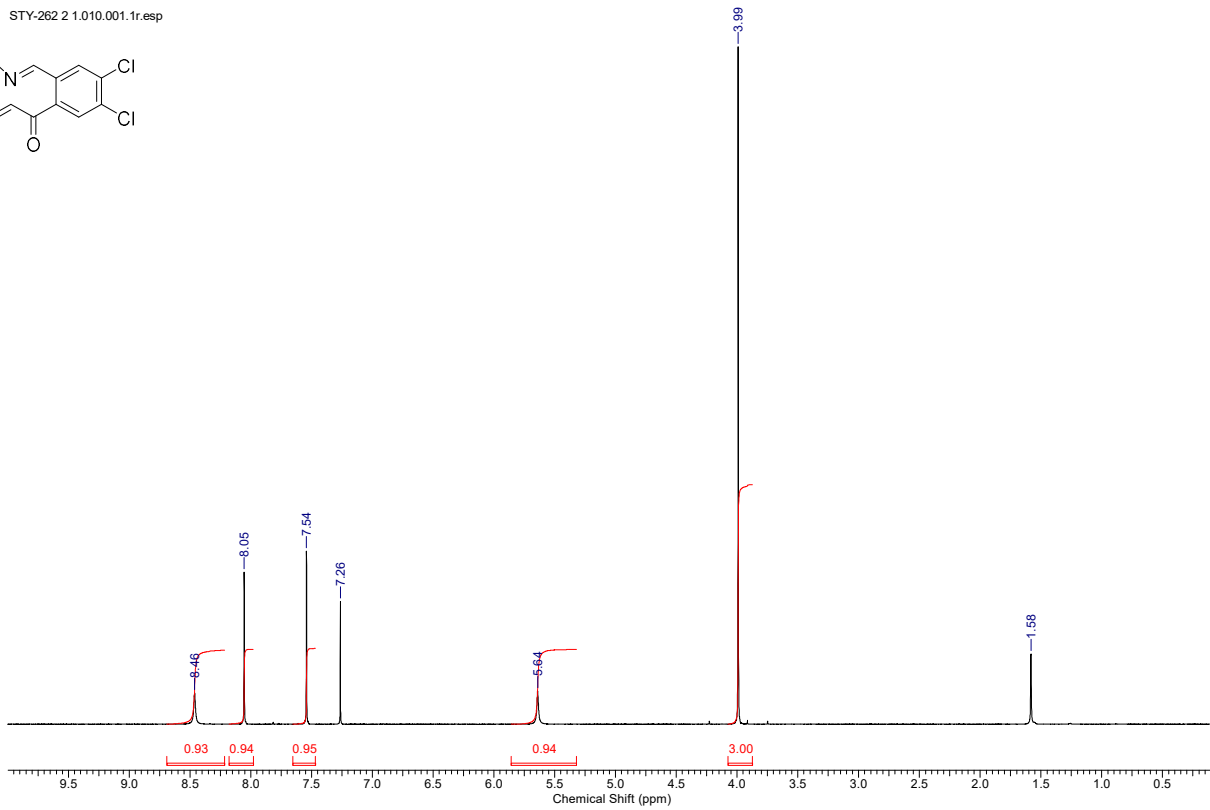

STY-262 2C dept 135.010.001.1r.esp

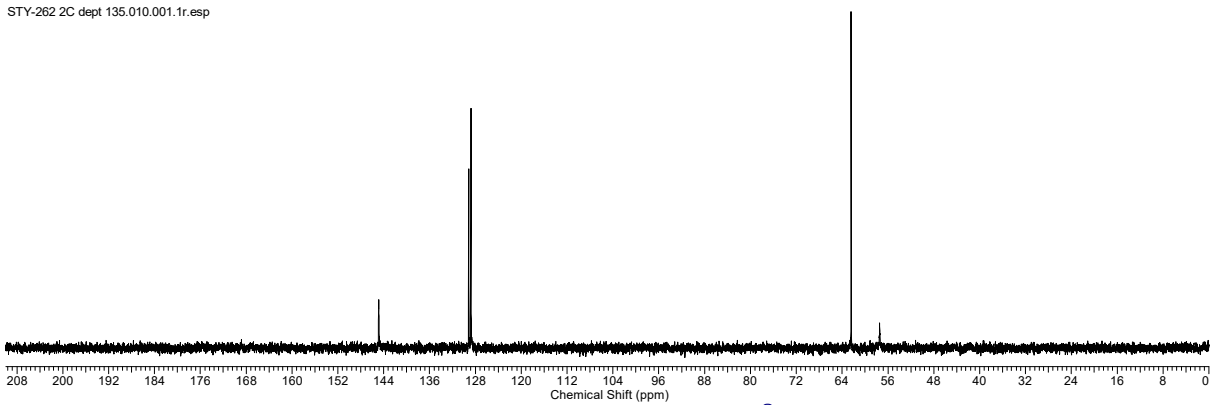

STY-262 2C.010.001.1r.esp

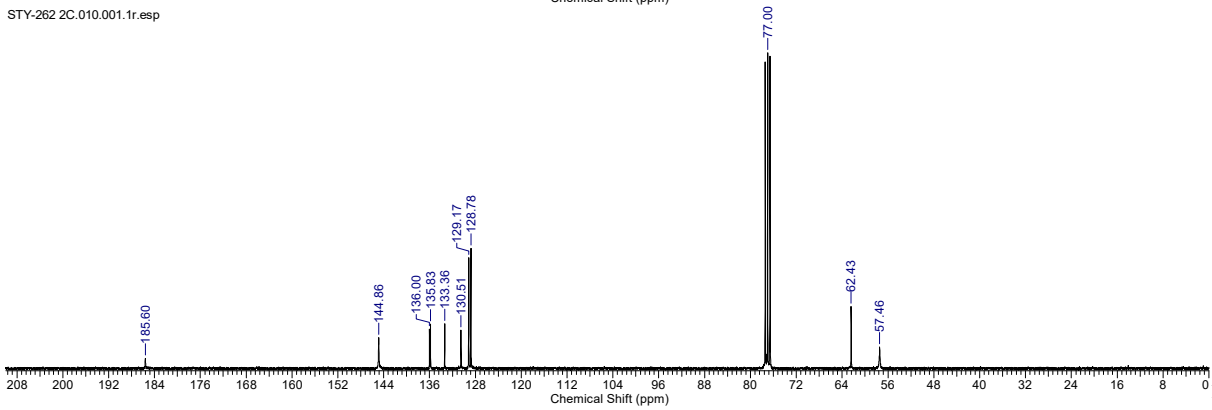

$^1\text{H}$  and

# <sup>13</sup>C NMR of **4a**

tb 276-5 300 1H.010.001.1r.esp

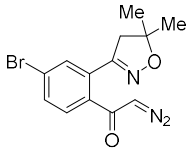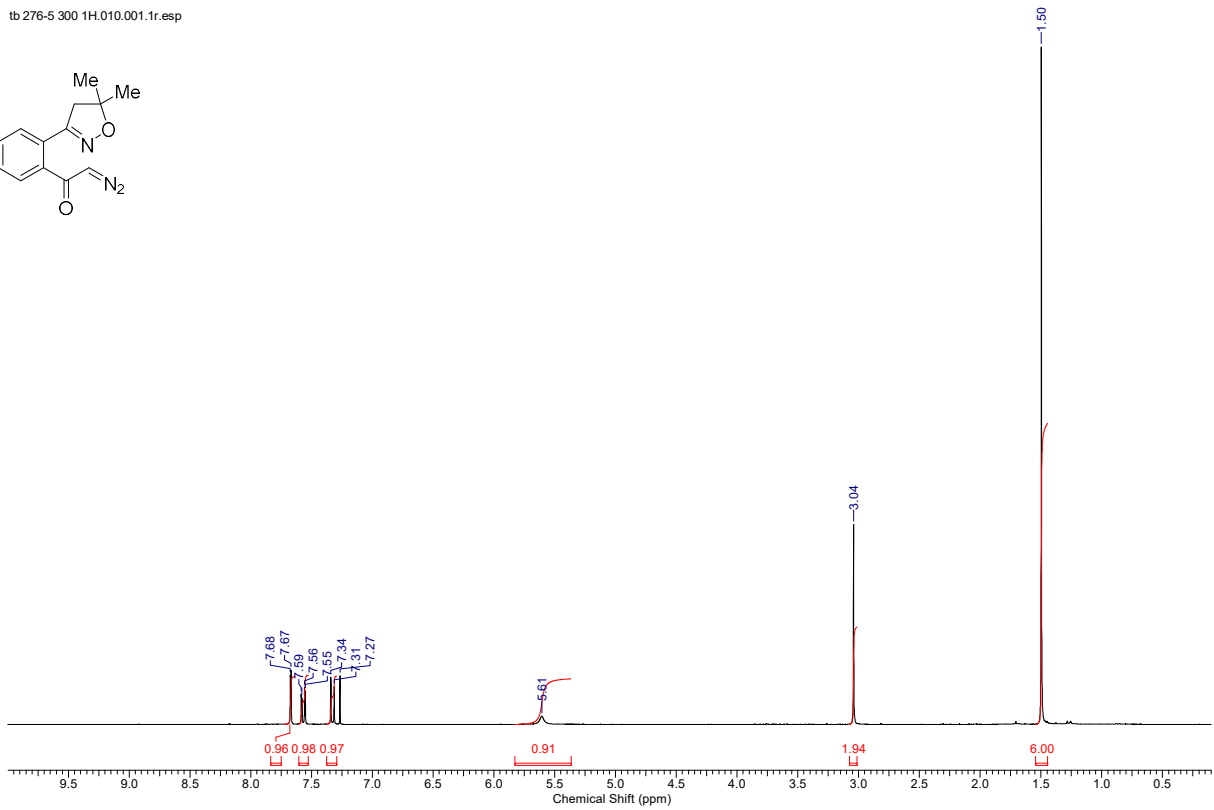

tb 276-5 13C DEPT135 0224.010.001.1r.esp

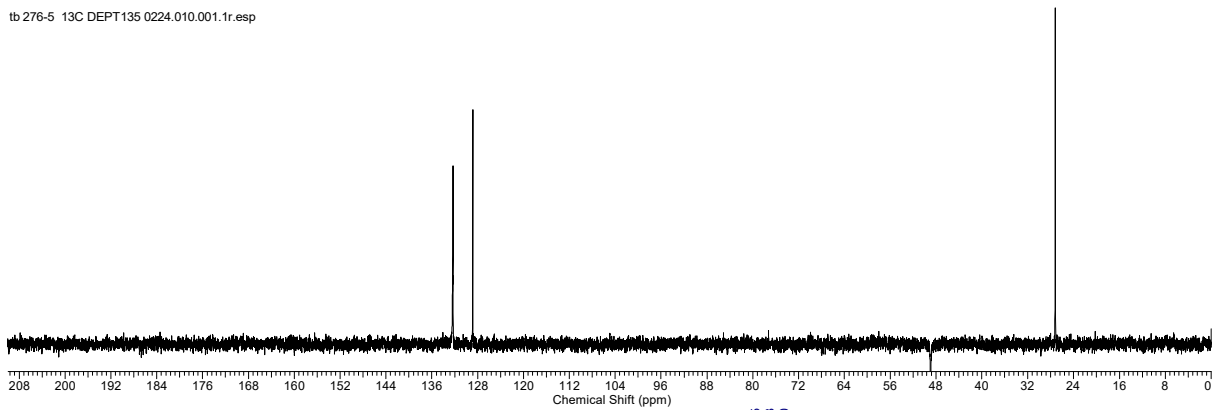

tb 276-5 13C 0224.010.001.1r.esp

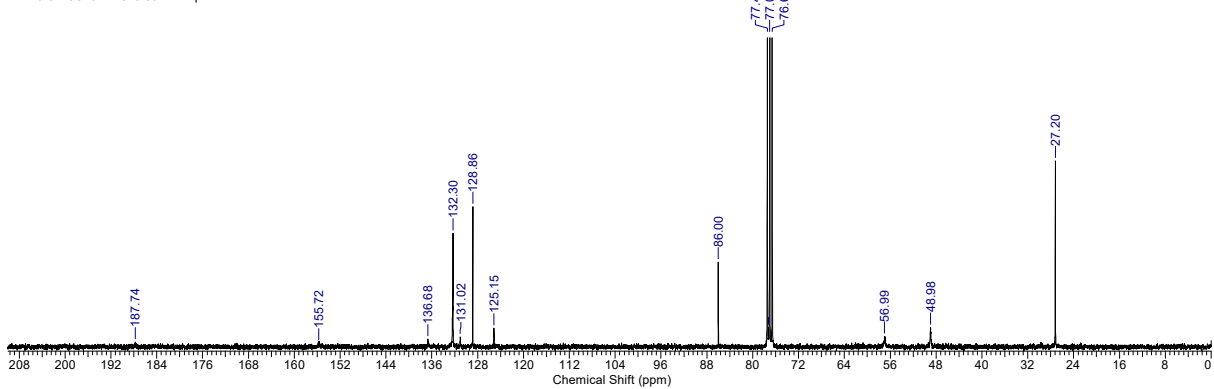



# <sup>1</sup>H and <sup>13</sup>C NMR of **4b**

tb 296-1 1H 1f.010.001.1r.esp

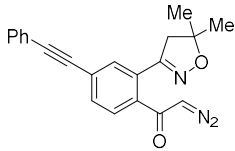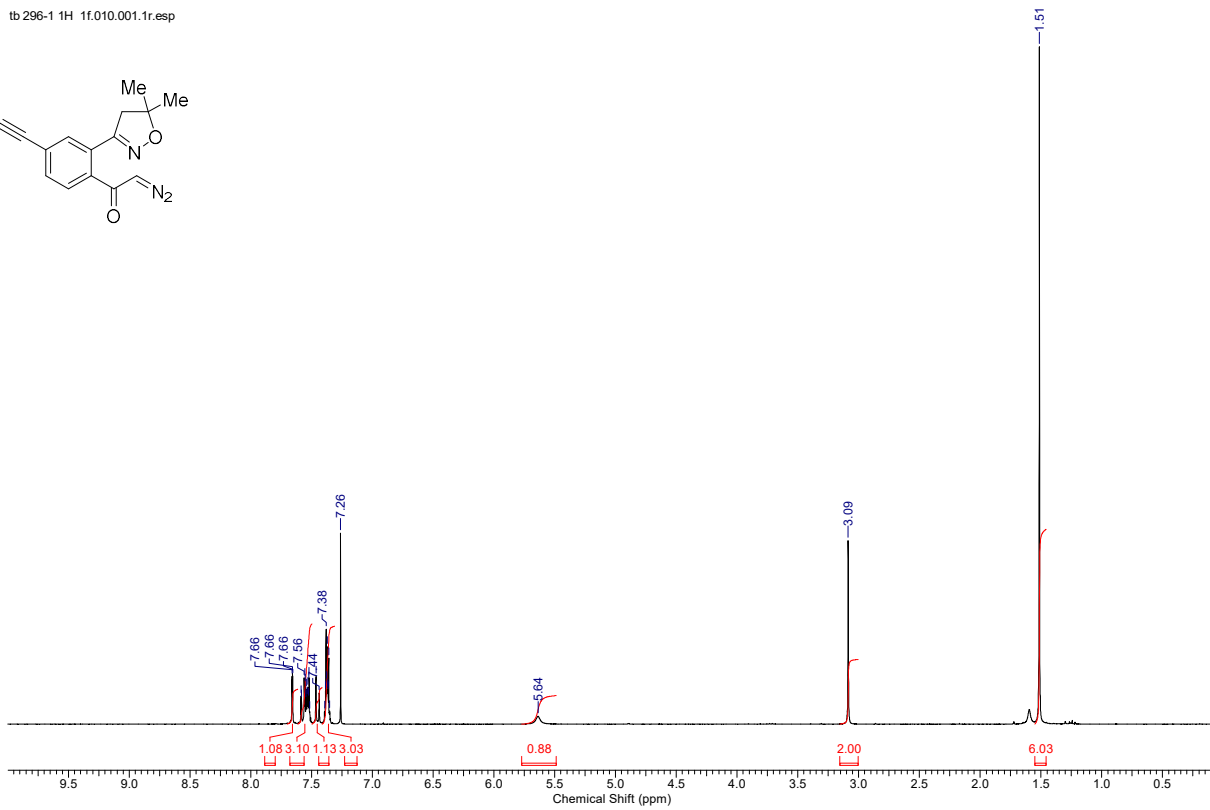

tb 296-1 300 DEPT135 1f.010.001.1r.esp

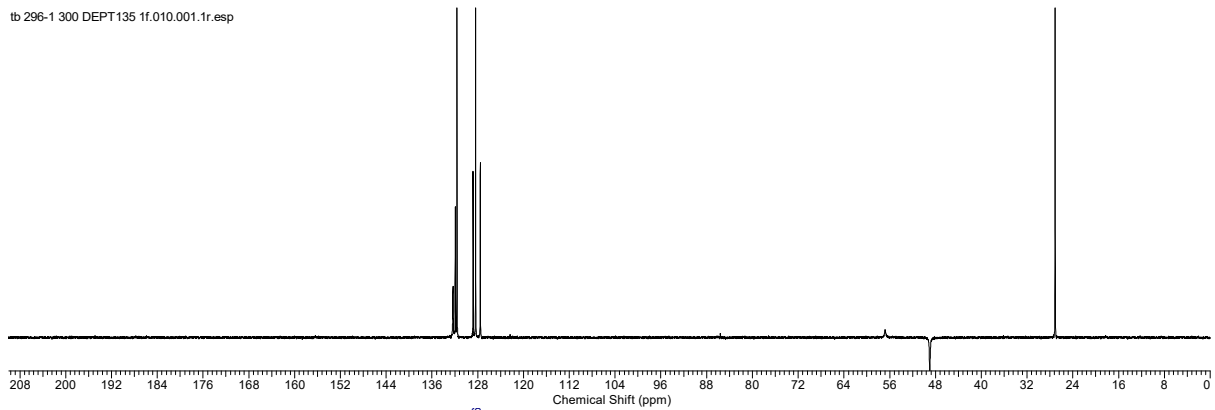

tb 296-1 300 13C 1f.010.001.1r.esp

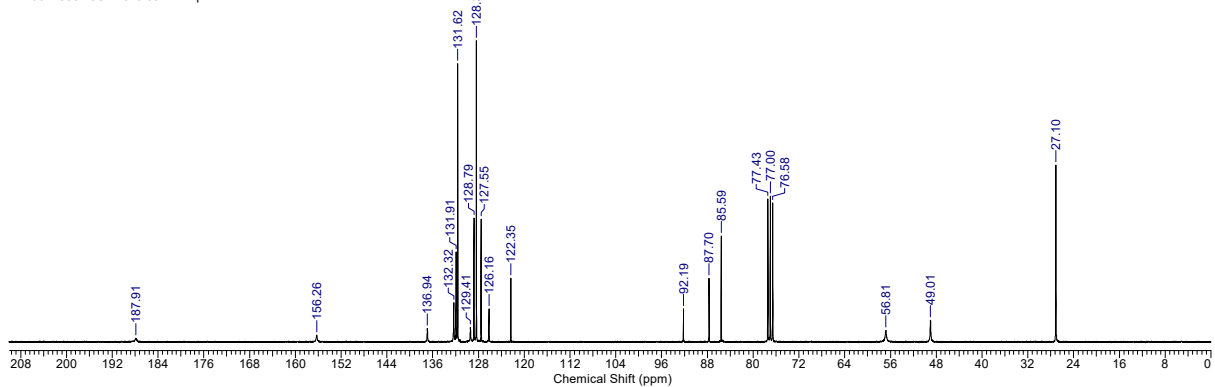

# $^1\text{H}$ and $^{13}\text{C}$ NMR of **4c**

tb 175-3 300 1H 1b.010.001.1r.esp

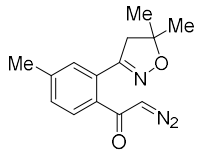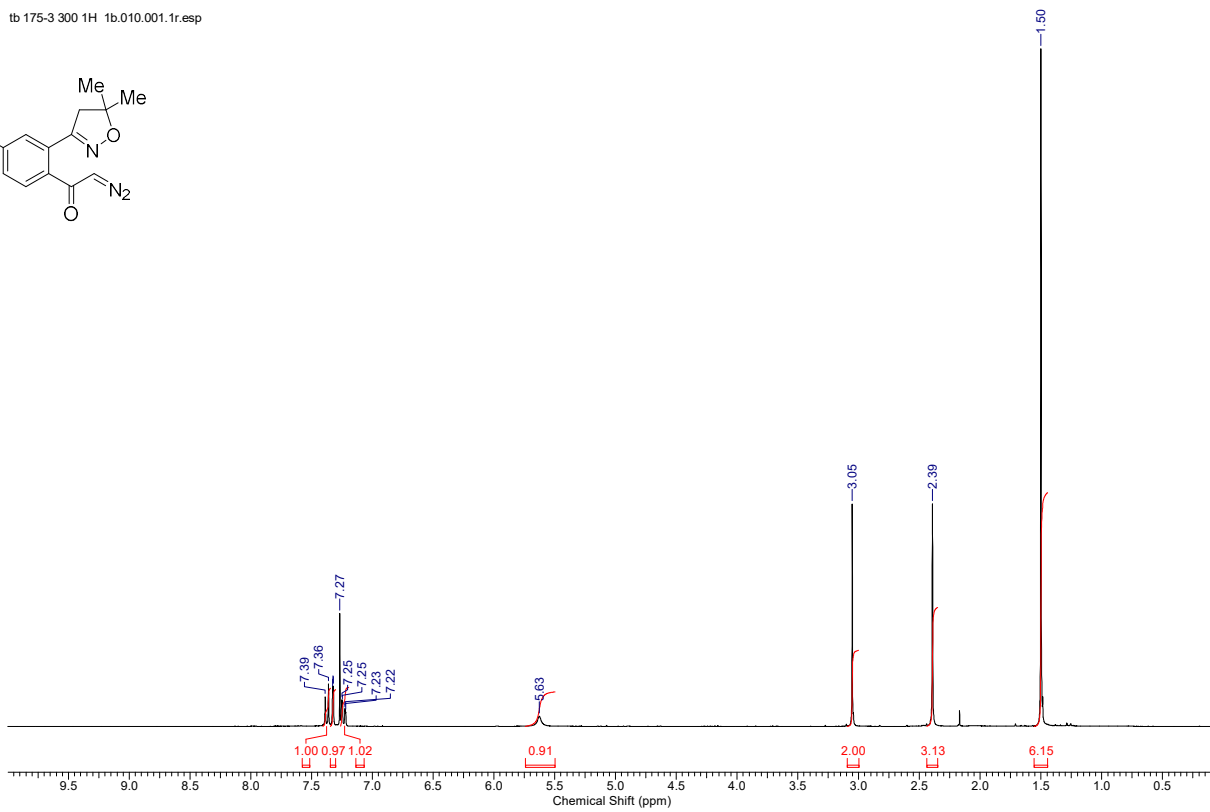

tb 175-3 300 DEPT135 1b.010.001.1r.esp

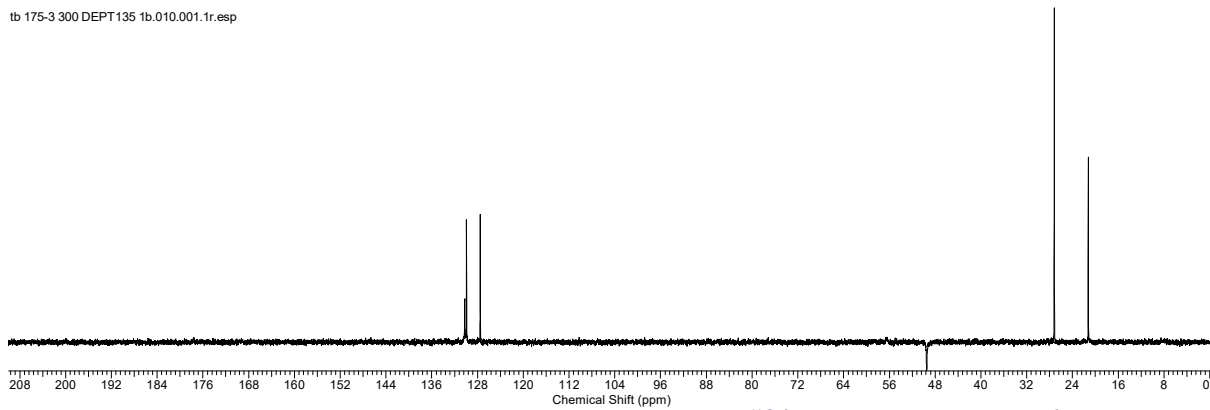

tb 175-3 300 13C 1b.010.001.1r.esp

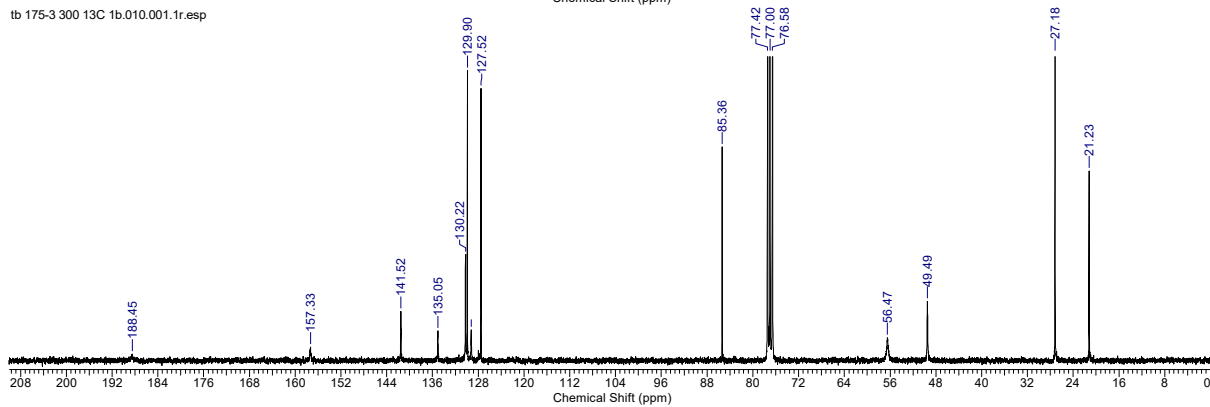

# $^1\text{H}$ and $^{13}\text{C}$ NMR of **4d**

tb 192-2 1c.010.001.1r.esp

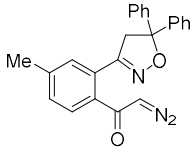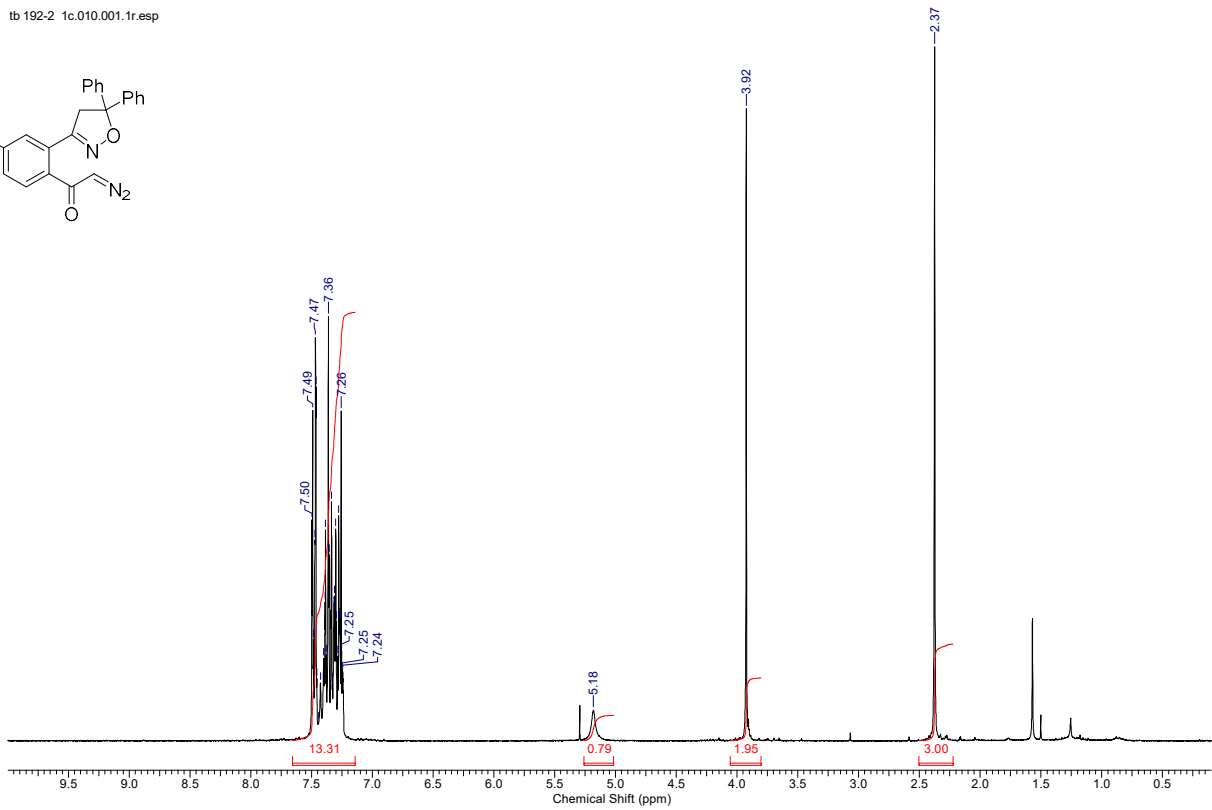

tb 192-3 500 DEPT135.012.001.1r.esp

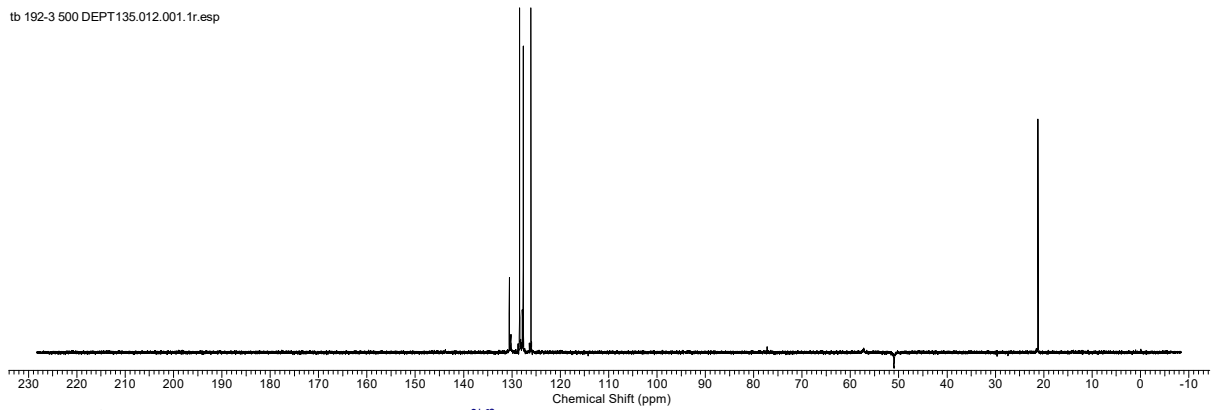

tb 192-3 500 13C.011.001.1r.esp

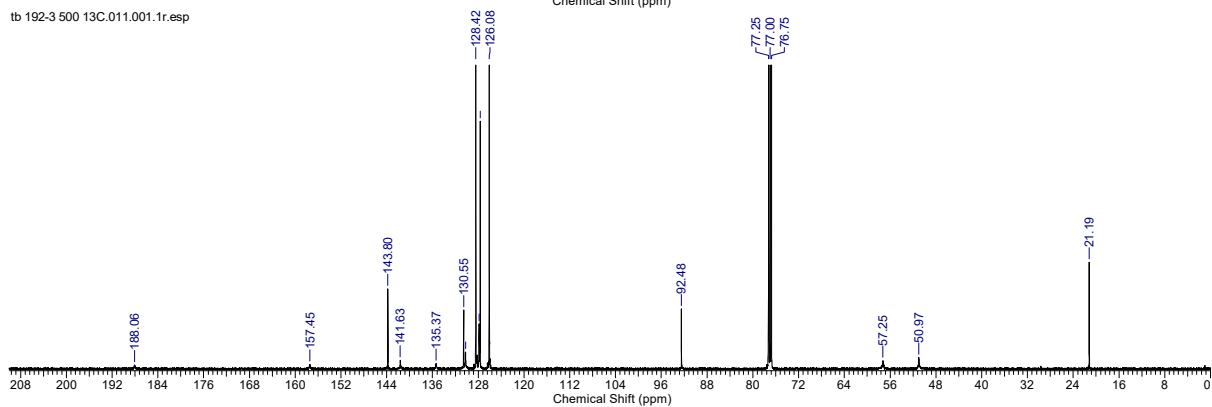

# $^1\text{H}$ and $^{13}\text{C}$ NMR of **4e**

MYW-095-1.020.001.1r.esp

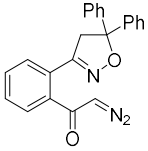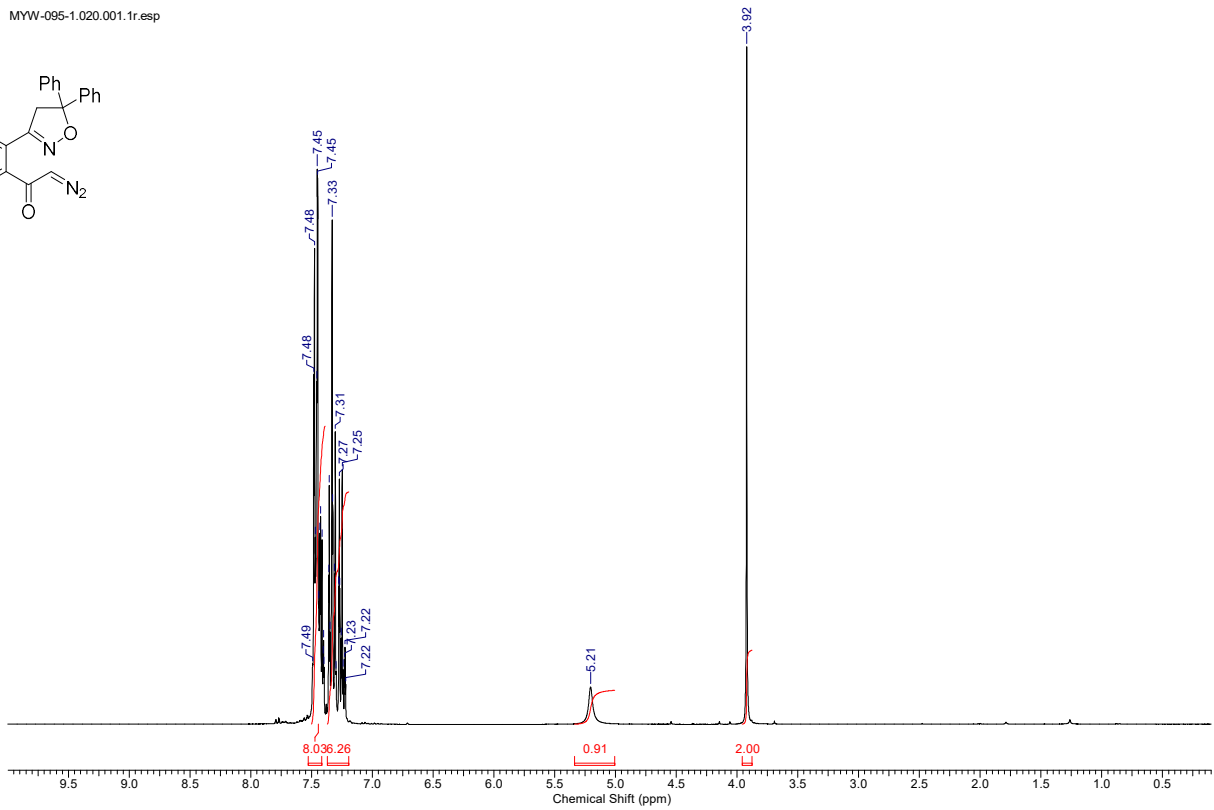

MYW-095-1 DEPT135.020.001.1r.esp

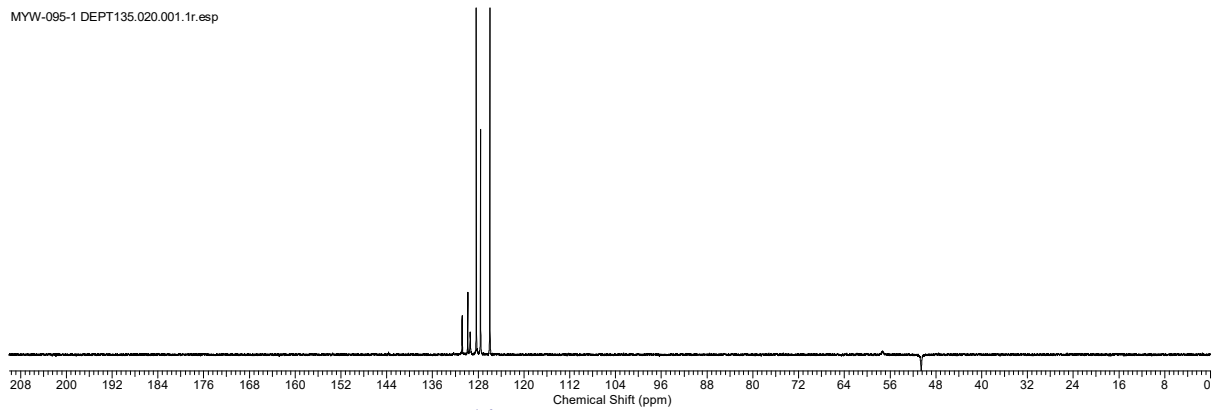

MYW-095-1 13C.020.001.1r.esp

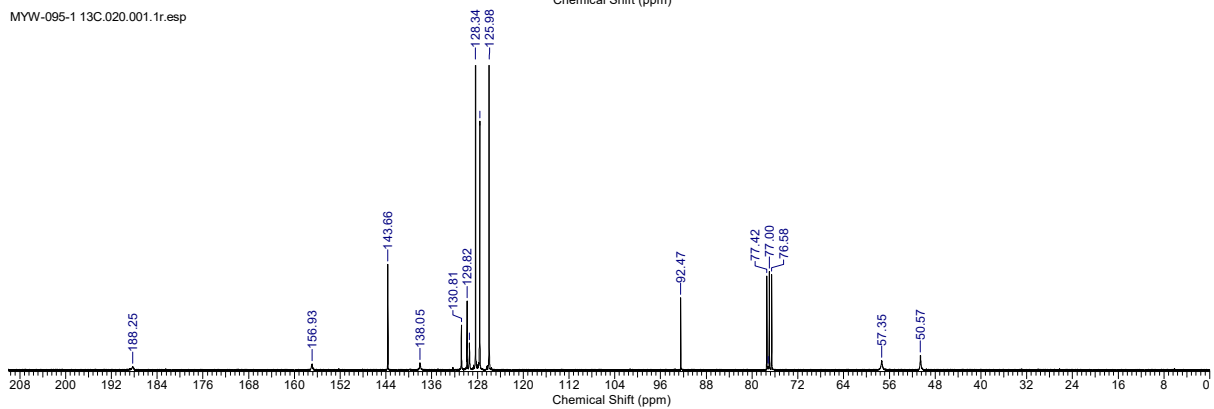

# $^1\text{H}$ and $^{13}\text{C}$ NMR of **4f**

tb 313-1.010.001.1r.esp

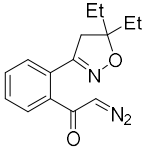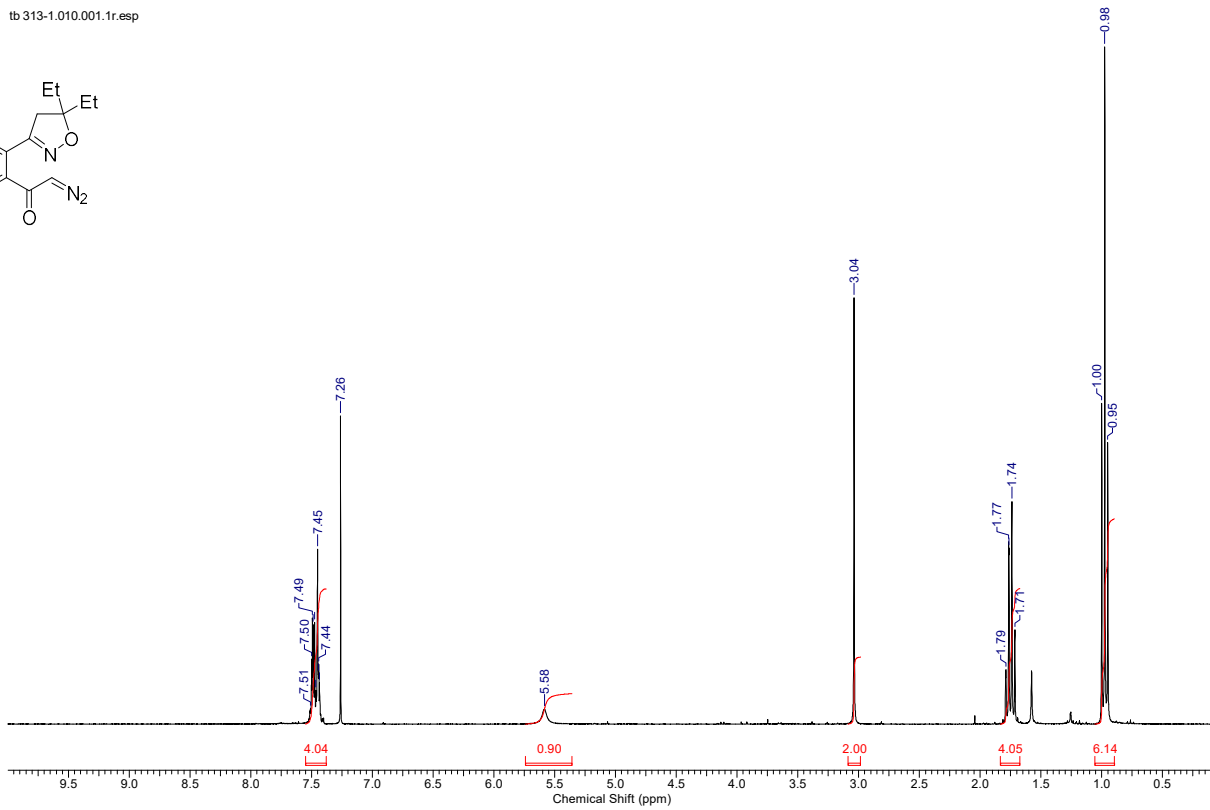

tb 313-1 300 DEPT135 1d.010.001.1r.esp

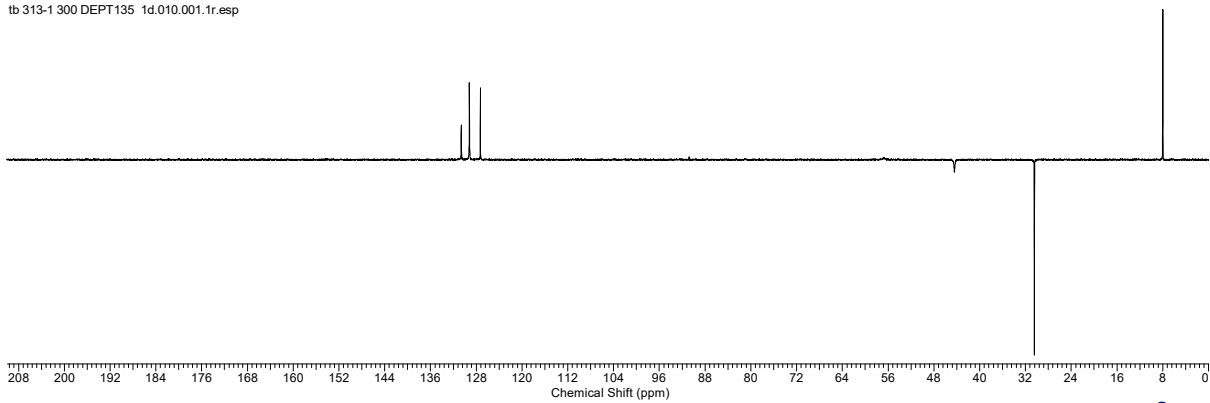

tb 313-1 300 13C 1d.010.001.1r.esp

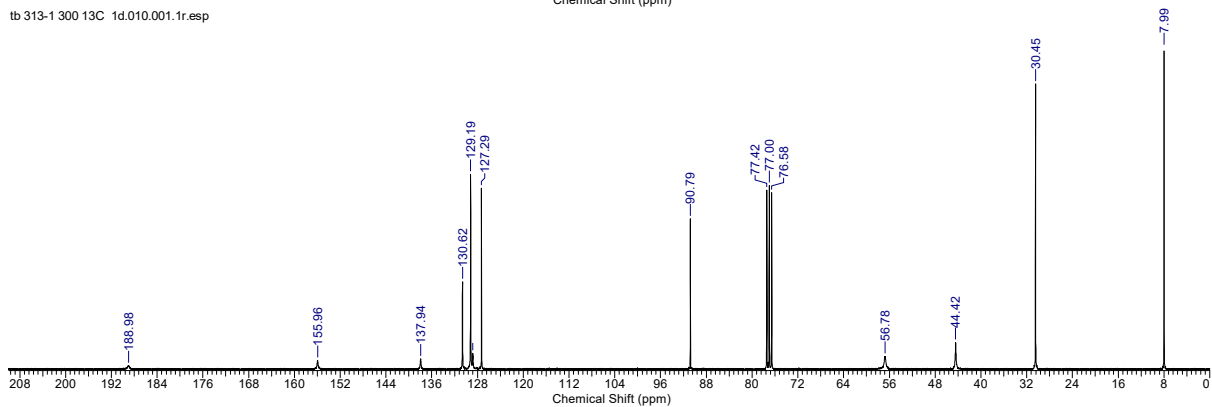

# $^1\text{H}$ and $^{13}\text{C}$ NMR of **4g**

MYW-012-2.020.001.1r.esp

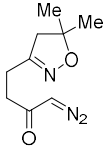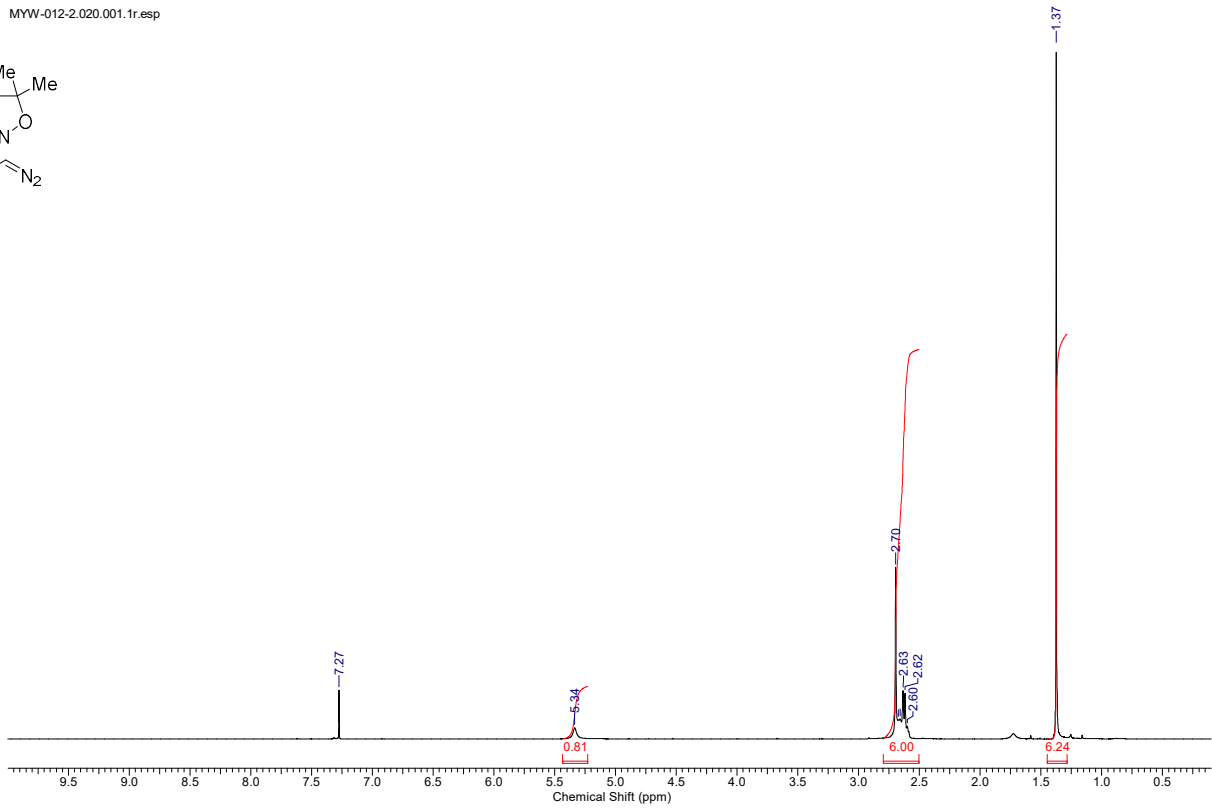

MYW-012-2 DEPT135.010.001.1r.esp

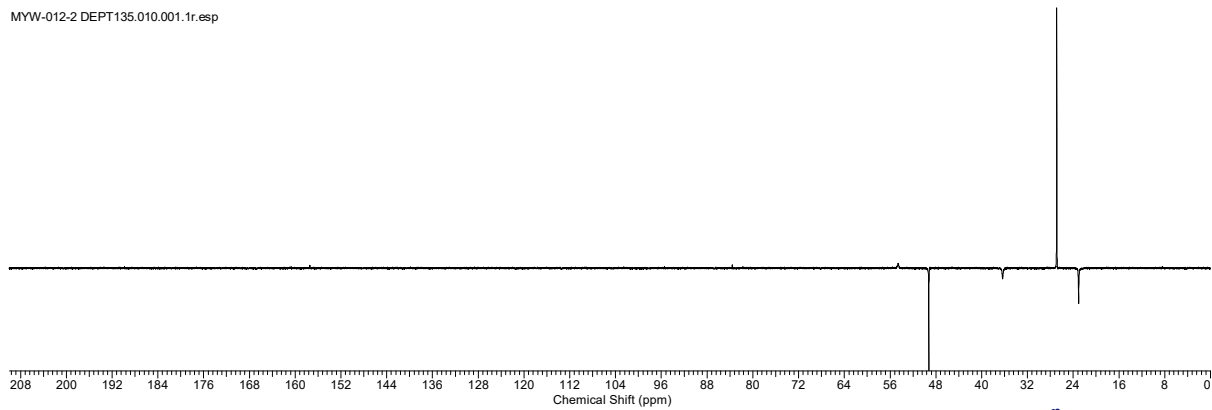

MYW-012-2 13C.010.001.1r.esp

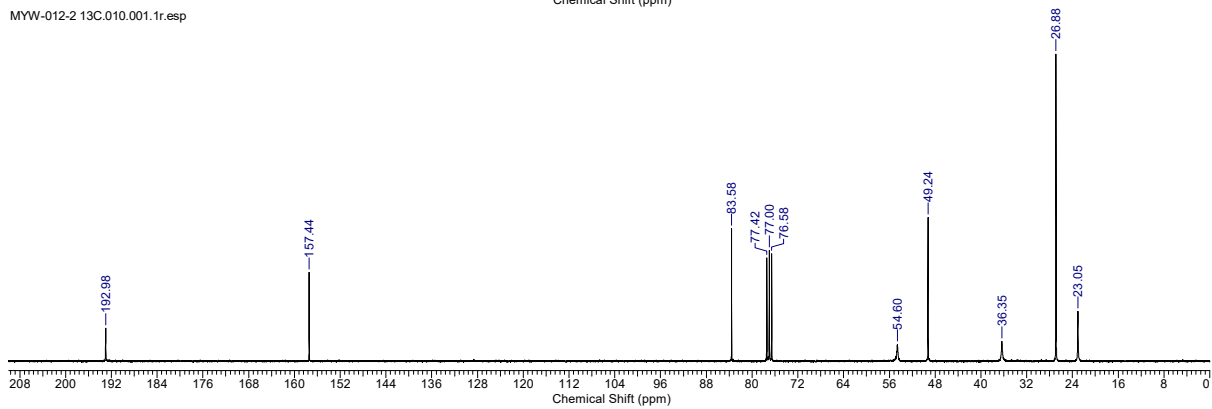

# $^1\text{H}$ and $^{13}\text{C}$ NMR of ligand E

17MKNS-160-cc3-fr2-H-2.010.001.1r.esp

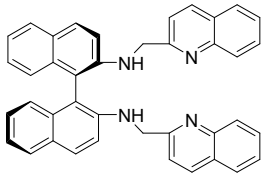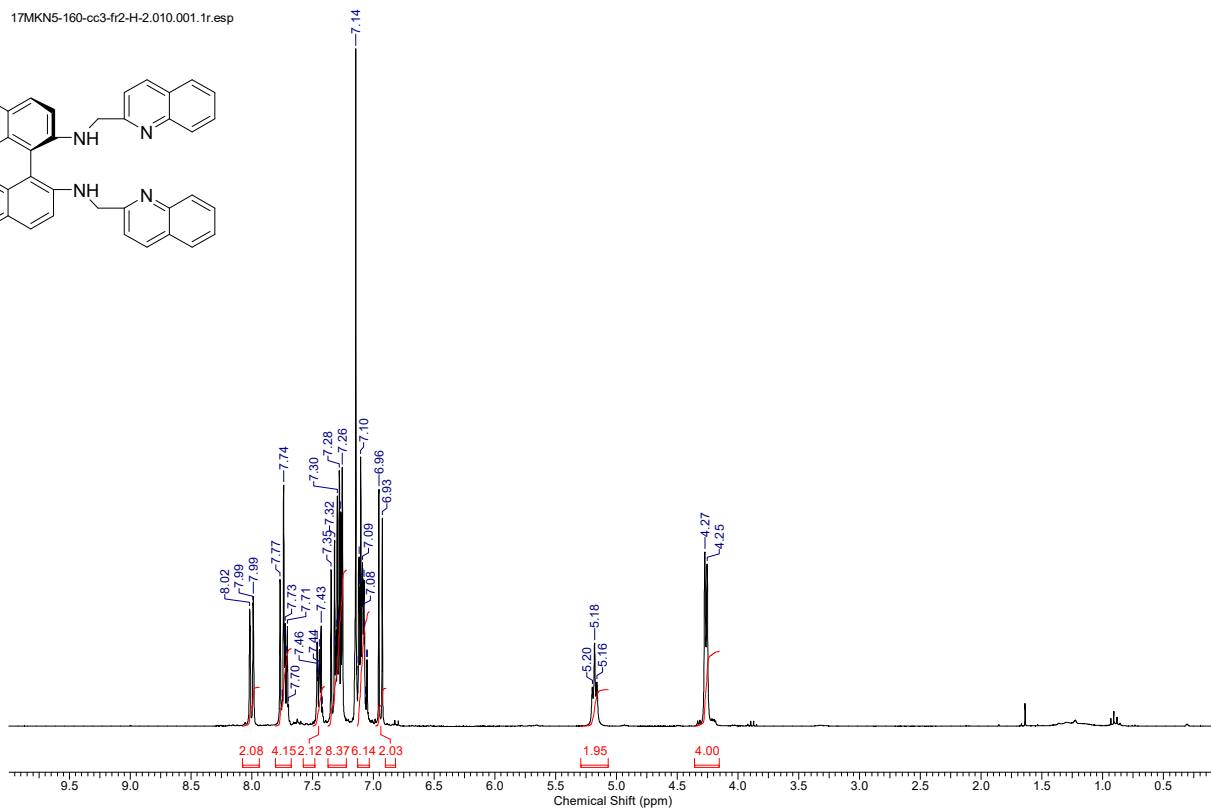

17MKNS-160-cc3-fr2-dept135.010.001.1r.esp

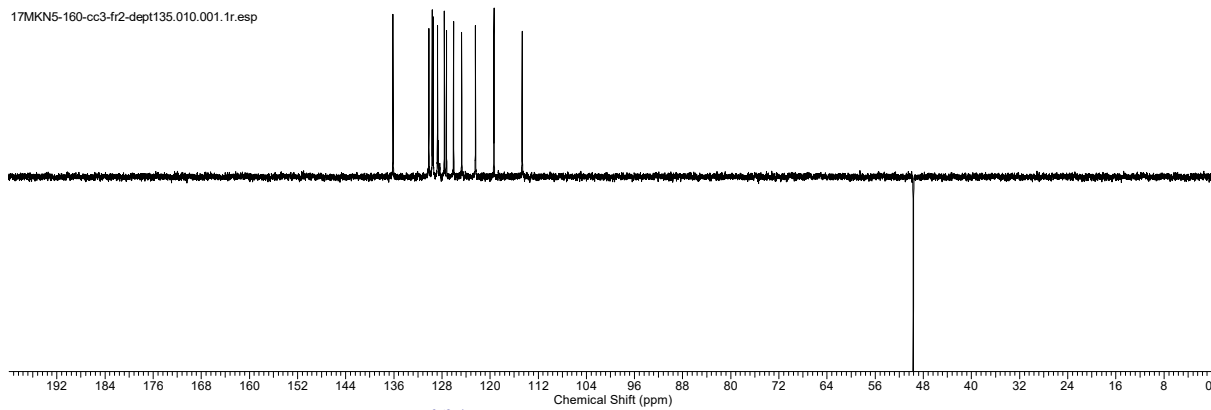

17MKNS-160-cc3-fr2-13C.010.001.1r.esp

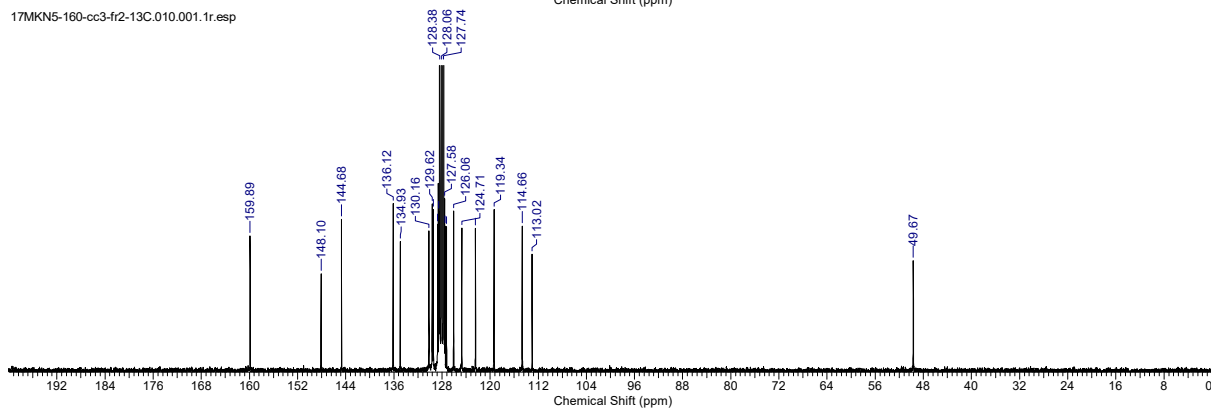

## HPLC analysis of 6

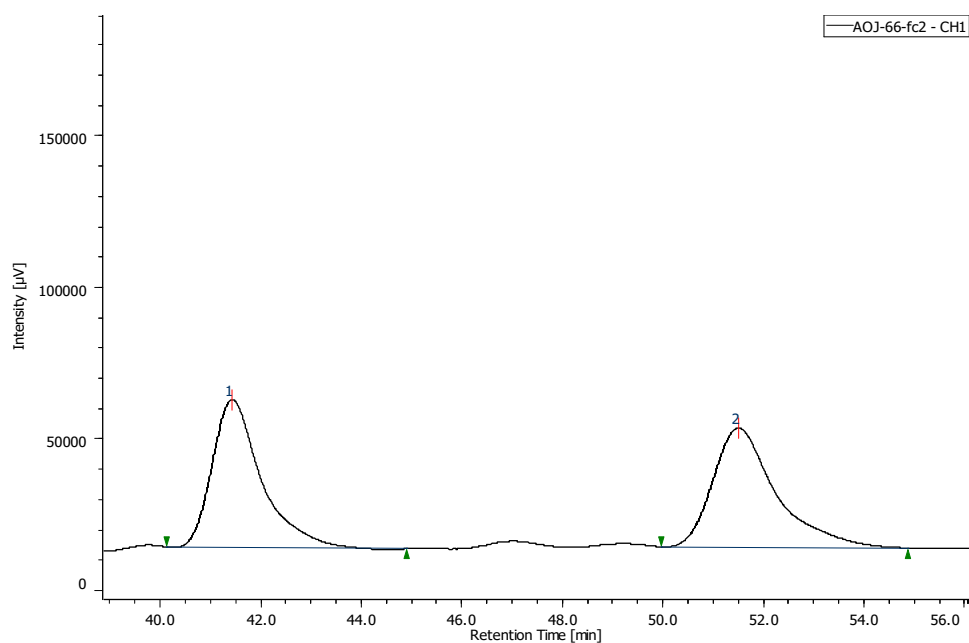

| # Peak | CH | tR (min) | Area    | Height | Area%  |
|--------|----|----------|---------|--------|--------|
| 1      | 3  | 41.433   | 3300235 | 48609  | 49.271 |
| 2      | 3  | 51.475   | 3397943 | 39137  | 50.729 |

### Racemate

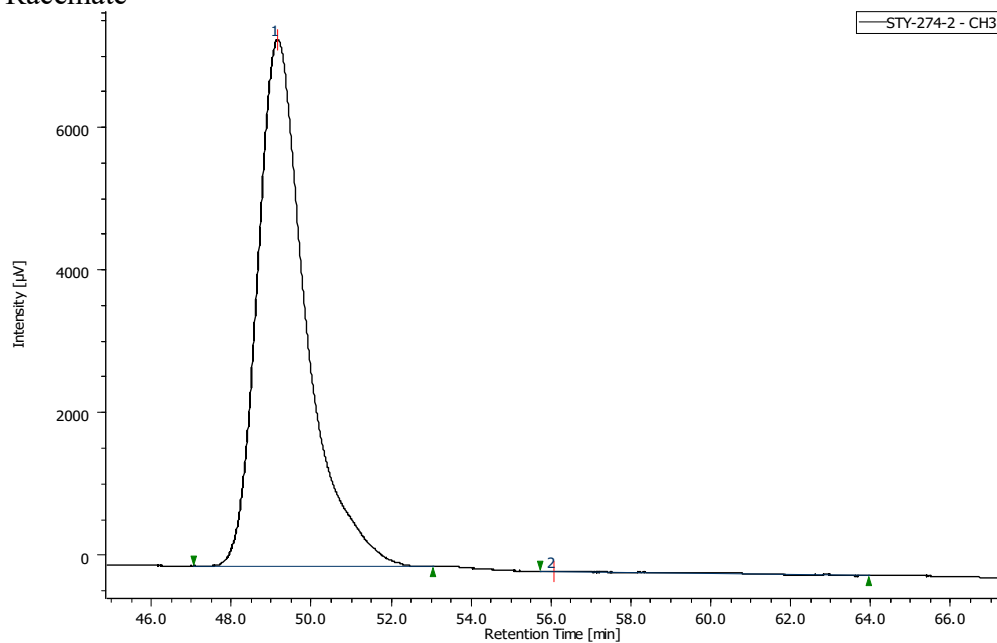

| # Peak | CH | tR (min) | Area   | Height | Area%  |
|--------|----|----------|--------|--------|--------|
| 1      | 3  | 49.15    | 621255 | 7373   | 99.711 |
| 2      | 3  | 56.075   | 1800   | 7      | 0.289  |

99% ee

Daicel Chiralpak AD-3, Hexane:*i*-PrOH = 86:14, v/v, detector: UV 254 nm, flow rate = 0.5 mL/min, 35 °C

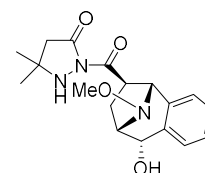



### HPLC analysis of *exo*-3d

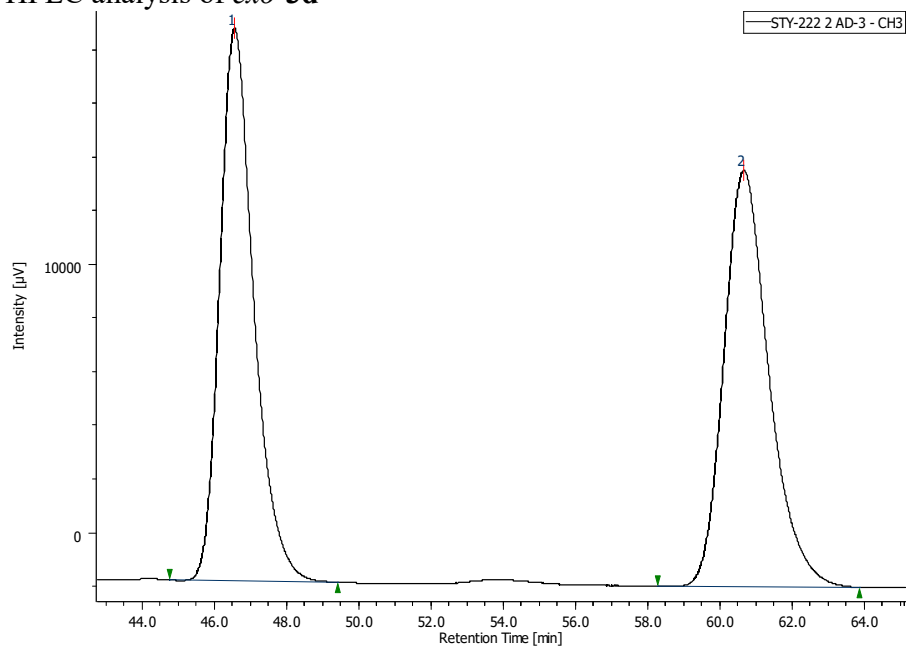

| # Peak | CH | tR (min) | Area    | Height | Area%  |
|--------|----|----------|---------|--------|--------|
| 1      | 3  | 46.567   | 1341488 | 20557  | 50.036 |
| 2      | 3  | 60.642   | 1339575 | 15483  | 49.964 |

Racemate

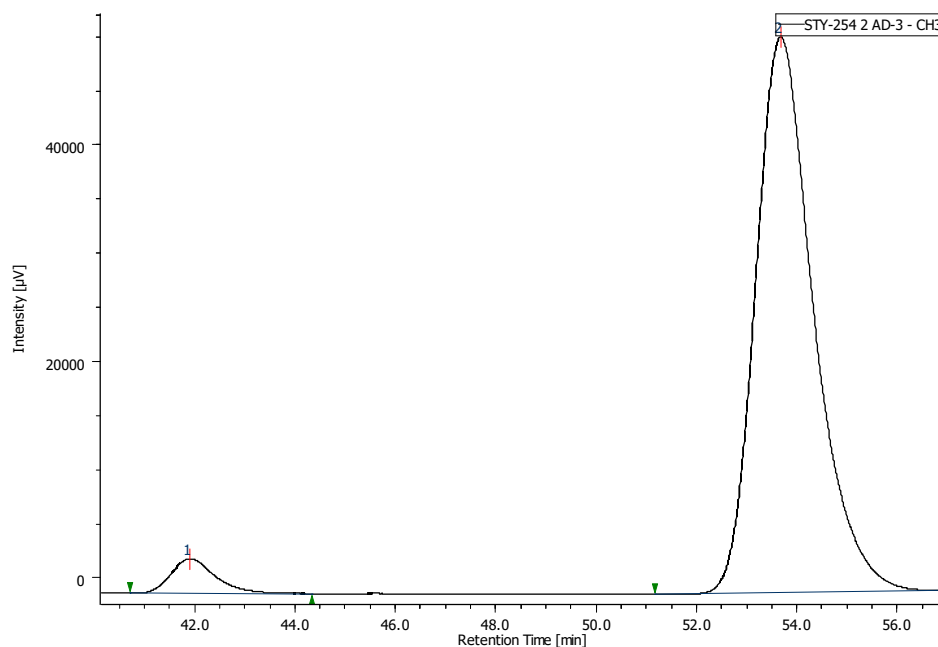

| # Peak | CH | tR (min) | Area    | Height | Area%  |
|--------|----|----------|---------|--------|--------|
| 1      | 3  | 41.917   | 195873  | 3198   | 4.497  |
| 2      | 3  | 53.658   | 4160103 | 51382  | 95.503 |

91% ee

Daicel Chiralpak AD-3, Hexane:*i*-PrOH = 90:10, v/v, detector: UV 254 nm, flow rate = 0.5 mL/min, 35 °C

### HPLC analysis of the alcohol obtained from *exo-3e*

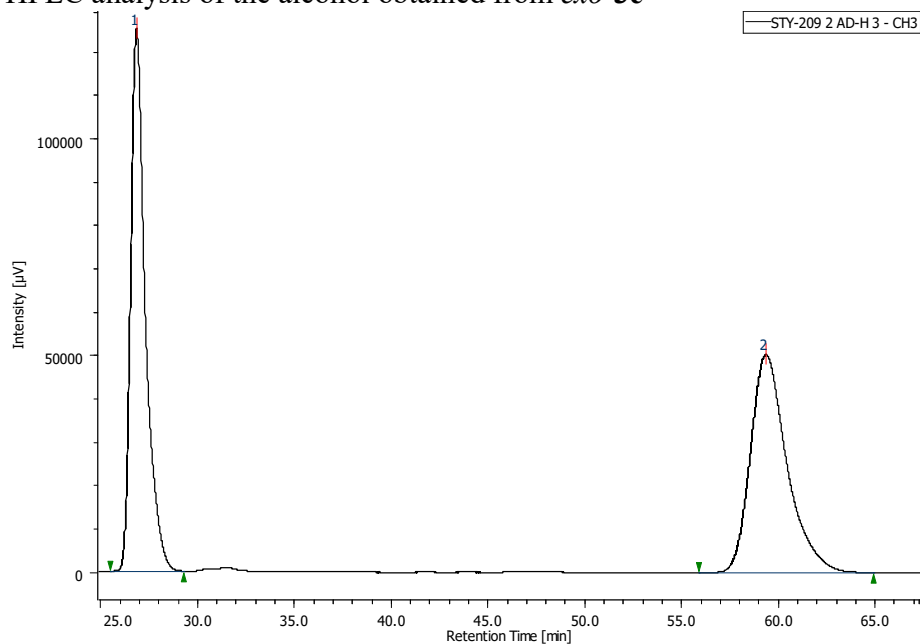

| # Peak | CH | tR (min) | Area    | Height | Area%  |
|--------|----|----------|---------|--------|--------|
| 1      | 3  | 26.85    | 6577525 | 124970 | 49.995 |
| 2      | 3  | 59.308   | 6578731 | 50244  | 50.005 |

Racemate

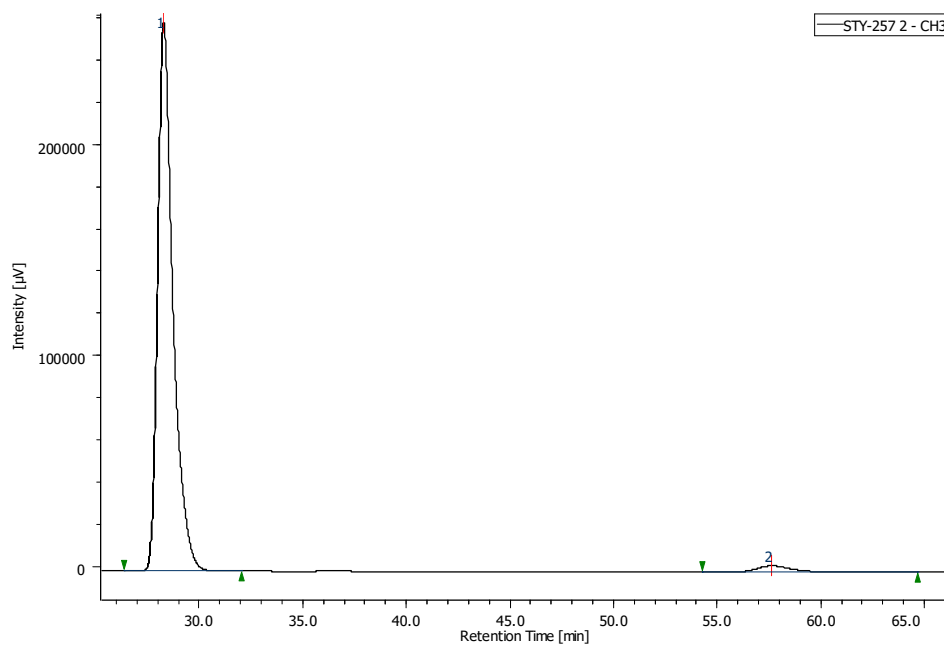

| # Peak | CH | tR (min) | Area     | Height | Area%  |
|--------|----|----------|----------|--------|--------|
| 1      | 3  | 28.292   | 13286393 | 258632 | 97.428 |
| 2      | 3  | 57.608   | 350735   | 3004   | 2.572  |

95% ee

Daicel Chiralpak AD-H, Hexane:*i*-PrOH = 75:25, v/v, detector: UV 254 nm, flow rate = 0.5 mL/min, 35 °C

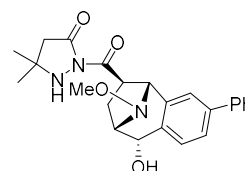

### HPLC analysis of *exo-3f*

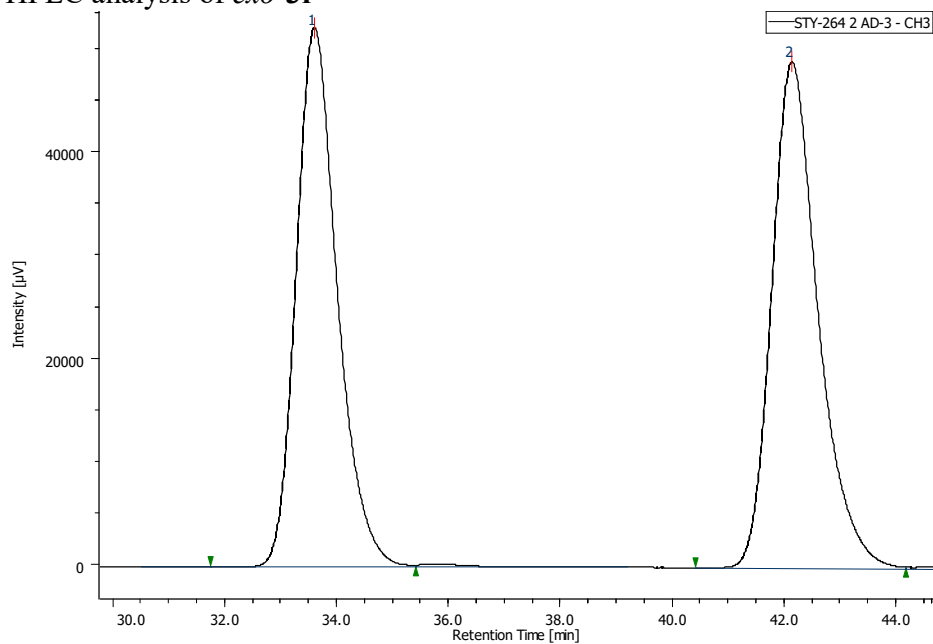

| # Peak | CH | tR (min) | Area    | Height | Area%  |
|--------|----|----------|---------|--------|--------|
| 1      | 3  | 33.6     | 2663794 | 52172  | 48.654 |
| 2      | 3  | 42.125   | 2811130 | 48915  | 51.346 |

Racemate

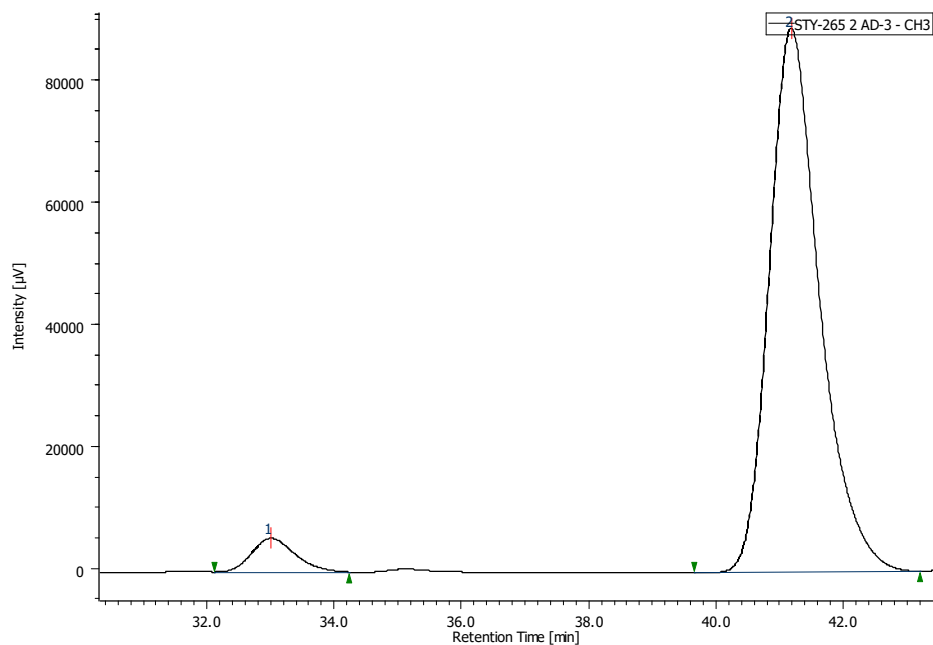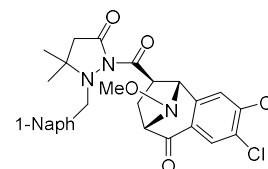

| # Peak | CH | tR (min) | Area    | Height | Area%  |
|--------|----|----------|---------|--------|--------|
| 1      | 3  | 33       | 260727  | 5503   | 5.074  |
| 2      | 3  | 41.167   | 4877446 | 88911  | 94.926 |

90% ee

Daicel Chiralpak AD-3, Hexane:*i*-PrOH = 90:10, v/v, detector: UV 254 nm, flow rate = 0.5 mL/min, 35 °C

### HPLC analysis of *endo*-5a

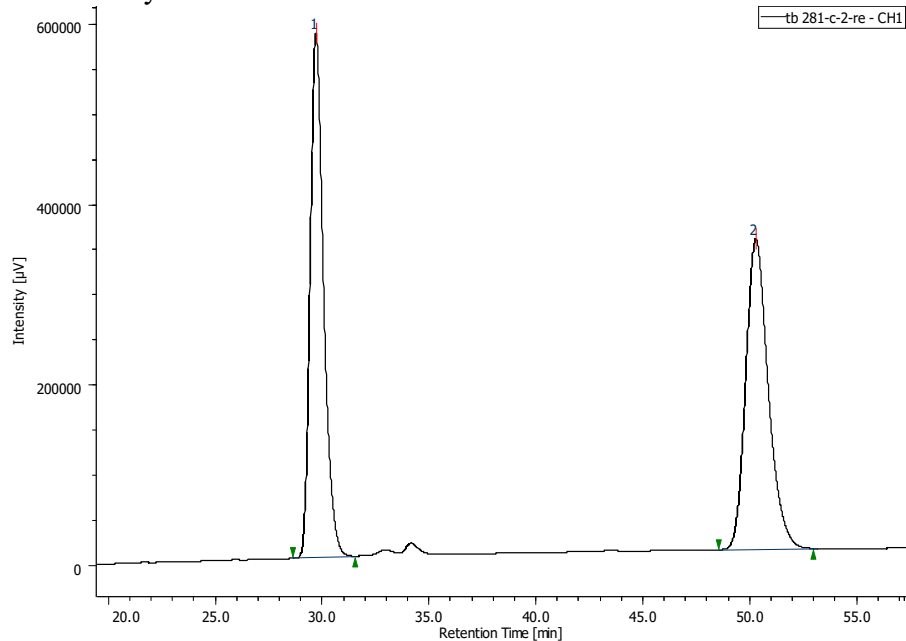

| # Peak | CH | tR (min) | Area     | Height | Area%  |
|--------|----|----------|----------|--------|--------|
| 1      | 3  | 29.7     | 25081371 | 579688 | 50.049 |
| 2      | 3  | 50.25    | 25032188 | 343096 | 49.951 |

Racemate

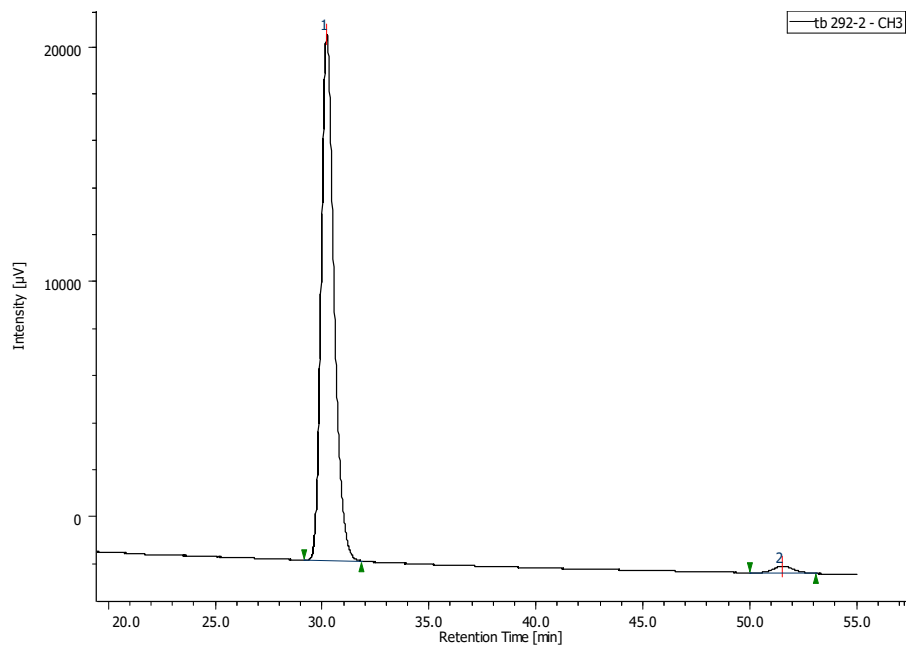

| # Peak | CH | tR (min) | Area   | Height | Area%  |
|--------|----|----------|--------|--------|--------|
| 1      | 3  | 30.208   | 934011 | 22346  | 97.931 |
| 2      | 3  | 51.492   | 19733  | 290    | 2.069  |

96% ee

Daicel Chiralpak AD-3, Hexane:*i*-PrOH = 90:10, v/v, detector: UV 254 nm, flow rate = 0.5 mL/min, 35 °C

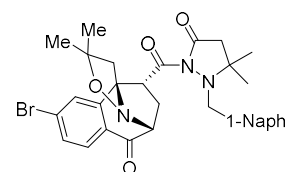

### HPLC analysis of *endo-5b*

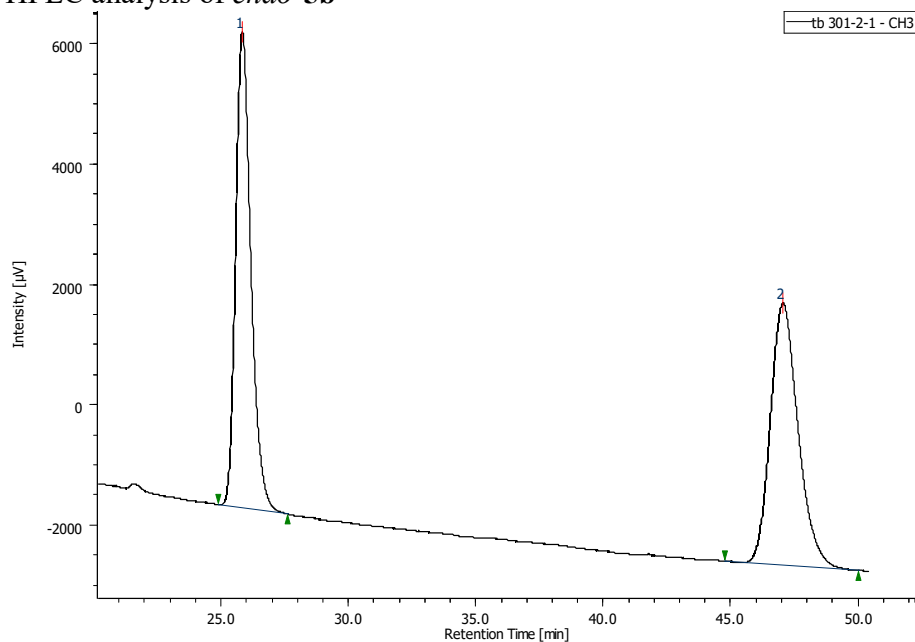

| # Peak | CH | tR (min) | Area   | Height | Area%  |
|--------|----|----------|--------|--------|--------|
| 1      | 3  | 25.833   | 327842 | 7890   | 49.978 |
| 2      | 3  | 47.017   | 328133 | 4345   | 50.022 |

Racemate

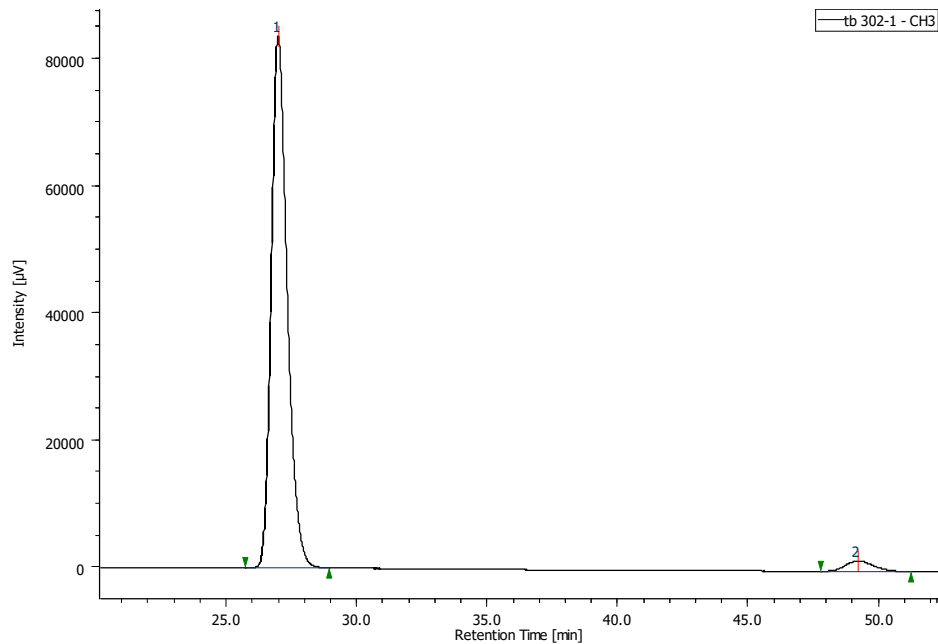

| # Peak | CH | tR (min) | Area    | Height | Area%  |
|--------|----|----------|---------|--------|--------|
| 1      | 3  | 26.992   | 3542790 | 83457  | 96.888 |
| 2      | 3  | 49.208   | 125990  | 1677   | 3.112  |

94% ee

Daicel Chiralpak AD-3, Hexane:*i*-PrOH = 90:10, v/v, detector: UV 254 nm, flow rate = 0.5 mL/min, 35 °C

### HPLC analysis of *endo-5c*

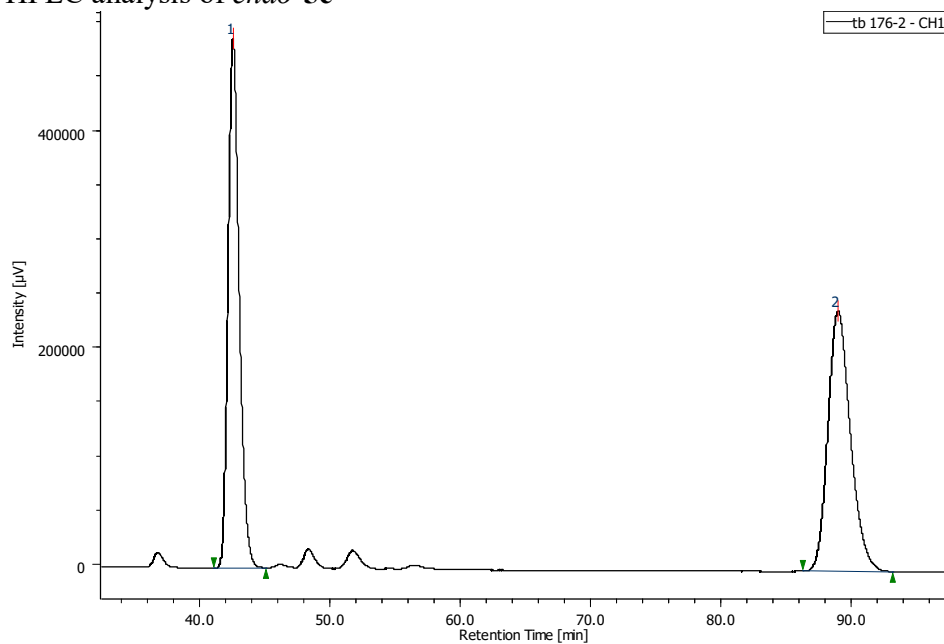

| # Peak | CH | tR (min) | Area     | Height | Area% |
|--------|----|----------|----------|--------|-------|
| 1      | 3  | 42.558   | 28837730 | 487288 | 50    |
| 2      | 3  | 88.958   | 28837545 | 239525 | 50    |

Racemate

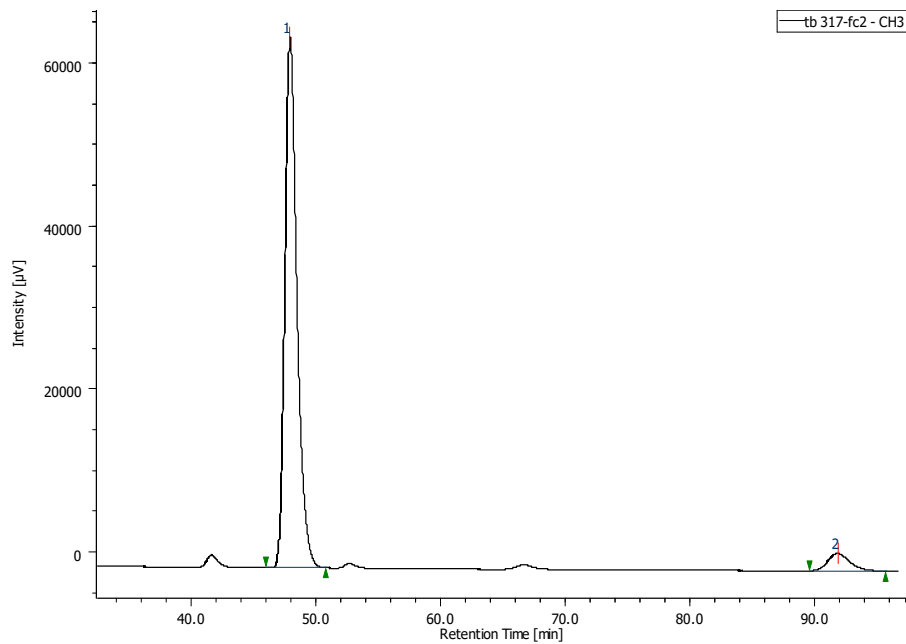

| # Peak | CH | tR (min) | Area    | Height | Area%  |
|--------|----|----------|---------|--------|--------|
| 1      | 3  | 47.933   | 4381988 | 65018  | 94.284 |
| 2      | 3  | 91.825   | 265644  | 2156   | 5.716  |

89% ee

Daicel Chiralpak AD-3, Hexane:*i*-PrOH = 93:7, v/v, detector: UV 254 nm, flow rate = 0.5 mL/min, 35 °C

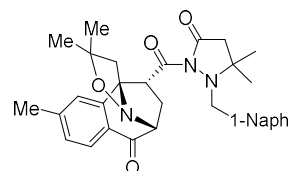

### HPLC analysis of *endo-5d*

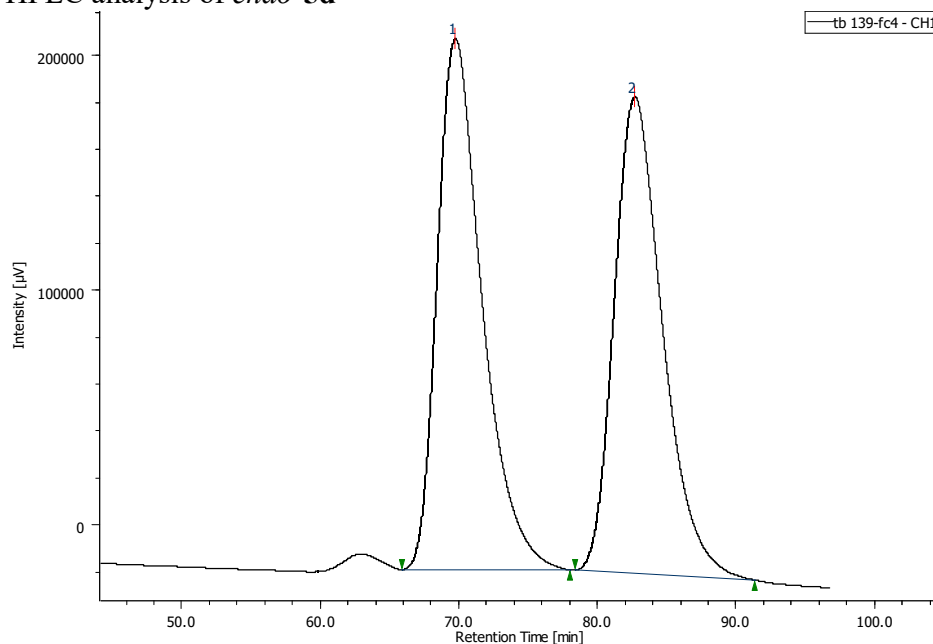

| # Peak | CH | tR (min) | Area     | Height | Area%  |
|--------|----|----------|----------|--------|--------|
| 1      | 3  | 69.717   | 50830197 | 225708 | 50.829 |
| 2      | 3  | 82.658   | 49172665 | 202683 | 49.171 |

Racemate

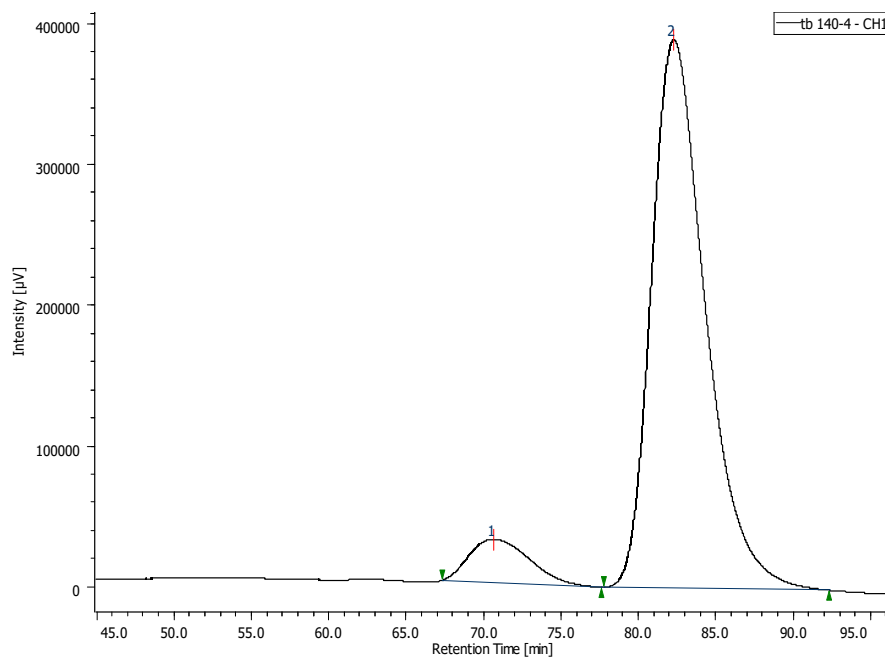

| # Peak | CH | tR (min) | Area     | Height | Area%  |
|--------|----|----------|----------|--------|--------|
| 1      | 3  | 70.617   | 8289119  | 30527  | 8.088  |
| 2      | 3  | 82.242   | 94201168 | 388347 | 91.912 |

84% ee

Daicel Chiralcel OZ-3, Hexane:*i*-PrOH = 90:10, v/v, detector: UV 254 nm, flow rate = 0.5 mL/min, 35 °C

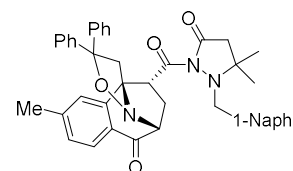

### HPLC analysis of *endo-5e*

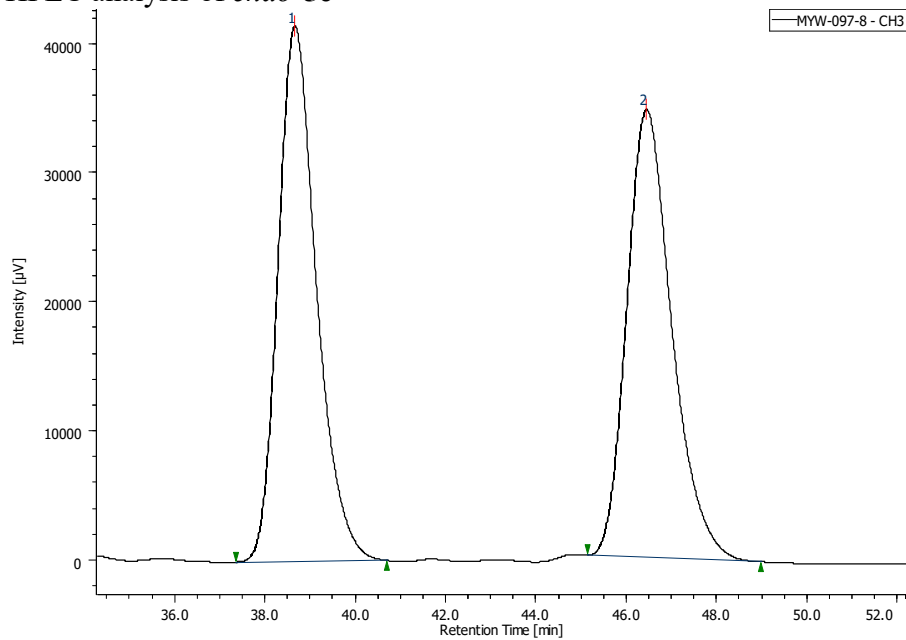

| # Peak | CH | tR (min) | Area    | Height | Area%  |
|--------|----|----------|---------|--------|--------|
| 1      | 3  | 38.658   | 2441408 | 41379  | 50.437 |
| 2      | 3  | 46.433   | 2399102 | 34629  | 49.563 |

Racemate

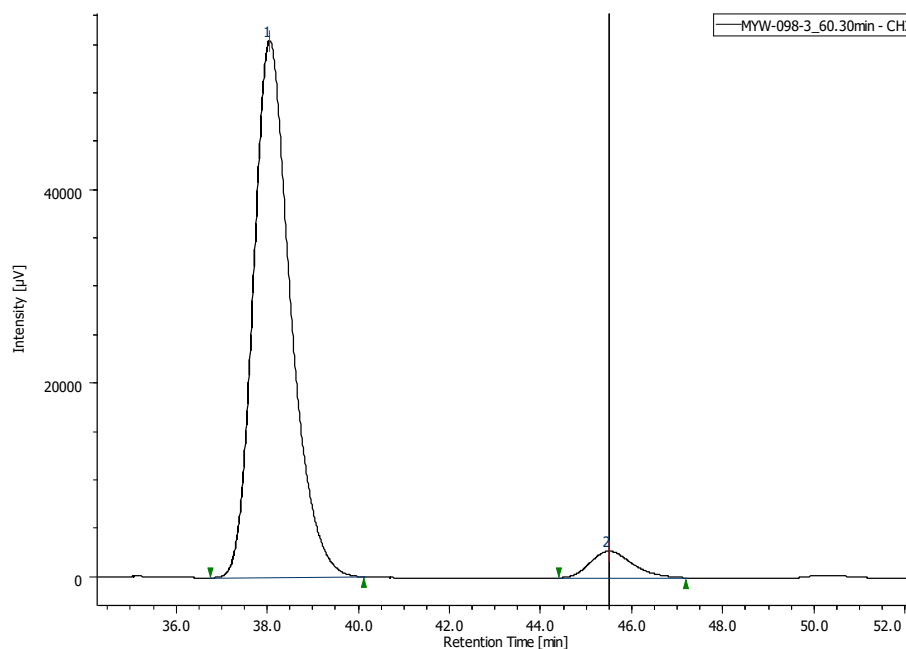

| # Peak | CH | tR (min) | Area    | Height | Area% |
|--------|----|----------|---------|--------|-------|
| 1      | 3  | 38.05    | 3126691 | 55381  | 94.6  |
| 2      | 3  | 45.492   | 178463  | 2766   | 5.4   |

89% ee

Daicel Chiralpak AD-3, Hexane:*i*-PrOH = 90:10, v/v, detector: UV 254 nm, flow rate = 0.5 mL/min, 35 °C

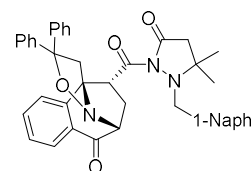



### HPLC analysis of *endo-5f*

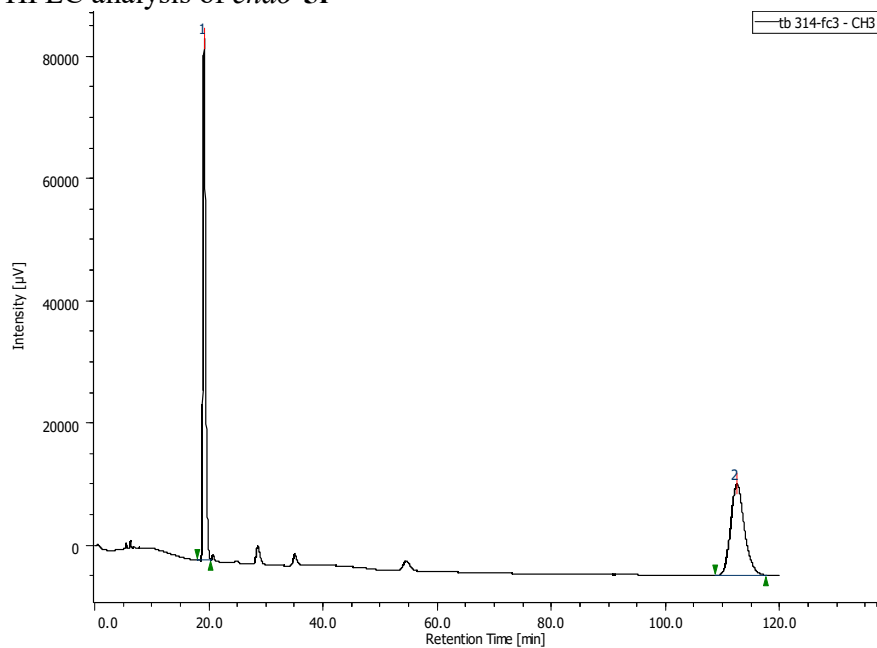

| # Peak | CH | tR (min) | Area    | Height | Area%  |
|--------|----|----------|---------|--------|--------|
| 1      | 3  | 19.15    | 2528274 | 85261  | 50.305 |
| 2      | 3  | 112.35   | 2497627 | 14928  | 49.695 |

Racemate

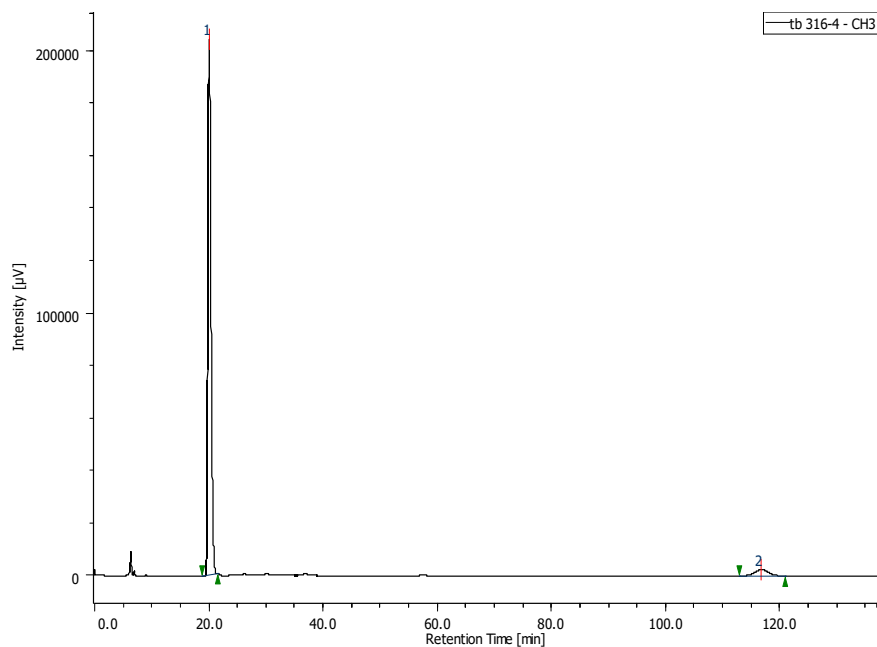

| # Peak | CH | tR (min) | Area    | Height | Area%  |
|--------|----|----------|---------|--------|--------|
| 1      | 3  | 20.05    | 7539283 | 203689 | 94.371 |
| 2      | 3  | 116.558  | 449685  | 2533   | 5.629  |

89% ee

Daicel Chiralpak AD-3, Hexane:*i*-PrOH = 90:10, v/v, detector: UV 254 nm, flow rate = 0.5 mL/min, 35 °C

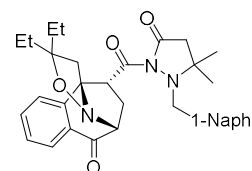

### HPLC analysis of *endo*-5g

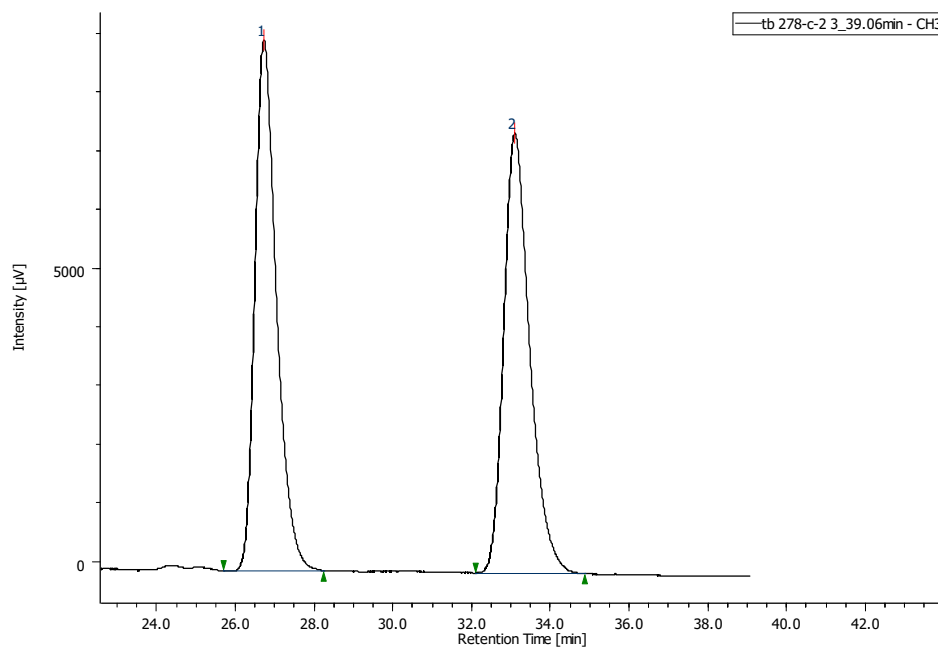

| # Peak | CH | tR (min) | Area   | Height | Area%  |
|--------|----|----------|--------|--------|--------|
| 1      | 3  | 26.725   | 342220 | 9031   | 49.961 |
| 2      | 3  | 33.083   | 342751 | 7480   | 50.039 |

Racemate

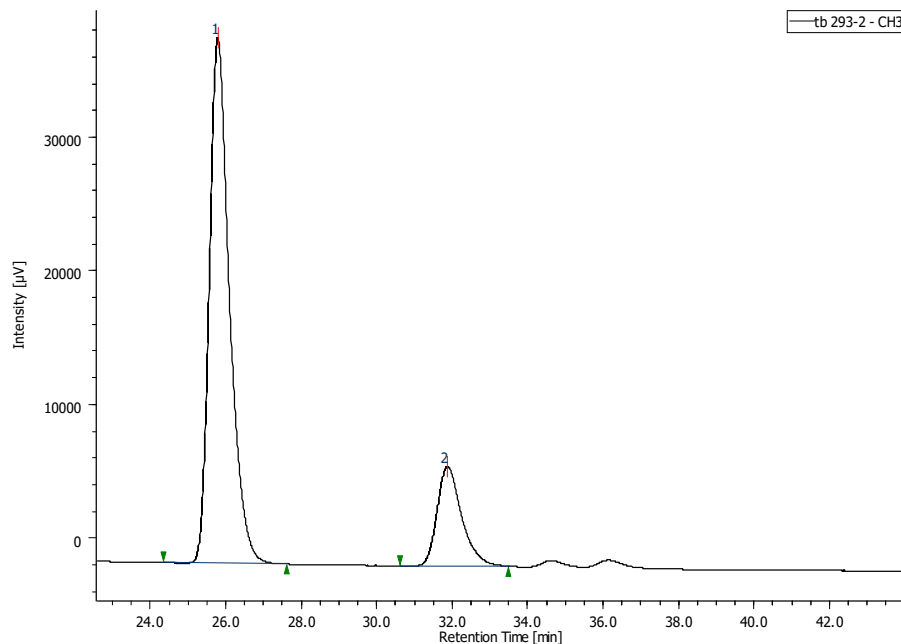

| # Peak | CH | tR (min) | Area    | Height | Area%  |
|--------|----|----------|---------|--------|--------|
| 1      | 3  | 25.783   | 1450775 | 39243  | 81.323 |
| 2      | 3  | 31.867   | 333186  | 7404   | 18.677 |

63% ee

Daicel Chiralpak AD-3, Hexane:*i*-PrOH = 90:10, v/v, detector: UV 254 nm, flow rate = 0.5 mL/min, 35 °C

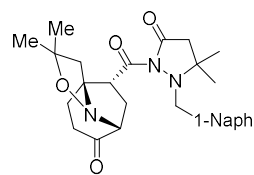

Supplement: c8cc09224a1.pdf [file c8cc09224a1.pdf]
